# Supplementary material for: Metabolomics and complementary techniques to investigate the plant phytochemical cosmos
Source: Royal Society of Chemistry journal article supplement (doi:10.1039/d1np00014d), 2021-01-01
Supplement: d1np00014d1.xlsx [file d1np00014d1.xlsx]

## Sheet: Nodes
Title	Comment	ID	Predicted metabolite	Rt	Mz	Adduct	Formula	Ontology	InChIKey	SMILES	BackgroundColor	MSMS
00000_Ellipticine; PlaSMA ID-1034	Annotation level-1; PlaSMA ID-1034; ID title-Ellipticine; Max plant tissue-Standard only	0	Ellipticine; PlaSMA ID-1034	4.93	247.123	[M+H]+	C17H14N2		CTSPAMFJBXKSOY-UHFFFAOYSA-N	N=1C=CC=2C(C1)=C(C=3C=4C=CC=CC4NC3C2C)C	rgb(128, 128, 128)	149.2737:17 151.0616:36 151.8575:19 156.9939:29 174.0484:20 175.0448:19 176.0562:30 176.06441:19 177.0587:18 179.07179:20 180.07829:25 182.3313:21 188.3204:19 191.06509:19 191.07359:39 201.0594:32 202.069:54 203.44971:18 204.0838:456 204.9241:23 205.0757:18 205.0896:60 206.0954:32 217.0549:18 217.0674:20 218.1075:36 222.11951:17 226.5163:33 230.0773:32 230.08791:76 230.11929:19 230.4633:23 231.09…
00001_9-Nitro-20(S)-camptothecin; PlaSMA ID-2160	Annotation level-1; PlaSMA ID-2160; ID title-9-Nitro-20(S)-camptothecin; Max plant tissue-Standard only	1	9-Nitro-20(S)-camptothecin; PlaSMA ID-2160	5.87	394.103	[M+H]+	C20H15N3O6		VHXNKPBCCMUMSW-UHFFFAOYNA-N	O=C1OCC=2C(=O)N3C(=CC2C1(O)CC)C=4N=C5C=CC=C(C5=CC4C3)N(=O)=O	rgb(128, 128, 128)	88.40989:32 121.0514:21 135.29601:22 146.06261:23 153.0641:20 159.0452:26 167.069:21 168.0701:20 175.049:19 180.0894:28 193.0824:18 194.0909:19 196.642:20 201.38789:17 202.0728:51 207.0842:20 208.0909:41 212.8299:23 213.1349:17 217.0722:42 217.0956:18 217.12041:20 218.0887:39 219.08771:17 219.0972:32 220.04041:30 220.069:24 220.10941:47 221.07001:20 221.1075:18 222.07809:46 223.09171:17 226.05321…
00002_Norharman; PlaSMA ID-382	Annotation level-1; PlaSMA ID-382; ID title-Norharman; Max plant tissue-Standard only	2	Norharman; PlaSMA ID-382	3.48	169.076	[M+H]+	C11H8N2		AIFRHYZBTHREPW-UHFFFAOYSA-N	N=1C=CC2=C(C1)NC=3C=CC=CC32	rgb(128, 128, 128)	55.71315:26 64.0201:24 89.03819:17 89.7677:27 96.96468:18 97.12778:26 111.9848:19 111.9897:18 114.0476:18 114.9183:20 115.0504:374 115.0556:983 116.0415:23 116.0509:166 116.0612:59 127.0548:20 128.0417:17 129.88789:36 140.0439:20 140.0504:22 142.0593:76 142.0657:167 143.0676:40 143.826:17 151.2874:21 153.0414:20 165.7679:20 166.04781:18 167.0605:18 168.0491:30 168.0676:593 168.8438:18 169.0213:27…
00003_L-Oxonoreleagnine; PlaSMA ID-530	Annotation level-1; PlaSMA ID-530; ID title-L-Oxonoreleagnine; Max plant tissue-Standard only	3	L-Oxonoreleagnine; PlaSMA ID-530	5.53	187.087	[M+H]+	C11H10N2O		FZHZQHNKCPJTNQ-UHFFFAOYSA-N	O=C1NCCC=2C=3C=CC=CC3NC12	rgb(128, 128, 128)	77.0407:30 78.04094:21 80.51866:22 91.05441:18 93.05333:20 102.0449:42 103.0309:17 103.0597:70 105.07:30 105.0759:26 115.0545:842 116.0418:26 116.0483:92 116.0558:45 116.315:17 117.0423:34 117.0572:486 117.0671:58 117.0799:19 118.0617:98 118.0737:17 118.1188:18 126.7863:27 127.0508:126 128.045:64 129.0567:43 130.0361:52 130.0508:29 130.0658:1117 130.7529:17 131.06551:116 131.07091:234 132.0405:19…
00004_Sempervirine; PlaSMA ID-1248	Annotation level-1; PlaSMA ID-1248; ID title-Sempervirine; Max plant tissue-Standard only	4	Sempervirine; PlaSMA ID-1248	5.23	273.139	[M+H]+	C19H16N2		UQVUEULZDJRMJR-UHFFFAOYSA-N	[N-]1C=2C=CC=CC2C=3C=C[N+]=4C=C5C(=CC4C13)CCCC5	rgb(128, 128, 128)	115.0473:38 119.0822:29 136.2084:34 138.9245:35 140.0461:33 140.0556:24 152.1124:17 154.0663:23 158.0433:20 158.7243:33 159.8887:19 160.603:18 165.0645:20 167.0574:79 167.0648:25 167.9765:34 168.0611:36 168.21449:30 170.5349:18 172.0006:35 172.8987:33 175.26421:26 176.0661:27 177.3297:18 181.04939:21 181.0649:45 181.07739:38 181.0869:20 182.0762:34 182.0844:61 183.0836:17 184.7449:21 184.7616:18 …
00005_Evodiamine; PlaSMA ID-1581	Annotation level-1; PlaSMA ID-1581; ID title-Evodiamine; Max plant tissue-Standard only	5	Evodiamine; PlaSMA ID-1581	7.77	304.144	[M+H]+	C19H17N3O		TXDUTHBFYKGSAH-UHFFFAOYNA-N	O=C1C=2C=CC=CC2N(C)C3C=4NC=5C=CC=CC5C4CCN13	rgb(128, 128, 128)	61.08914:18 63.61132:29 65.03896:30 77.03997:211 78.05046:32 79.04526:30 79.05209:70 79.05643:65 79.27449:25 80.05666:27 82.53544:33 88.5792:42 89.04054:24 91.05388:370 92.05735:81 105.0309:110 106.0373:23 106.066:959 106.3227:31 107.0537:24 107.0646:31 107.0754:18 115.0612:21 115.6018:22 116.0425:161 116.0505:1050 116.4282:17 116.6669:20 117.0496:48 117.0547:55 117.0807:24 118.0641:408 118.0703:…
00006_Tetrahydroalstonine; PlaSMA ID-1946	Annotation level-1; PlaSMA ID-1946; ID title-Tetrahydroalstonine; Max plant tissue-Standard only	6	Tetrahydroalstonine; PlaSMA ID-1946	4.87	353.186	[M+H]+	C21H24N2O3		GRTOGORTSDXSFK-UHFFFAOYNA-N	O=C(OC)C1=COC(C)C2CN3CCC=4C=5C=CC=CC5NC4C3CC12	rgb(128, 128, 128)	52.25431:25 56.05177:42 56.72569:17 60.56416:17 61.24913:24 70.06441:24 77.04017:18 81.06493:45 81.07213:25 91.03819:25 91.05387:48 91.26866:20 94.06378:17 95.05267:17 96.04285:27 96.07487:54 97.06268:18 97.17518:30 103.0525:24 103.057:30 104.0445:24 105.0679:48 107.0667:24 108.0828:266 109.0277:17 109.0533:21 109.0613:21 109.0754:25 109.6931:22 115.0316:29 115.052:117 116.0527:18 116.3091:20 117…
00007_Corynanthine; PlaSMA ID-1985	Annotation level-1; PlaSMA ID-1985; ID title-Corynanthine; Max plant tissue-Standard only	7	Corynanthine; PlaSMA ID-1985	4.35	355.202	[M+H]+	C21H26N2O3		BLGXFZZNTVWLAY-UHFFFAOYNA-N	O=C(OC)C1C(O)CCC2CN3CCC=4C=5C=CC=CC5NC4C3CC12	rgb(128, 128, 128)	56.04968:19 65.07784:24 65.41373:27 80.04673:36 80.05257:73 86.69676:28 92.04484:22 92.0606:33 94.06434:109 94.0744:41 95.09462:24 96.04452:18 96.0808:28 104.0533:20 105.0707:18 105.3062:17 106.0594:17 106.0712:55 106.2281:17 107.0846:45 110.1:24 112.328:44 115.0537:107 116.0494:20 116.0582:22 117.0525:17 117.0608:149 117.0706:885 117.3449:20 118.05:47 118.0623:55 118.0751:35 119.0511:25 120.0811…
00008_Isoreserpin; PlaSMA ID-3023	Annotation level-1; PlaSMA ID-3023; ID title-Isoreserpin; Max plant tissue-Standard only	8	Isoreserpin; PlaSMA ID-3023	6.12	609.281	[M+H]+	C33H40N2O9		QEVHRUUCFGRFIF-UHFFFAOYNA-N	O=C(OC1CC2CN3CCC=4C=5C=CC(OC)=CC5NC4C3CC2C(C(=O)OC)C1OC)C6=CC(OC)=C(OC)C(OC)=C6	rgb(128, 128, 128)	70.06411:24 71.05059:20 79.05682:24 91.05091:18 98.33502:22 106.0656:31 107.0663:23 109.0651:42 111.0434:19 111.052:22 114.3549:20 117.0559:18 118.066:18 119.3636:18 120.0784:23 122.1226:17 123.0832:19 130.3506:25 131.0437:18 131.0493:20 132.07719:17 132.0867:35 132.3701:24 133.082:24 134.0645:17 135.0639:24 137.08099:21 139.07899:61 139.091:19 142.06239:35 143.05969:20 143.0686:35 144.0583:24 14…
00009_Syrosingopine; PlaSMA ID-3154	Annotation level-1; PlaSMA ID-3154; ID title-Syrosingopine; Max plant tissue-Standard only	9	Syrosingopine; PlaSMA ID-3154	6.72	667.286	[M+H]+	C35H42N2O11		ZCDNRPPFBQDQHR-UHFFFAOYNA-N	O=C(OC1=C(OC)C=C(C=C1OC)C(=O)OC2CC3CN4CCC=5C=6C=CC(OC)=CC6NC5C4CC3C(C(=O)OC)C2OC)OCC	rgb(128, 128, 128)	56.04875:49 79.05005:17 80.05252:32 82.03212:24 83.16655:17 91.05775:48 91.06362:21 92.3854:20 94.06641:130 97.06985:23 97.20319:26 105.0726:39 111.0461:86 112.0502:26 112.0753:49 113.0622:31 116.0646:28 117.0505:18 120.0783:22 122.0593:69 124.3581:22 125.1734:20 126.908:38 131.0876:114 132.0558:37 132.0813:21 132.08971:46 132.7099:18 133.06441:38 136.07111:27 136.0873:30 143.0265:22 143.0507:18 …
00010_Speciosine; PlaSMA ID-2589	Annotation level-1; PlaSMA ID-2589; ID title-Speciosine; Max plant tissue-Standard only	10	Speciosine; PlaSMA ID-2589	5.03	478.222	[M+H]+	C28H31NO6		SOFSXTKPGSIDCI-UHFFFAOYNA-N	O=C1C=C2C(=CC=C1OC)C3=C(OC)C(OC)=C(OC)C=C3CCC2N(C)CC=4C=CC=CC4O	rgb(128, 128, 128)	57.0524:23 70.06992:51 72.0474:209 84.04205:19 86.06252:23 102.0562:21 107.0395:21 107.0475:64 107.0539:40 108.0542:34 119.0506:23 121.0619:34 133.09241:29 136.0764:472 137.0358:18 137.05811:43 137.0752:26 137.0833:20 138.0623:27 143.0497:30 148.0733:61 151.0437:33 151.0784:18 152.075:21 155.0735:18 156.07829:25 157.06261:44 160.0712:45 161.089:38 162.7285:27 164.0782:18 165.0674:24 166.0461:18 1…
00011_Homatropine; PlaSMA ID-1288	Annotation level-1; PlaSMA ID-1288; ID title-Homatropine; Max plant tissue-Standard only	11	Homatropine; PlaSMA ID-1288	3.15	276.159	[M+H]+	C16H21NO3		ZTVIKZXZYLEVOL-UHFFFAOYNA-N	O=C(OC1CC2N(C)C(CC2)C1)C(O)C=3C=CC=CC3	rgb(128, 128, 128)	58.39899:20 67.05:24 67.05492:26 67.05886:22 70.05801:24 70.06298:26 77.02209:24 77.03396:15 77.0398:87 79.05457:104 79.06429:27 81.05843:44 82.06105:24 82.06773:26 83.06599:24 83.07213:49 83.79721:18 89.89761:20 91.03819:19 91.05257:180 91.05858:150 92.05486:21 92.15845:22 93.05186:18 93.07005:1959 93.61:20 93.99845:20 94.07121:98 94.07672:108 95.07453:26 95.08653:96 96.07568:25 96.08098:20 96.8…
00012_Hyoscyamine; PlaSMA ID-1441	Annotation level-1; PlaSMA ID-1441; ID title-Hyoscyamine; Max plant tissue-Standard only	12	Hyoscyamine; PlaSMA ID-1441	3.59	290.175	[M+H]+	C17H23NO3		RKUNBYITZUJHSG-UHFFFAOYNA-N	O=C(OC1CC2N(C)C(CC2)C1)C(C=3C=CC=CC3)CO	rgb(128, 128, 128)	56.05286:22 57.0597:18 57.12263:19 58.05824:26 58.06526:37 59.93867:19 67.04323:46 67.04789:19 67.05547:215 68.02714:42 68.04283:18 68.05033:51 68.20711:31 69.05109:31 69.05616:28 70.06532:101 70.22781:17 73.50779:23 77.04106:489 79.05692:120 80.30577:18 81.05207:18 81.27784:23 82.05452:30 82.06573:377 83.06583:34 83.07337:207 83.08858:30 84.07591:36 84.08629:18 86.48292:37 86.50843:19 86.69918:2…
00013_Atropine; PlaSMA ID-1442	Annotation level-1; PlaSMA ID-1442; ID title-Atropine; Max plant tissue-Standard only	13	Atropine; PlaSMA ID-1442	3.6	290.175	[M+H]+	C17H23NO3		RKUNBYITZUJHSG-UHFFFAOYNA-N	O=C(OC1CC2N(C)C(CC2)C1)C(C=3C=CC=CC3)CO	rgb(128, 128, 128)	56.77094:21 57.05873:23 58.06607:19 58.20013:17 65.03668:17 67.03669:23 67.0574:312 68.0561:23 70.06732:111 77.03254:51 77.03799:148 77.04379:83 78.04516:17 79.05299:18 79.05885:20 81.06793:18 82.0601:39 82.06689:219 83.07098:74 83.07643:16 83.65601:17 83.78517:18 84.07781:30 86.06287:17 87.11963:35 88.65373:18 91.05492:909 91.09883:26 92.05761:100 93.05587:44 93.07066:5186 93.65356:22 94.0739:53…
00014_Vincanidine; PlaSMA ID-1624	Annotation level-1; PlaSMA ID-1624; ID title-Vincanidine; Max plant tissue-Standard only	14	Vincanidine; PlaSMA ID-1624	3.38	309.16	[M+H]+	C19H20N2O2		JDOFCMASVRMYJU-UHFFFAOYNA-N	O=CC1=C2NC=3C(O)=CC=CC3C24CCN5CC(=CC)C1CC54	rgb(128, 128, 128)	60.09291:37 81.06834:61 81.25935:38 93.0628:18 95.07977:28 98.09507:47 105.0562:43 105.0683:35 105.0726:17 108.0887:28 109.0827:51 117.0699:29 118.0662:20 122.0918:19 122.0988:76 122.2129:17 127.058:21 128.05701:18 129.0733:27 130.0645:26 132.0752:40 132.0842:22 133.0461:21 133.07561:23 134.0448:34 134.0634:36 134.0818:21 134.0929:19 134.09959:33 134.5656:18 135.1021:19 136.0793:43 136.1066:25 14…
00015_Tubotaiwine; PlaSMA ID-1751	Annotation level-1; PlaSMA ID-1751; ID title-Tubotaiwine; Max plant tissue-Standard only	15	Tubotaiwine; PlaSMA ID-1751	4.92	325.191	[M+H]+	C20H24N2O2		RLAKWLFUMAABBE-UHFFFAOYNA-N	O=C(OC)C1=C2NC=3C=CC=CC3C24CCN5CCC1C(CC)C54	rgb(128, 128, 128)	61.6959:24 67.51641:23 77.03731:27 84.04292:34 94.06477:29 106.1781:17 108.0842:26 111.1032:55 112.1119:17 117.0657:21 120.0796:25 120.768:17 130.0553:51 130.0657:219 132.0703:26 136.11189:30 143.0755:27 144.0815:113 145.0847:65 146.08521:18 154.0629:105 155.0549:18 155.07021:63 156.0925:20 158.09641:47 159.09061:56 165.06551:25 165.8596:24 167.0733:112 167.07899:54 168.0779:93 168.0885:30 168.28…
00016_Strychnine; PlaSMA ID-1829	Annotation level-1; PlaSMA ID-1829; ID title-Strychnine; Max plant tissue-Standard only	16	Strychnine; PlaSMA ID-1829	3.46	335.175	[M+H]+	C21H22N2O2		QMGVPVSNSZLJIA-UHFFFAOYNA-N	O=C1N2C=3C=CC=CC3C45CCN6CC7=CCOC(C1)C(C7CC64)C25	rgb(128, 128, 128)	55.01995:49 56.04865:30 67.0549:24 69.07217:35 79.05456:31 80.06395:21 81.06809:28 82.06679:42 83.04908:20 91.0561:78 91.10518:18 93.05842:42 93.06528:44 93.06927:45 94.05486:19 94.06667:25 95.04704:32 95.05061:81 97.03263:33 103.0557:17 104.0045:18 104.0467:19 105.0736:28 106.0648:35 106.0727:21 107.0487:17 107.0719:47 107.0838:70 108.0671:19 108.0798:170 109.0631:27 110.0229:32 114.5825:28 115.…
00017_19S-Methoxytubotaiwine; PlaSMA ID-1982	Annotation level-1; PlaSMA ID-1982; ID title-19S-Methoxytubotaiwine; Max plant tissue-Standard only	17	19S-Methoxytubotaiwine; PlaSMA ID-1982	4.55	355.202	[M+H]+	C21H26N2O3		LTOOPESWVADEAE-UHFFFAOYNA-N	O=C(OC)C1=C2NC=3C=CC=CC3C24CCN5CCC1C(C(OC)C)C54	rgb(128, 128, 128)	58.85089:31 59.04635:237 59.05261:137 59.8829:18 70.05597:28 70.06017:64 70.06667:226 82.06472:40 82.07132:17 91.05112:29 94.06789:28 94.19287:17 100.0646:24 114.0949:29 118.0688:18 120.0391:28 120.0822:60 122.0511:37 130.0621:58 130.17731:26 131.0699:20 131.07941:17 136.06129:18 137.6658:44 138.0453:26 141.0663:18 144.0755:30 144.0882:28 145.0907:22 146.0488:20 147.9682:29 151.0784:23 152.10719:…
00018_Sparteine; PlaSMA ID-946	Annotation level-1; PlaSMA ID-946; ID title-Sparteine; Max plant tissue-Standard only	18	Sparteine; PlaSMA ID-946	2.33	235.217	[M+H]+	C15H26N2		SLRCCWJSBJZJBV-UHFFFAOYNA-N	N12CCCCC1C3CN4CCCCC4C(C2)C3	rgb(128, 128, 128)	96.07841:20 98.09334:224 98.09921:110 98.10571:31 99.10407:44 99.99364:17 134.09579:20 137.123:20 152.1353:20 168.7995:31 176.1465:27 190.15601:27 195.9102:29 197.05659:21 224.6824:21 233.20399:187 234.19971:87 235.1819:55 235.21809:4954 235.2601:17
00019_Ethylrhoeagenine; PlaSMA ID-2180	Annotation level-1; PlaSMA ID-2180; ID title-Ethylrhoeagenine; Max plant tissue-Standard only	19	Ethylrhoeagenine; PlaSMA ID-2180	5.15	398.16	[M+H]+	C22H23NO6		RKBDCPZCGRWNMP-UHFFFAOYNA-N	O1C2=CC=C3C(=C2OC1)C(OCC)OC4C5=CC=6OCOC6C=C5CCN(C)C34	rgb(128, 128, 128)	77.04141:18 82.07845:20 103.0502:20 103.0601:26 104.0643:43 115.0581:20 118.0701:26 119.0461:17 128.0531:21 131.04871:23 132.0491:18 132.0853:48 133.18871:26 135.0444:83 136.0511:20 146.0564:27 147.0443:22 147.0667:39 148.0435:19 148.0562:77 149.05901:325 151.05611:17 158.0618:20 159.04401:48 159.0704:28 160.0442:18 160.07829:39 161.0439:91 162.0612:23 162.0701:25 162.08231:17 163.0266:17 163.075…
00020_Desoxypeganine; PlaSMA ID-404	Annotation level-1; PlaSMA ID-404; ID title-Desoxypeganine; Max plant tissue-Standard only	20	Desoxypeganine; PlaSMA ID-404	2.8	173.107	[M+H]+	C11H12N2		WUFQLZTXIWKION-UHFFFAOYSA-N	N=1C=2C=CC=CC2CN3C1CCC3	rgb(128, 128, 128)	68.0577:20 69.0364:18 70.85159:18 77.03849:35 79.05927:26 87.84573:17 91.0544:43 94.0651:24 103.0566:23 104.0557:37 105.0693:21 106.0652:216 110.3057:21 117.0547:54 117.0596:52 117.0722:26 117.7463:17 118.0618:22 118.0696:83 118.0746:27 123.3377:17 127.0542:21 128.04961:19 130.0567:39 130.0639:77 130.0737:21 130.9673:17 131.0677:53 131.6097:17 132.08189:38 132.60851:18 143.0623:22 144.06419:160 1…
00021_Deoxyvasicinone; PlaSMA ID-531	Annotation level-1; PlaSMA ID-531; ID title-Deoxyvasicinone; Max plant tissue-Standard only	21	Deoxyvasicinone; PlaSMA ID-531	3.94	187.087	[M+H]+	C11H10N2O		VARHXCYGZKSOOO-UHFFFAOYSA-N	O=C1C=2C=CC=CC2N=C3N1CCC3	rgb(128, 128, 128)	65.0387:48 68.04916:63 68.05238:109 68.41602:19 69.03008:19 77.03973:239 86.85039:25 89.04084:44 89.228:29 90.02892:21 90.04053:23 92.04912:339 93.0526:32 103.0376:17 104.0516:24 110.0638:22 115.0542:356 116.0267:17 116.044:57 116.0524:302 116.0607:70 117.0433:28 117.0488:18 117.067:37 117.0748:45 118.0673:23 118.3353:21 119.0335:24 119.0557:37 119.0616:17 120.0446:292 121.0458:19 121.1153:25 127…
00022_Vasicine; PlaSMA ID-545	Annotation level-1; PlaSMA ID-545; ID title-Vasicine; Max plant tissue-Standard only	22	Vasicine; PlaSMA ID-545	2.55	189.102	[M+H]+	C11H12N2O		YIICVSCAKJMMDJ-UHFFFAOYNA-N	OC1C2=NC=3C=CC=CC3CN2CC1	rgb(128, 128, 128)	77.03806:17 91.05782:25 104.0477:19 115.0482:19 115.0615:29 116.05:83 116.0572:16 117.0586:57 117.0677:20 117.8682:19 118.0681:714 119.0701:45 128.0493:20 129.0697:54 130.0639:25 131.0584:20 142.06641:25 142.85921:39 143.05479:21 143.0616:46 143.0795:119 144.0601:17 144.0685:25 144.0769:65 144.0838:112 152.05209:23 154.0681:169 155.0739:68 169.065:43 169.0768:149 169.088:29 170.09419:40 171.0605:…
00023_Sanguinarine; PlaSMA ID-1805	Annotation level-1; PlaSMA ID-1805; ID title-Sanguinarine; Max plant tissue-Standard only	23	Sanguinarine; PlaSMA ID-1805	4.85	332.091	[M]+	C20H14NO4		INVGWHRKADIJHF-UHFFFAOYSA-N	O1C=2C=CC3=C4C=CC=5C=C6OCOC6=CC5C4=[N+](C=C3C2OC1)C	rgb(128, 128, 128)	117.8242:18 162.3969:30 175.05881:24 176.0719:25 177.0544:23 178.05991:20 178.6557:38 179.06889:24 188.0652:18 189.0666:121 189.0752:78 190.0459:18 190.0722:35 190.3233:21 191.088:39 191.1008:22 192.0789:20 192.0867:21 201.0522:29 201.05949:24 201.07021:27 201.07761:50 202.0027:18 202.05901:42 202.07359:78 202.4035:20 203.04021:20 203.0708:102 203.0786:50 204.06779:35 204.078:40 204.088:64 204.10…
00024_Chelerythrine; PlaSMA ID-1910	Annotation level-1; PlaSMA ID-1910; ID title-Chelerythrine; Max plant tissue-Standard only	24	Chelerythrine; PlaSMA ID-1910	5.3	348.123	[M]+	C21H18NO4		LLEJIEBFSOEYIV-UHFFFAOYSA-N	O(C=1C=CC2=C3C=CC=4C=C5OCOC5=CC4C3=[N+](C=C2C1OC)C)C	rgb(128, 128, 128)	66.49751:41 115.8111:20 127.404:22 148.058:24 153.06129:24 167.1044:17 175.91451:17 177.0701:17 179.1433:18 189.6223:24 190.0916:20 196.871:32 197.2261:28 197.6714:20 200.79961:25 201.0576:17 201.08369:17 203.0826:31 203.8026:26 204.07629:24 204.0863:25 205.0668:17 205.0867:21 205.0921:39 207.4782:20 207.6506:18 214.01199:20 214.05589:27 216.0838:68 216.6857:24 218.0867:38 218.38631:36 218.5466:1…
00025_Physostigmine; PlaSMA ID-1289	Annotation level-1; PlaSMA ID-1289; ID title-Physostigmine; Max plant tissue-Standard only	25	Physostigmine; PlaSMA ID-1289	3.31	276.171	[M+H]+	C15H21N3O2		PIJVFDBKTWXHHD-UHFFFAOYNA-N	O=C(OC1=CC=C2C(=C1)C3(C)CCN(C)C3N2C)NC	rgb(128, 128, 128)	103.0547:17 105.0674:18 107.0556:18 118.0555:18 119.0707:25 121.0371:17 121.0595:19 129.06779:17 132.0838:26 133.0618:21 134.10069:120 134.1084:43 134.6745:21 141.8694:18 144.0788:29 144.0882:53 144.23441:17 145.0842:20 145.0956:21 146.05099:23 146.0654:84 147.0533:56 147.06799:1026 147.3277:28 147.50549:18 148.0739:72 148.1142:22 158.0826:20 159.2657:33 160.0686:59 160.07761:68 160.0869:50 160.1…
00026_Viridiflorine; PlaSMA ID-1396	Annotation level-1; PlaSMA ID-1396; ID title-Viridiflorine; Max plant tissue-Standard only	26	Viridiflorine; PlaSMA ID-1396	3.05	286.201	[M+H]+	C15H27NO4		BWQSLRZZOVFVHJ-UHFFFAOYNA-N	O=C(OCC1CCN2CCCC21)C(O)(C(O)C)C(C)C	rgb(128, 128, 128)	142.1301:26 158.9527:20 159.0629:21 286.20169:193
00027_Trachelanthine; PlaSMA ID-1561	Annotation level-1; PlaSMA ID-1561; ID title-Trachelanthine; Max plant tissue-Standard only	27	Trachelanthine; PlaSMA ID-1561	3.11	302.196	[M+H]+	C15H27NO5		DLNWZIVYKQXLTN-UHFFFAOYNA-N	O=C(OCC1CC[N+]2([O-])CCCC12)C(O)(C(O)C)C(C)C	rgb(128, 128, 128)	55.05735:35 63.32513:17 68.04797:25 70.06211:57 70.06717:33 71.05058:35 71.07088:31 73.06703:36 80.05051:28 80.56847:17 81.04669:29 81.05901:18 81.06879:28 83.07363:944 84.08063:1064 85.60573:19 86.05703:30 96.07463:61 96.0833:50 97.08597:80 97.0917:151 98.06385:36 99.05737:20 101.1208:17 105.6544:22 108.0837:64 109.0857:24 109.091:22 109.0959:18 110.0969:1318 111.0982:117 111.105:20 112.0731:20 …
00028_Protopine; PlaSMA ID-1962	Annotation level-1; PlaSMA ID-1962; ID title-Protopine; Max plant tissue-Standard only	28	Protopine; PlaSMA ID-1962	4.36	354.134	[M+H]+	C20H19NO5		GPTFURBXHJWNHR-UHFFFAOYSA-N	O=C1C2=CC=3OCOC3C=C2CCN(C)CC4=C5OCOC5=CC=C4C1	rgb(128, 128, 128)	58.06511:19 59.76117:22 74.01943:18 79.05568:17 91.01349:22 91.05491:94 91.0591:143 92.05301:18 103.0463:17 103.0572:30 107.0383:75 107.0488:109 107.0566:103 108.0577:44 109.0655:61 117.0255:19 119.0196:17 119.0306:22 119.0485:228 120.0575:31 126.0267:27 129.0275:36 130.0694:29 131.0497:68 131.0759:32 131.56461:36 132.0777:21 135.04601:311 136.0479:116 137.052:19 137.067:18 142.85069:37 143.0499:…
00029_Palmatine; PlaSMA ID-1936	Annotation level-1; PlaSMA ID-1936; ID title-Palmatine; Max plant tissue-Standard only	29	Palmatine; PlaSMA ID-1936	4.96	352.154	[M]+	C21H22NO4		QUCQEUCGKKTEBI-UHFFFAOYSA-N	O(C=1C=CC2=CC=3C4=CC(OC)=C(OC)C=C4CC[N+]3C=C2C1OC)C	rgb(128, 128, 128)	56.56496:20 62.78182:32 72.74011:37 96.65725:20 122.8673:21 143.5685:18 153.0345:52 157.4734:22 175.40491:17 179.91611:27 183.7892:34 187.1868:67 192.6153:39 192.6971:18 206.36951:56 206.96181:17 208.4007:40 208.9503:33 209.52789:17 211.0235:19 214.3792:20 216.2915:45 217.03551:29 217.1073:22 217.3304:22 218.0468:52 220.07629:61 220.8705:24 221.0864:23 224.2421:26 225.5388:34 225.64191:28 226.744…
00030_Dehydrocorydaline; PlaSMA ID-2039	Annotation level-1; PlaSMA ID-2039; ID title-Dehydrocorydaline; Max plant tissue-Standard only	30	Dehydrocorydaline; PlaSMA ID-2039	5.19	366.169	[M]+	C22H24NO4		RFKQJTRWODZPHF-UHFFFAOYSA-N	O(C=1C=CC=2C(=C[N+]3=C(C4=CC(OC)=C(OC)C=C4CC3)C2C)C1OC)C	rgb(128, 128, 128)	54.32251:18 67.9939:17 102.6854:17 103.4809:23 118.8886:21 120.0615:44 155.04649:17 158.3186:32 172.4561:17 182.31261:28 190.3515:22 191.9408:17 198.1153:18 203.90739:24 209.668:49 211.45239:27 212.9146:36 212.93401:19 216.0836:30 217.4666:17 219.8235:19 221.89841:26 222.929:33 224.0027:17 229.2084:17 231.5313:21 231.59039:17 234.718:17 236.0724:34 236.5849:30 237.6178:20 238.3777:30 238.4437:36 …
00031_(+)-Corydaline; PlaSMA ID-2073	Annotation level-1; PlaSMA ID-2073; ID title-(+)-Corydaline; Max plant tissue-Standard only	31	(+)-Corydaline; PlaSMA ID-2073	4.86	370.201	[M+H]+	C22H27NO4		VRSRXLJTYQVOHC-UHFFFAOYNA-N	O(C1=CC=C2C(=C1OC)CN3CCC4=CC(OC)=C(OC)C=C4C3C2C)C	rgb(128, 128, 128)	74.8051:24 75.04372:24 77.04433:19 79.05523:79 79.06385:20 80.46815:24 82.91245:18 90.04626:25 91.04356:18 91.05341:27 97.01665:17 101.551:18 103.0602:29 104.0292:35 105.063:102 105.0685:288 106.0695:24 106.4888:21 108.0608:21 109.5565:18 115.0469:25 115.2718:18 117.0663:36 117.0766:20 118.0438:24 118.0537:37 118.0683:43 118.0826:30 119.0499:59 119.0825:31 120.0527:41 121.0638:110 122.1058:21 123…
00032_(-)-Podophyllotoxin; PlaSMA ID-2261	Annotation level-1; PlaSMA ID-2261; ID title-(-)-Podophyllotoxin; Max plant tissue-Standard only	32	(-)-Podophyllotoxin; PlaSMA ID-2261	6.26	415.139	[M+H]+	C22H22O8		YJGVMLPVUAXIQN-UHFFFAOYNA-N	O=C1OCC2C(O)C3=CC=4OCOC4C=C3C(C5=CC(OC)=C(OC)C(OC)=C5)C12	rgb(128, 128, 128)	77.03709:24 79.17729:29 85.02806:34 98.031:32 109.0687:29 115.0552:47 117.0682:133 117.0751:48 117.2704:18 123.0366:23 123.0431:17 125.0602:53 125.2227:17 127.0506:29 128.0544:18 131.0365:23 131.0473:45 132.05389:28 133.0654:41 133.5853:21 135.03799:69 135.0434:89 135.0504:29 138.034:29 138.0687:28 143.0463:94 143.05611:39 145.0645:672 146.06889:156 147.0416:71 147.069:36 149.02859:60 151.03529:6…
00033_Etoposide; PlaSMA ID-2962	Annotation level-1; PlaSMA ID-2962; ID title-Etoposide; Max plant tissue-Standard only	33	Etoposide; PlaSMA ID-2962	5.4	589.192	[M+H]+	C29H32O13		VJJPUSNTGOMMGY-UHFFFAOYNA-N	O=C1OCC2C(OC3OC4COC(OC4C(O)C3O)C)C5=CC=6OCOC6C=C5C(C7=CC(OC)=C(O)C(OC)=C7)C12	rgb(128, 128, 128)	97.02409:17 99.04733:56 122.4225:26 127.0381:43 128.04401:36 143.0352:36 143.07021:18 144.0611:50 145.04691:36 147.0573:19 150.10539:17 154.0535:63 154.065:25 155.0723:43 167.0687:31 167.0791:32 171.0631:39 173.06149:377 174.0594:25 174.06779:22 184.1866:34 185.0592:3816 186.0592:205 186.06799:155 186.1832:17 189.00681:20 189.07291:17 189.0871:23 191.4183:19 199.0323:82 199.04919:25 201.0498:58 2…
00034_Convolvamine; PlaSMA ID-1596	Annotation level-1; PlaSMA ID-1596; ID title-Convolvamine; Max plant tissue-Standard only	34	Convolvamine; PlaSMA ID-1596	3.95	306.17	[M+H]+	C17H23NO4		AEFPCFUCFQBXDQ-UHFFFAOYNA-N	O=C(OC1CC2N(C)C(CC2)C1)C3=CC=C(OC)C(OC)=C3	rgb(128, 128, 128)	65.04013:17 65.97453:24 67.05212:17 68.04951:22 68.26402:19 70.07254:21 77.0377:180 77.72333:18 78.04349:27 79.0563:35 79.74686:18 82.06678:39 90.50641:18 91.05847:342 92.05866:21 92.71319:17 93.05044:30 93.05543:65 93.0709:3344 93.6473:19 94.04758:20 94.07078:250 94.07768:208 95.06405:33 95.07384:105 95.08595:175 95.09239:62 96.0804:181 96.09235:60 96.10014:27 108.0773:18 108.0905:26 119.2359:25…
00035_Tabersonine; PlaSMA ID-1848	Annotation level-1; PlaSMA ID-1848; ID title-Tabersonine; Max plant tissue-Standard only	35	Tabersonine; PlaSMA ID-1848	5.2	337.191	[M+H]+	C21H24N2O2		FNGGIPWAZSFKCN-UHFFFAOYNA-N	O=C(OC)C1=C2NC=3C=CC=CC3C24CCN5CC=CC(C1)(CC)C54	rgb(128, 128, 128)	67.05489:101 68.04468:27 79.05322:58 80.04391:55 80.05216:25 81.03942:19 81.04654:33 81.06523:39 81.07278:52 82.06312:21 91.05352:83 91.06052:78 92.04981:29 93.05652:163 93.07246:177 94.05977:32 94.0656:34 94.07887:27 95.07355:28 96.08611:47 103.0558:46 105.0694:25 106.0474:44 106.0651:74 107.014:28 107.0713:250 107.075:114 107.0851:50 107.094:27 108.0816:426 108.8176:30 109.0888:17 109.1021:64 1…
00036_Neocuproine; PlaSMA ID-731	Annotation level-1; PlaSMA ID-731; ID title-Neocuproine; Max plant tissue-Standard only	36	Neocuproine; PlaSMA ID-731	3.47	209.107	[M+H]+	C14H12N2		IYRGXJIJGHOCFS-UHFFFAOYSA-N	N=1C(=CC=C2C=CC=3C=CC(=NC3C12)C)C	rgb(128, 128, 128)	60.24256:18 79.38717:17 107.3348:38 114.0497:23 115.0582:76 117.0593:21 123.7946:37 125.043:17 128.0659:61 129.0713:24 131.0777:18 131.33479:17 132.22749:33 138.0479:27 139.0573:107 139.06911:35 139.67:18 140.0518:101 140.0616:35 141.065:43 142.07179:89 143.0708:193 144.2001:19 145.1279:23 145.9426:37 146.32581:21 151.05141:21 151.0614:22 152.05389:19 153.06799:41 153.7796:20 154.06261:19 154.069…
00037_Ormosanine; PlaSMA ID-1695	Annotation level-1; PlaSMA ID-1695; ID title-Ormosanine; Max plant tissue-Standard only	37	Ormosanine; PlaSMA ID-1695	2.24	318.29	[M+H]+	C20H35N3		YUKCLPPRYNXRAF-UHFFFAOYNA-N	N1CCCCC1C23CN4CCCCC4C(CC5CCCNC52)C3	rgb(128, 128, 128)	67.05746:24 70.06801:29 83.08823:41 84.07053:33 84.0792:54 84.08387:94 84.92821:17 96.07525:35 96.08182:82 98.08945:26 98.09593:102 98.10564:39 99.10371:25 105.0744:20 109.1043:45 110.0989:17 120.6016:18 124.114:17 136.1113:57 148.11189:29 156.09489:18 157.10001:18 160.1217:30 176.6281:26 195.8129:22 204.1573:42 209.20979:46 212.2648:27 219.1931:31 221.19389:19 221.2086:36 224.6526:17 233.1873:39…
00038_Napelline; PlaSMA ID-2016	Annotation level-1; PlaSMA ID-2016; ID title-Napelline; Max plant tissue-Standard only	38	Napelline; PlaSMA ID-2016	3.05	360.253	[M+H]+	C22H33NO3		AZAZKLKDEOMJBJ-UHFFFAOYNA-N	OC1C(=C)C2CC13C4CC5C6(C)CN(CC)C4C5(C(O)CC6)C3CC2O	rgb(128, 128, 128)	56.05287:60 58.06053:20 58.06918:47 59.35245:21 60.15585:17 72.07943:23 79.05445:91 82.06369:27 83.0491:18 84.07877:64 85.08624:25 91.05472:47 91.06271:18 91.72173:22 93.07383:60 95.08121:21 95.08704:49 97.06728:18 97.08247:26 98.09637:99 98.09964:50 99.09915:20 105.0546:17 105.0683:69 105.0739:38 106.0709:25 107.0449:24 107.0886:258 109.1009:59 110.0921:45 110.1035:80 110.9822:20 115.0443:23 117…
00039_Sinomenine; PlaSMA ID-1786	Annotation level-1; PlaSMA ID-1786; ID title-Sinomenine; Max plant tissue-Standard only	39	Sinomenine; PlaSMA ID-1786	3.03	330.17	[M+H]+	C19H23NO4		INYYVPJSBIVGPH-UHFFFAOYNA-N	O=C1C(OC)=CC2C3N(C)CCC2(C4=C(O)C(OC)=CC=C4C3)C1	rgb(128, 128, 128)	53.03833:32 55.02122:37 57.03531:24 58.0588:20 58.06403:62 58.06718:110 58.38213:24 59.05012:26 59.06378:18 70.06683:20 71.0465:27 79.05443:22 83.05144:55 85.0265:19 91.04449:42 91.05576:92 96.08035:89 97.06256:17 98.34477:19 100.0751:27 101.0627:21 107.048:25 110.0585:29 115.0558:18 116.2573:24 117.0701:19 118.061:34 119.0534:124 120.0444:21 122.0428:33 122.0796:25 122.152:17 123.0403:33 123.080…
00040_Convolidine; PlaSMA ID-1320	Annotation level-1; PlaSMA ID-1320; ID title-Convolidine; Max plant tissue-Standard only	40	Convolidine; PlaSMA ID-1320	3.27	278.139	[M+H]+	C15H19NO4		GWWGRYGNRKFSSX-UHFFFAOYNA-N	O=C(OC1CC2NC(CC2)C1)C3=CC=C(O)C(OC)=C3	rgb(128, 128, 128)	55.01847:18 56.04664:24 65.03602:18 65.0423:19 67.04725:18 67.05672:106 77.03947:475 80.02797:23 81.06599:24 82.02876:27 82.43488:40 84.07896:24 91.05424:852 92.0583:137 92.84402:18 93.03051:35 93.03558:59 93.07001:4916 93.39956:28 94.03717:20 94.04479:25 94.07491:508 95.04874:17 96.81488:37 105.6044:17 108.0238:49 108.9181:18 109.0211:49 109.0279:28 109.0683:30 110.0962:3947 111.0778:23 111.0841…
00041_Matrine; PlaSMA ID-1050	Annotation level-1; PlaSMA ID-1050; ID title-Matrine; Max plant tissue-Standard only	41	Matrine; PlaSMA ID-1050	2.26	249.196	[M+H]+	C15H24N2O		ZSBXGIUJOOQZMP-UHFFFAOYNA-N	O=C1N2CC3CCCN4CCCC(C2CCC1)C43	rgb(128, 128, 128)	54.98681:46 68.13869:18 79.04912:25 83.06296:23 93.07039:44 96.07872:61 98.06361:25 98.09387:22 98.102:22 99.09551:17 100.0782:18 105.0661:21 107.0553:22 107.0696:21 107.0782:19 108.0772:27 108.0838:50 109.0693:33 109.1041:22 110.0844:42 110.0923:171 110.0993:86 111.098:20 112.0598:22 112.0666:30 112.0766:170 112.116:20 115.1017:32 117.0626:22 117.7787:21 119.0806:19 120.0778:90 120.0894:23 121.0…
00042_Koumidine; PlaSMA ID-1509	Annotation level-1; PlaSMA ID-1509; ID title-Koumidine; Max plant tissue-Standard only	42	Koumidine; PlaSMA ID-1509	3.58	295.18	[M+H]+	C19H22N2O		VXTDUGOBAOLMED-UHFFFAOYNA-N	OCC1C2C(=CC)CN3C(C=4NC=5C=CC=CC5C4CC31)C2	rgb(128, 128, 128)	55.01755:20 58.0662:23 71.0459:28 72.12263:20 75.01463:17 79.0533:24 81.06993:34 82.05396:26 82.06893:37 84.08385:83 86.0602:35 86.11031:21 87.82236:18 91.05586:203 91.49139:17 92.04797:21 93.05563:23 93.06077:70 93.06745:96 94.04452:30 94.06413:90 94.97451:17 95.08816:24 96.07785:33 96.08245:35 96.09306:25 98.09697:18 103.0521:67 104.0582:29 105.0284:22 105.0687:35 106.0611:56 106.0674:58 106.83…
00043_Gardnutine; PlaSMA ID-1731	Annotation level-1; PlaSMA ID-1731; ID title-Gardnutine; Max plant tissue-Standard only	43	Gardnutine; PlaSMA ID-1731	4.42	323.175	[M+H]+	C20H22N2O2		XJTWLFBHBFSVRS-UHFFFAOYNA-N	O(C=1C=CC2=C(C1)NC3=C2C4OCC5C6C(=CC)CN(C3C6)C45)C	rgb(128, 128, 128)	56.05103:23 67.05805:31 68.05015:37 72.0816:30 77.0261:26 77.03335:20 77.04303:77 79.05238:19 80.04526:40 80.0508:54 81.05595:25 82.06371:18 89.03735:23 90.04581:26 91.05247:277 91.05844:50 92.04715:77 93.03838:24 93.05111:39 93.05841:268 93.06487:342 93.07172:451 94.03873:20 94.05423:36 94.06525:908 94.07629:33 94.65021:18 95.05061:34 95.07172:59 95.0852:29 95.38675:18 96.09141:40 96.39106:57 96…
00044_Gardnerine; PlaSMA ID-1752	Annotation level-1; PlaSMA ID-1752; ID title-Gardnerine; Max plant tissue-Standard only	44	Gardnerine; PlaSMA ID-1752	3.68	325.191	[M+H]+	C20H24N2O2		RBALEJFQJCAPLN-UHFFFAOYNA-N	OCC1C2C(=CC)CN3C(C=4NC=5C=C(OC)C=CC5C4CC31)C2	rgb(128, 128, 128)	61.60199:17 68.04654:19 68.06025:28 79.05065:28 80.04604:39 82.06469:26 83.08412:27 84.07979:66 86.04878:21 89.4557:18 91.0535:27 93.05814:82 93.06867:29 94.06393:34 95.08504:38 96.07469:31 97.44123:18 97.92088:18 98.09286:46 100.914:22 101.1277:52 105.067:35 105.0755:44 106.0598:65 106.0645:19 107.0845:58 107.935:18 108.0664:29 108.0803:2019 108.1046:19 109.0659:105 109.084:179 109.0933:25 110.0…
00045_Hydroxygardnutine; PlaSMA ID-1859	Annotation level-1; PlaSMA ID-1859; ID title-Hydroxygardnutine; Max plant tissue-Standard only	45	Hydroxygardnutine; PlaSMA ID-1859	3.6	339.17	[M+H]+	C20H22N2O3		OUONWRIEOZGMSQ-UHFFFAOYNA-N	OCC=C1CN2C3C=4NC=5C=C(OC)C=CC5C4C6OCC(C1C3)C26	rgb(128, 128, 128)	54.91839:20 71.0489:60 72.04321:33 77.03728:139 77.69829:27 79.05402:52 79.05971:51 80.05152:41 80.4989:19 85.06525:27 89.61796:21 91.04823:55 91.0571:96 92.03017:47 92.04726:18 93.06667:73 93.07345:32 94.0632:27 94.06796:25 96.08115:201 97.06348:71 98.28498:19 99.15407:24 103.035:26 103.0457:62 103.0536:453 104.0553:33 104.0653:21 106.0468:45 106.0654:1018 106.0752:63 106.712:21 107.0634:31 108.…
00046_Senecionine; PlaSMA ID-1833	Annotation level-1; PlaSMA ID-1833; ID title-Senecionine; Max plant tissue-Standard only	46	Senecionine; PlaSMA ID-1833	3.8	336.18	[M+H]+	C18H25NO5		HKODIGSRFALUTA-UHFFFAOYNA-N	O=C1OC2CCN3CC=C(COC(=O)C(O)(C)C(C)CC1=CC)C32	rgb(128, 128, 128)	65.60855:18 67.05795:37 79.05433:55 80.04261:19 80.04669:24 81.07098:19 81.07567:24 82.06617:34 91.0561:18 93.07038:100 93.99205:32 94.05363:61 94.06512:487 96.07933:22 96.08637:23 97.1405:21 103.0536:57 105.0741:29 107.0835:19 107.0901:42 108.0426:22 108.0784:23 108.0872:37 109.0624:18 109.1043:19 110.1006:17 117.0573:20 118.0571:20 120.081:537 121.0616:17 121.0821:20 121.0909:44 121.4605:17 122…
00047_Retrorsine; PlaSMA ID-1937	Annotation level-1; PlaSMA ID-1937; ID title-Retrorsine; Max plant tissue-Standard only	47	Retrorsine; PlaSMA ID-1937	3.23	352.175	[M+H]+	C18H25NO6		BCJMNZRQJAVDLD-UHFFFAOYNA-N	O=C1OC2CCN3CC=C(COC(=O)C(O)(CO)C(C)CC1=CC)C32	rgb(128, 128, 128)	55.05653:29 67.0547:56 68.0442:17 68.06122:29 77.03921:18 79.05269:41 80.04794:72 80.05699:20 81.05076:20 81.07027:69 81.37701:17 82.06886:19 83.05357:35 84.04624:22 84.07886:21 91.04575:24 91.0531:227 91.06331:17 92.04756:87 92.05599:51 93.05795:19 93.06347:54 93.07138:127 94.06563:575 94.07365:60 95.04449:17 95.05027:28 95.07226:54 95.08738:124 95.09626:20 96.07135:102 96.08222:137 103.0458:25 …
00048_Puberanidine; PlaSMA ID-2818	Annotation level-1; PlaSMA ID-2818; ID title-Puberanidine; Max plant tissue-Standard only	48	Puberanidine; PlaSMA ID-2818	4.95	543.307	[M+H]+	C30H42N2O7		VSUODASNSRJNCP-UHFFFAOYNA-N	O=C(OC12CN(CC)C3C4CC1C3(C(OC)CC2)C5CC6C(OC)CC4(O)C5(O)C6OC)C=7C=CC=CC7N	rgb(128, 128, 128)	58.06581:144 60.53289:19 70.82323:18 71.04686:43 72.08241:37 75.04724:106 75.2021:18 76.52938:39 79.05453:30 79.84616:27 84.08272:28 85.06101:19 85.27053:17 87.0502:39 88.0722:44 92.05628:24 93.06959:26 95.06812:33 96.07681:20 97.08721:20 98.06221:25 101.0605:124 105.0678:33 105.3365:22 107.0514:54 108.0773:21 109.0558:26 109.0624:23 113.0573:53 115.0525:30 117.0493:24 117.0699:69 120.0442:1230 1…
00049_Coralyne; PlaSMA ID-2030	Annotation level-1; PlaSMA ID-2030; ID title-Coralyne; Max plant tissue-Standard only	49	Coralyne; PlaSMA ID-2030	5.27	364.154	[M]+	C22H22NO4		GOEJQGGEIVSVOK-UHFFFAOYSA-N	O(C=1C=C2C=C[N+]=3C(=CC=4C=C(OC)C(OC)=CC4C3C)C2=CC1OC)C	rgb(128, 128, 128)	113.025:26 118.0769:28 121.6547:41 123.5723:25 137.97321:23 161.04359:24 194.0759:18 200.0816:17 204.8011:17 210.4135:28 214.8212:25 216.08681:33 216.978:18 218.0463:18 219.8026:25 222.2515:25 224.3167:28 224.90849:18 228.0916:29 230.1003:20 233.0836:20 235.86011:20 241.3849:17 242.09779:22 246.1032:25 247.0645:31 247.1006:356 248.1058:42 249.24249:18 250.862:27 250.97881:21 259.09909:27 259.1093…
00050_Isoformosanine; PlaSMA ID-2062	Annotation level-1; PlaSMA ID-2062; ID title-Isoformosanine; Max plant tissue-Standard only	50	Isoformosanine; PlaSMA ID-2062	4.42	369.181	[M+H]+	C21H24N2O4		JMIAZDVHNCCPDM-UHFFFAOYNA-N	O=C(OC)C1=COC(C)C2CN3CCC4(C(=O)NC=5C=CC=CC54)C3CC12	rgb(128, 128, 128)	51.80405:21 55.04924:17 55.05372:39 55.05921:72 70.02777:35 71.25488:25 76.09583:25 79.05022:45 80.04848:63 80.85612:55 81.04874:34 81.07069:70 82.02496:29 82.06385:22 83.07604:25 91.03492:18 93.0677:18 94.03299:34 94.06236:30 95.03738:18 95.08298:31 96.04095:22 96.06418:53 96.07691:22 103.4164:21 104.0524:28 104.5891:21 105.0685:56 107.0668:31 107.0736:18 108.0467:48 108.0706:18 108.0808:237 108…
00051_Mitraphylline; PlaSMA ID-2063	Annotation level-1; PlaSMA ID-2063; ID title-Mitraphylline; Max plant tissue-Standard only	51	Mitraphylline; PlaSMA ID-2063	4.37	369.181	[M+H]+	C21H24N2O4		JMIAZDVHNCCPDM-UHFFFAOYNA-N	O=C(OC)C1=COC(C)C2CN3CCC4(C(=O)NC=5C=CC=CC54)C3CC12	rgb(128, 128, 128)	56.04924:23 68.04769:26 77.0344:20 79.05524:22 80.04249:20 80.79046:31 81.05434:51 81.06865:117 81.07655:26 82.06118:83 83.01443:88 91.05489:27 95.04831:22 96.07994:18 97.06156:20 99.12279:21 104.041:25 104.4524:25 105.0306:28 105.0676:133 106.0552:18 106.061:54 107.0872:36 108.0093:20 108.044:97 108.0679:31 108.0813:793 108.7456:22 108.9523:22 109.0436:66 109.0511:21 109.0656:28 109.0771:43 109.…
00052_Pteropodine; PlaSMA ID-2064	Annotation level-1; PlaSMA ID-2064; ID title-Pteropodine; Max plant tissue-Standard only	52	Pteropodine; PlaSMA ID-2064	4.24	369.181	[M+H]+	C21H24N2O4		JMIAZDVHNCCPDM-UHFFFAOYNA-N	O=C(OC)C1=COC(C)C2CN3CCC4(C(=O)NC=5C=CC=CC54)C3CC12	rgb(128, 128, 128)	55.05422:42 56.03811:20 56.04863:54 58.06413:21 67.0551:19 68.04572:35 68.05459:29 70.05862:70 70.06384:56 70.38117:28 79.05215:41 80.04935:110 80.06236:27 81.03101:32 81.0566:18 81.06406:87 83.04845:37 84.08602:74 94.37083:19 95.04317:34 95.07402:39 96.07703:28 97.04442:24 98.06039:27 103.0492:21 103.7237:30 104.0467:43 104.1202:43 105.0263:20 105.0597:22 105.0704:85 106.0561:17 106.0642:48 106.…
00053_Formosanine; PlaSMA ID-2065	Annotation level-1; PlaSMA ID-2065; ID title-Formosanine; Max plant tissue-Standard only	53	Formosanine; PlaSMA ID-2065	4.33	369.181	[M+H]+	C21H24N2O4		JMIAZDVHNCCPDM-UHFFFAOYNA-N	O=C(OC)C1=COC(C)C2CN3CCC4(C(=O)NC=5C=CC=CC54)C3CC12	rgb(128, 128, 128)	51.01771:57 74.117:26 79.31239:23 81.05553:18 83.00903:41 83.01741:41 84.08595:35 90.0444:20 91.05521:20 93.06255:37 93.07105:38 94.07604:20 95.05112:36 95.0751:21 96.36036:24 97.07069:20 97.08054:35 100.1611:24 104.031:31 104.991:21 105.0503:45 105.0677:76 106.0594:17 106.7433:17 106.7918:17 107.0478:33 108.0452:17 108.0581:59 108.0791:740 108.0955:66 109.0409:17 109.0642:114 109.0881:95 110.096…
00054_Speciophylline; PlaSMA ID-2066	Annotation level-1; PlaSMA ID-2066; ID title-Speciophylline; Max plant tissue-Standard only	54	Speciophylline; PlaSMA ID-2066	4.93	369.181	[M+H]+	C21H24N2O4		JMIAZDVHNCCPDM-UHFFFAOYNA-N	O=C(OC)C1=COC(C)C2CN3CCC4(C(=O)NC=5C=CC=CC54)C3CC12	rgb(128, 128, 128)	56.05173:30 70.54898:17 72.054:27 77.03571:27 78.04066:60 79.05388:60 80.04993:285 80.05376:105 81.05582:20 81.06062:38 81.07008:123 82.06421:20 84.04086:20 84.6542:18 85.06834:37 87.04732:39 88.49907:33 91.04285:44 91.06141:47 93.05799:20 93.06759:26 93.07365:45 93.4008:17 94.07185:21 94.07726:25 94.57914:17 95.05542:41 95.06911:30 95.0834:17 97.02664:19 98.09373:21 98.27766:23 103.4252:22 105.0…
00055_Speciofiline; PlaSMA ID-2067	Annotation level-1; PlaSMA ID-2067; ID title-Speciofiline; Max plant tissue-Standard only	55	Speciofiline; PlaSMA ID-2067	4.09	369.181	[M+H]+	C21H24N2O4		JMIAZDVHNCCPDM-UHFFFAOYNA-N	O=C(OC)C1=COC(C)C2CN3CCC4(C(=O)NC=5C=CC=CC54)C3CC12	rgb(128, 128, 128)	55.05495:91 56.0517:43 57.7899:39 58.16655:31 60.44495:26 68.04675:21 69.68512:39 70.06562:280 71.95996:19 79.01727:28 79.05608:20 80.05083:135 81.06933:40 81.07542:31 82.06787:41 82.08453:17 84.08033:41 86.08975:18 94.06599:35 95.04757:84 95.06512:25 95.08746:52 96.04468:21 96.04906:29 97.87469:23 98.09344:28 103.2671:20 104.0451:33 105.0651:31 105.0739:22 106.0617:67 107.0759:22 108.0365:63 108…
00056_Rhynchophylline; PlaSMA ID-2129	Annotation level-1; PlaSMA ID-2129; ID title-Rhynchophylline; Max plant tissue-Standard only	56	Rhynchophylline; PlaSMA ID-2129	4.9	385.212	[M+H]+	C22H28N2O4		DAXYUDFNWXHGBE-UHFFFAOYNA-N	O=C(OC)C(=COC)C1CC2N(CCC32C(=O)NC=4C=CC=CC43)CC1CC	rgb(128, 128, 128)	56.04921:62 58.06371:41 67.05463:21 68.40606:36 70.05354:21 70.06522:493 70.10793:17 70.31246:37 70.34657:31 70.92419:17 71.06759:46 75.04104:57 87.03863:20 91.0506:34 91.65977:20 91.95383:20 93.053:49 93.06857:124 94.06226:20 94.07044:22 95.08852:25 107.0447:32 108.0803:576 108.0925:38 109.0712:28 109.0869:54 110.0479:34 110.0564:44 110.0956:1908 110.8267:21 111.0804:45 111.0898:30 111.1:178 112…
00057_Isorhynchophylline; PlaSMA ID-2130	Annotation level-1; PlaSMA ID-2130; ID title-Isorhynchophylline; Max plant tissue-Standard only	57	Isorhynchophylline; PlaSMA ID-2130	4.63	385.212	[M+H]+	C22H28N2O4		DAXYUDFNWXHGBE-UHFFFAOYNA-N	O=C(OC)C(=COC)C1CC2N(CCC32C(=O)NC=4C=CC=CC43)CC1CC	rgb(128, 128, 128)	56.05056:56 56.62207:18 59.05064:24 66.46705:18 68.04738:19 69.26389:32 70.06456:116 70.15305:19 73.70808:26 75.04453:19 79.05332:31 81.06743:21 81.07251:18 82.062:26 82.06996:61 83.81644:20 84.07333:26 84.08366:30 85.0293:24 85.0839:38 91.04742:37 91.05678:177 91.46555:37 91.57078:18 91.83591:33 92.76518:18 93.03594:36 93.06553:52 93.07246:144 94.06497:82 94.07394:62 95.0409:36 95.08592:27 96.02…
00058_Isomajdine; PlaSMA ID-2326	Annotation level-1; PlaSMA ID-2326; ID title-Isomajdine; Max plant tissue-Standard only	58	Isomajdine; PlaSMA ID-2326	4.48	429.202	[M+H]+	C23H28N2O6		TTZWEOINXHJHCY-UHFFFAOYNA-N	O=C(OC)C1=COC(C)C2CN3CCC4(C(=O)NC5=C(OC)C(OC)=CC=C54)C3CC12	rgb(128, 128, 128)	56.05183:22 57.96324:18 58.0626:23 58.06753:36 63.25345:22 68.0498:25 70.06617:238 70.5891:22 71.53242:25 75.12778:26 75.58562:23 79.05309:27 80.05045:187 82.06596:20 87.04501:50 87.3844:47 89.92816:27 93.05991:41 93.07373:51 93.62637:27 95.05214:54 95.08382:27 96.01996:36 96.05087:25 96.08066:54 97.02621:32 103.0565:18 103.1429:20 105.0722:40 106.0619:54 107.0618:20 107.0722:30 108.0463:39 108.0…
00059_Catharanthine; PlaSMA ID-1849	Annotation level-1; PlaSMA ID-1849; ID title-Catharanthine; Max plant tissue-Standard only	59	Catharanthine; PlaSMA ID-1849	5.04	337.191	[M+H]+	C21H24N2O2		CMKFQVZJOWHHDV-UHFFFAOYNA-N	O=C(OC)C12C=3NC=4C=CC=CC4C3CCN5CC(C=C(CC)C51)C2	rgb(128, 128, 128)	59.00498:17 59.01392:92 59.01886:41 77.03976:70 79.05661:19 90.17036:24 91.05189:70 91.05663:66 92.06187:23 93.04673:35 93.06397:330 93.07084:1537 94.07353:185 95.80909:18 100.4664:24 105.0706:77 107.0871:22 109.5076:23 110.0986:25 110.1428:35 117.0552:40 117.0702:152 119.0901:17 125.0395:23 125.9101:49 127.0601:43 128.04359:25 129.06931:27 129.07629:68 130.0675:26 131.0824:49 133.0657:532 134.06…
00060_Voacristine; PlaSMA ID-2128	Annotation level-1; PlaSMA ID-2128; ID title-Voacristine; Max plant tissue-Standard only	60	Voacristine; PlaSMA ID-2128	4.61	385.212	[M+H]+	C22H28N2O4		OYMQKBZMKFJPMH-UHFFFAOYNA-N	O=C(OC)C12C=3NC=4C=CC(OC)=CC4C3CCN5CC(CC(C(O)C)C51)C2	rgb(128, 128, 128)	67.05544:33 68.04795:23 77.01954:26 82.07128:32 83.95536:25 87.04761:30 91.04808:28 91.05494:84 93.05049:27 93.07171:132 94.06615:31 95.09369:30 96.08024:69 96.24556:45 98.09004:46 99.10497:17 101.7852:17 106.0652:24 107.071:37 107.0835:36 107.0888:103 107.1176:30 107.288:24 108.0428:17 108.0514:42 108.0796:125 108.0983:27 109.0817:18 109.0983:22 110.0885:18 110.0994:214 111.1115:21 119.0873:114 …
00061_7alpha-Voacangine hydroxyindolenine; PlaSMA ID-2131	Annotation level-1; PlaSMA ID-2131; ID title-7alpha-Voacangine hydroxyindolenine; Max plant tissue-Standard only	61	7alpha-Voacangine hydroxyindolenine; PlaSMA ID-2131	4.01	385.212	[M+H]+	C22H28N2O4		AVRFPRAAVSCSSZ-UHFFFAOYNA-N	O=C(OC)C12C3=NC=4C=CC(OC)=CC4C3(O)CCN5CC(CC(CC)C51)C2	rgb(128, 128, 128)	55.8187:29 64.24379:29 67.05611:30 68.04821:119 79.05754:78 80.04715:49 80.05879:24 81.05694:17 82.066:112 83.06728:51 84.08201:35 91.0362:54 91.05031:42 91.0555:51 91.06091:30 93.03339:63 93.0689:75 94.02883:40 94.03779:18 94.05928:38 94.06817:17 95.65255:17 96.0814:20 98.10143:22 99.13071:24 103.0596:18 105.0547:30 105.0609:35 105.0692:23 106.0615:41 107.0353:19 107.0521:42 107.0806:32 108.0699…
00062_(+)-Chelidonine; PlaSMA ID-1960	Annotation level-1; PlaSMA ID-1960; ID title-(+)-Chelidonine; Max plant tissue-Standard only	62	(+)-Chelidonine; PlaSMA ID-1960	4.53	354.134	[M+H]+	C20H19NO5		GHKISGDRQRSCII-UHFFFAOYNA-N	OC1CC2=CC=3OCOC3C=C2C4N(C)CC5=C6OCOC6=CC=C5C14	rgb(128, 128, 128)	79.05844:19 87.67391:20 118.0664:20 131.04919:57 132.0488:25 133.0284:21 135.0302:43 135.0416:405 135.0473:249 136.0374:20 136.0452:83 139.1656:18 143.0365:25 143.0462:140 144.0542:17 146.0584:75 147.0392:22 147.06039:18 147.076:17 148.0468:24 148.0554:19 149.02049:20 149.05299:24 151.03819:57 151.0481:17 151.9062:23 159.04449:153 160.07651:37 161.05949:392 163.0184:27 163.02769:93 163.0396:593 1…
00063_(+)-Chelidonine; PlaSMA ID-1961	Annotation level-1; PlaSMA ID-1961; ID title-(+)-Chelidonine; Max plant tissue-Standard only	63	(+)-Chelidonine; PlaSMA ID-1961	4.52	354.134	[M+H]+	C20H19NO5		GHKISGDRQRSCII-UHFFFAOYNA-N	OC1CC2=CC=3OCOC3C=C2C4N(C)CC5=C6OCOC6=CC=C5C14	rgb(128, 128, 128)	79.05326:40 93.07742:33 103.0587:17 115.0525:20 115.0591:19 116.0597:24 118.0623:20 118.0724:45 119.0618:17 123.0441:17 131.0519:25 131.07961:22 134.0311:19 134.9921:19 135.0229:19 135.045:1206 135.0607:50 136.0472:202 137.0463:39 143.047:22 143.0533:47 143.0614:33 144.0571:19 146.06239:74 147.0442:52 149.0211:18 149.0287:57 149.0385:17 149.0573:96 149.84109:20 151.00549:31 151.026:21 151.58411:2…
00064_Harmane; PlaSMA ID-516	Annotation level-1; PlaSMA ID-516; ID title-Harmane; Max plant tissue-Standard only	64	Harmane; PlaSMA ID-516	3.7	183.092	[M+H]+	C12H10N2		PSFDQSOCUJVVGF-UHFFFAOYSA-N	N=1C=CC=2C=3C=CC=CC3NC2C1C	rgb(128, 128, 128)	66.03642:22 89.03959:22 111.8104:33 114.0436:35 115.0308:60 115.055:2839 115.0971:29 116.0533:135 116.0602:227 117.0497:48 117.3344:27 127.049:36 128.0222:56 128.05499:41 128.0659:80 129.0582:42 129.0658:53 130.0692:27 139.0528:47 140.0486:62 140.05499:41 140.8161:28 141.0524:38 141.05679:95 141.9828:17 142.0665:587 143.0686:24 143.07471:18 145.5401:20 148.3206:17 148.8629:22 150.9261:17 152.0442…
00065_Ethylbeta-carboline; PlaSMA ID-628	Annotation level-1; PlaSMA ID-628; ID title-Ethylbeta-carboline; Max plant tissue-Standard only	65	Ethylbeta-carboline; PlaSMA ID-628	4.01	197.107	[M+H]+	C13H12N2		YTQRHYCHEIXUIU-UHFFFAOYSA-N	N=1C=CC=2C=3C=CC=CC3NC2C1CC	rgb(128, 128, 128)	110.7745:17 111.8712:25 115.0472:91 115.0545:257 115.0622:81 116.051:24 116.0609:18 127.0506:47 128.0455:73 128.05721:57 128.83389:17 129.0547:52 129.07291:23 130.0631:25 131.07091:24 133.3812:26 134.446:29 137.85899:43 138.424:28 138.65021:25 140.0515:54 140.0567:22 140.48759:36 141.0607:20 141.9502:20 142.0591:70 142.067:82 147.649:17 153.0354:21 154.06709:983 154.8669:21 155.052:23 155.0703:60…
00066_Harmol; PlaSMA ID-645	Annotation level-1; PlaSMA ID-645; ID title-Harmol; Max plant tissue-Standard only	66	Harmol; PlaSMA ID-645	3.18	199.087	[M+H]+	C12H10N2O		SATMZMMKDDTOSQ-UHFFFAOYSA-N	OC=1C=CC2=C(C1)NC3=C2C=CN=C3C	rgb(128, 128, 128)	77.0379:20 77.04206:32 86.39227:25 91.04726:18 103.0273:19 103.0526:302 104.0618:30 108.0533:24 115.0518:18 115.059:17 116.9911:22 117.0551:24 117.4471:28 119.0706:29 124.7958:24 127.0622:21 128.049:17 129.0547:94 129.0672:61 130.0506:28 130.05969:21 130.06911:50 130.07671:37 131.02361:18 131.04559:316 131.0515:783 132.04919:165 132.0601:96 140.05119:102 140.53551:26 141.3683:21 141.92889:22 142.…
00067_Harmalol; PlaSMA ID-658	Annotation level-1; PlaSMA ID-658; ID title-Harmalol; Max plant tissue-Standard only	67	Harmalol; PlaSMA ID-658	3.06	201.102	[M+H]+	C12H12N2O		CRQDWQWZCNKKAC-UHFFFAOYSA-N	O=C1C=CC=2C(=C1)NC3=C(NCCC23)C	rgb(128, 128, 128)	57.48977:18 65.03926:18 68.05022:272 68.64793:20 69.0515:27 79.05057:34 90.04521:74 91.04932:46 91.05912:20 97.94849:17 103.0559:19 105.0304:20 105.0593:23 105.0726:36 105.5179:18 109.0585:28 113.0361:32 115.0536:215 116.0565:21 117.0534:67 117.0591:78 117.065:33 117.7724:18 118.0074:17 118.0633:49 118.0693:70 127.0523:32 127.7867:20 128.0544:130 128.067:58 129.0517:73 129.06799:68 130.0675:54 13…
00068_Harmine; PlaSMA ID-781	Annotation level-1; PlaSMA ID-781; ID title-Harmine; Max plant tissue-Standard only	68	Harmine; PlaSMA ID-781	4.11	213.102	[M+H]+	C13H12N2O		BXNJHAXVSOCGBA-UHFFFAOYSA-N	N=1C=CC=2C=3C=CC(OC)=CC3NC2C1C	rgb(128, 128, 128)	93.06199:19 102.0445:18 118.0662:18 121.9023:18 128.04829:58 128.8085:20 130.0667:24 135.6111:21 142.0486:18 142.0705:21 143.0705:43 143.08141:48 144.0573:18 144.0657:55 144.08099:207 145.0721:20 145.0833:21 145.76781:28 146.0779:24 146.9631:18 147.78729:17 152.04671:23 152.3316:17 154.06329:23 155.0511:23 155.0587:51 155.06911:20 156.0593:23 156.0666:26 157.71471:17 165.2672:24 167.0515:17 168.0…
00069_Gelsemine; PlaSMA ID-1732	Annotation level-1; PlaSMA ID-1732; ID title-Gelsemine; Max plant tissue-Standard only	69	Gelsemine; PlaSMA ID-1732	3.21	323.175	[M+H]+	C20H22N2O2		NFYYATWFXNPTRM-UHFFFAOYNA-N	O=C1NC=2C=CC=CC2C13C4OCC5C6N(C)CC(C=C)(C5C4)C63	rgb(128, 128, 128)	70.05073:18 70.05819:182 70.06472:1476 70.26843:20 70.97995:25 71.06813:209 72.05793:20 72.08033:29 83.04895:38 86.06046:222 88.07391:142 88.0789:106 90.98849:31 91.05065:64 91.05621:54 93.06493:21 94.06:20 96.08168:21 102.0695:19 103.0526:41 104.05:30 105.0612:72 105.0729:65 105.3366:17 106.0695:27 107.0609:28 108.0802:72 108.4495:25 109.0811:25 112.0731:20 115.0476:58 115.0527:25 116.0539:24 11…
00070_Gelsevirine; PlaSMA ID-1945	Annotation level-1; PlaSMA ID-1945; ID title-Gelsevirine; Max plant tissue-Standard only	70	Gelsevirine; PlaSMA ID-1945	4.05	353.186	[M+H]+	C21H24N2O3		SSSCMFCWHWCCEH-UHFFFAOYNA-N	O=C1N(OC)C=2C=CC=CC2C13C4OCC5C6N(C)CC(C=C)(C5C4)C63	rgb(128, 128, 128)	57.06076:38 58.0636:30 68.03913:32 68.04841:38 69.03091:17 70.03762:17 70.04263:22 70.0604:70 70.0647:165 70.06935:37 71.73114:20 74.05323:29 82.05951:32 83.06446:26 83.06994:38 84.07928:69 84.08325:55 86.05504:31 86.05946:60 87.06699:28 87.44157:17 88.07347:26 93.05479:24 94.05954:44 94.06741:68 95.05804:24 95.06906:27 95.07323:35 96.08318:38 97.08851:25 98.06396:28 99.07318:18 100.0747:162 106.…
00071_Humantenine; PlaSMA ID-1984	Annotation level-1; PlaSMA ID-1984; ID title-Humantenine; Max plant tissue-Standard only	71	Humantenine; PlaSMA ID-1984	4.63	355.202	[M+H]+	C21H26N2O3		SJKRPUOXUNOPOP-UHFFFAOYNA-N	O=C1N(OC)C=2C=CC=CC2C13CC4N(C)CC(=CC)C5CC3OCC54	rgb(128, 128, 128)	57.06054:31 68.04132:53 68.0461:25 68.45377:28 69.02975:26 70.0638:42 70.06693:68 71.06864:43 72.08173:20 72.50971:20 75.21881:25 76.55552:38 77.84962:33 79.05344:33 79.05958:32 80.05251:30 81.07195:40 82.06228:75 84.08179:18 84.08839:45 85.08432:87 86.05342:21 86.09943:42 87.33754:17 91.04838:25 92.04657:27 92.06172:18 93.06002:21 93.07023:64 94.05145:31 94.0654:401 95.04576:27 95.07558:65 95.09…
00072_Cephaeline; PlaSMA ID-2542	Annotation level-1; PlaSMA ID-2542; ID title-Cephaeline; Max plant tissue-Standard only	72	Cephaeline; PlaSMA ID-2542	2.98	467.29	[M+H]+	C28H38N2O4		DTGZHCFJNDAHEN-UHFFFAOYNA-N	OC=1C=C2C(=CC1OC)C(NCC2)CC3CC4C5=CC(OC)=C(OC)C=C5CCN4CC3CC	rgb(128, 128, 128)	95.07726:30 104.0587:24 105.0733:20 131.05479:27 135.0834:22 150.0654:20 151.08231:23 158.11011:32 160.0853:62 160.46069:20 163.0667:23 163.08031:31 165.07471:26 165.0932:17 165.1011:27 176.076:21 176.0923:42 177.07941:36 177.0961:23 179.0808:21 179.1003:48 180.10181:27 183.0825:21 185.90179:33 189.09441:35 190.08:57 190.0858:23 191.0916:17 191.1057:20 192.1053:73 199.1474:24 202.1095:28 203.1044…
00073_Emetine; PlaSMA ID-2605	Annotation level-1; PlaSMA ID-2605; ID title-Emetine; Max plant tissue-Standard only	73	Emetine; PlaSMA ID-2605	3.41	481.306	[M+H]+	C29H40N2O4		AUVVAXYIELKVAI-UHFFFAOYNA-N	O(C=1C=C2C(=CC1OC)C(NCC2)CC3CC4C5=CC(OC)=C(OC)C=C5CCN4CC3CC)C	rgb(128, 128, 128)	68.05539:39 86.10171:21 115.0547:21 132.7941:25 141.065:77 143.0477:17 144.6732:18 147.06731:24 151.05969:33 159.0726:20 160.07809:19 160.08569:24 161.09019:34 162.0907:29 164.07381:41 164.0934:25 165.0889:53 165.09779:21 174.086:24 177.084:147 177.0938:115 178.08771:18 178.09531:36 179.0992:27 179.1058:69 186.09531:18 189.09641:79 189.286:26 190.0793:17 191.0959:66 191.1068:101 191.1162:24 192.1…
00074_(-)-Eburnamonine; PlaSMA ID-1511	Annotation level-1; PlaSMA ID-1511; ID title-(-)-Eburnamonine; Max plant tissue-Standard only	74	(-)-Eburnamonine; PlaSMA ID-1511	4.65	295.18	[M+H]+	C19H22N2O		WYJAPUKIYAZSEM-UHFFFAOYNA-N	O=C1N2C=3C=CC=CC3C4=C2C5N(CC4)CCCC5(C1)CC	rgb(128, 128, 128)	53.02247:17 65.03653:24 67.04176:22 69.03519:27 69.06847:38 70.06339:134 70.06826:177 72.07764:27 77.03727:23 79.05692:20 80.05338:19 81.03652:29 81.04177:18 81.05859:25 81.07256:17 82.06421:21 82.06821:33 83.0461:18 83.07022:104 83.08078:18 84.07207:40 84.0816:608 85.08228:20 91.05524:56 92.05772:17 94.05987:21 95.08553:134 97.0817:27 97.3865:21 98.09108:45 98.09895:35 98.20399:17 98.72943:23 10…
00075_14,15-Dehydro-16-epi-vincamine; PlaSMA ID-1944	Annotation level-1; PlaSMA ID-1944; ID title-14,15-Dehydro-16-epi-vincamine; Max plant tissue-Standard only	75	14,15-Dehydro-16-epi-vincamine; PlaSMA ID-1944	4.26	353.186	[M+H]+	C21H24N2O3		BQGJXFQCMYJENQ-UHFFFAOYNA-N	O=C(OC)C1(O)N2C=3C=CC=CC3C4=C2C5N(CC=CC5(CC)C1)CC4	rgb(128, 128, 128)	57.05041:20 67.04392:25 67.05667:18 69.07159:76 70.06301:51 70.06808:69 77.03923:42 78.35932:19 79.0554:71 80.04558:37 80.05167:100 81.04373:32 83.04781:28 84.32619:52 91.05422:104 92.04957:22 93.06339:34 93.06927:39 94.06346:166 94.06983:25 94.48907:24 95.08782:25 96.08051:228 97.08926:26 103.0515:19 105.069:48 106.0691:29 107.0722:50 108.0447:67 108.0792:85 108.0852:135 109.0717:49 110.0959:84 …
00076_Vincamine; PlaSMA ID-1986	Annotation level-1; PlaSMA ID-1986; ID title-Vincamine; Max plant tissue-Standard only	76	Vincamine; PlaSMA ID-1986	4.5	355.202	[M+H]+	C21H26N2O3		RXPRRQLKFXBCSJ-UHFFFAOYNA-N	O=C(OC)C1(O)N2C=3C=CC=CC3C4=C2C5N(CC4)CCCC5(CC)C1	rgb(128, 128, 128)	55.99641:20 58.06557:62 69.07362:30 69.24485:24 70.06558:44 73.2776:25 79.05276:25 83.04839:46 84.88482:21 85.08985:35 93.0715:68 95.09468:19 96.07844:56 105.0664:21 105.0767:53 106.0697:19 107.0685:30 108.0829:47 110.0935:164 110.1003:45 110.3954:17 111.1028:61 112.1129:90 112.1186:21 116.0471:31 117.0718:115 118.0639:23 118.0705:19 119.0894:21 120.0435:45 121.0643:17 121.072:42 121.6453:27 121.…
00077_(+)-Tubocurarine chloride; PlaSMA ID-3025	Annotation level-1; PlaSMA ID-3025; ID title-(+)-Tubocurarine chloride; Max plant tissue-Standard only	77	(+)-Tubocurarine chloride; PlaSMA ID-3025	3.41	609.296	[M+H]+	C37H40N2O6		JFJZZMVDLULRGK-UHFFFAOYNA-O	OC1=CC=C2C=C1OC=3C=C4C(=CC3OC)CCN(C)C4CC5=CC=C(OC=6C(O)=C(OC)C=C7C6C(C2)[N+](C)(C)CC7)C=C5	rgb(128, 128, 128)	174.08949:17 177.0685:21 192.1035:21 193.1088:19 221.0582:22 245.2966:18 252.0759:19 266.0979:18 266.12241:25 268.061:21 279.11459:23 282.10101:21 282.1109:25 284.1174:18 284.13229:52 285.1088:30 285.12619:19 288.81421:20 289.09109:24 294.11041:17 295.12329:72 296.12009:18 297.1261:60 297.13589:43 297.14771:41 298.1355:27 299.13531:20 307.1228:22 308.11911:22 310.15689:23 311.08569:20 323.1557:28…
00078_Yohimbic Acid; PlaSMA ID-1880	Annotation level-1; PlaSMA ID-1880; ID title-Yohimbic Acid; Max plant tissue-Standard only	78	Yohimbic Acid; PlaSMA ID-1880	3.82	341.186	[M+H]+	C20H24N2O3		AADVZSXPNRLYLV-UHFFFAOYNA-N	O=C(O)C1C(O)CCC2CN3CCC=4C=5C=CC=CC5NC4C3CC12	rgb(128, 128, 128)	71.67553:17 78.04481:32 80.00648:17 89.03864:24 94.06745:56 94.34805:17 96.04498:17 105.0732:60 105.0775:27 106.0355:33 106.0471:24 106.0635:17 106.0712:18 107.0683:18 108.0882:18 108.5969:24 110.0967:22 115.0515:119 115.0594:109 115.993:26 117.0593:114 117.0714:588 118.0709:28 119.0463:41 119.087:44 121.0702:18 122.0933:41 123.1034:19 126.957:21 127.005:20 127.0434:46 127.0506:131 127.0564:122 1…
00079_Hirsuteine; PlaSMA ID-2049	Annotation level-1; PlaSMA ID-2049; ID title-Hirsuteine; Max plant tissue-Standard only	79	Hirsuteine; PlaSMA ID-2049	5.68	367.202	[M+H]+	C22H26N2O3		TZUGIFAYWNNSAO-UHFFFAOYNA-N	O=C(OC)C(=COC)C1CC2C=3NC=4C=CC=CC4C3CCN2CC1C=C	rgb(128, 128, 128)	56.0149:30 60.04952:18 60.29349:20 68.0405:25 68.04501:91 68.0516:162 68.27209:22 69.03311:37 75.01917:31 75.02505:31 75.03515:23 75.04436:175 77.03383:82 79.05378:41 80.04932:17 81.07227:31 82.0623:217 82.83:20 84.68024:22 85.02657:18 91.03602:42 91.04285:46 91.04904:76 91.05335:69 92.0374:51 92.34415:17 93.20596:34 94.0648:56 95.04488:159 95.0489:299 95.05649:76 96.04971:23 96.05769:20 96.08398…
00080_Hirsutine; PlaSMA ID-2071	Annotation level-1; PlaSMA ID-2071; ID title-Hirsutine; Max plant tissue-Standard only	80	Hirsutine; PlaSMA ID-2071	5.85	369.217	[M+H]+	C22H28N2O3		NMLUOJBSAYAYEM-UHFFFAOYNA-N	O=C(OC)C(=COC)C1CC2C=3NC=4C=CC=CC4C3CCN2CC1CC	rgb(128, 128, 128)	56.05301:63 60.04199:55 75.03769:27 75.04365:163 77.79713:18 79.0489:28 81.07274:26 84.05669:17 84.07853:287 84.08584:74 84.37505:24 85.0229:48 91.05511:48 92.06757:21 92.54125:19 93.06461:24 93.07562:31 94.44077:17 95.04287:32 95.04953:150 96.07765:45 103.0436:36 103.0559:17 104.0138:34 104.0556:25 105.0701:20 106.0672:23 107.051:20 107.0866:21 108.0607:115 108.08:267 109.0278:25 109.061:27 109.…
00081_Mitragynine; PlaSMA ID-2187	Annotation level-1; PlaSMA ID-2187; ID title-Mitragynine; Max plant tissue-Standard only	81	Mitragynine; PlaSMA ID-2187	5.54	399.228	[M+H]+	C23H30N2O4		LELBFTMXCIIKKX-UHFFFAOYNA-N	O=C(OC)C(=COC)C1CC2C=3NC=4C=CC=C(OC)C4C3CCN2CC1CC	rgb(128, 128, 128)	63.56606:19 67.05162:20 72.04368:30 75.03393:23 75.04228:182 75.04665:72 75.06151:18 76.05212:27 81.05199:19 84.07173:18 84.0798:105 84.08616:31 85.03325:38 91.05809:27 93.06911:43 95.04927:112 95.05883:18 96.05573:26 98.36551:20 99.0412:18 99.08295:23 100.0745:30 105.0592:22 106.0779:32 108.0764:62 109.0606:20 110.0522:31 110.076:23 110.0967:2066 111.0423:110 111.0985:148 112.1087:28 114.0943:17…
00082_Reserpic acid; PlaSMA ID-2195	Annotation level-1; PlaSMA ID-2195; ID title-Reserpic acid; Max plant tissue-Standard only	82	Reserpic acid; PlaSMA ID-2195	3.89	401.207	[M+H]+	C22H28N2O5		JVHNBFFHWQQPLL-UHFFFAOYNA-N	O=C(O)C1C(OC)C(O)CC2CN3CCC=4C=5C=CC(OC)=CC5NC4C3CC12	rgb(128, 128, 128)	70.06923:25 79.05499:21 80.05164:18 85.06584:28 90.97185:17 91.02903:27 91.05258:83 93.05826:20 93.07013:37 94.06563:22 97.06359:27 105.073:28 106.0656:22 107.034:18 107.0642:22 107.0757:99 108.0193:19 108.0821:45 109.0659:26 110.0963:17 115.0523:83 117.0517:37 117.0605:20 117.0716:40 118.0575:37 118.0634:23 118.0779:24 120.0823:68 123.0714:25 123.0781:22 123.0874:23 124.0449:18 124.0788:20 126.2…
00083_7-Hydroxymitragynine; PlaSMA ID-2263	Annotation level-1; PlaSMA ID-2263; ID title-7-Hydroxymitragynine; Max plant tissue-Standard only	83	7-Hydroxymitragynine; PlaSMA ID-2263	4.26	415.223	[M+H]+	C23H30N2O5		RYENLSMHLCNXJT-UHFFFAOYNA-N	O=C(OC)C(=COC)C1CC2C3=NC=4C=CC=C(OC)C4C3(O)CCN2CC1CC	rgb(128, 128, 128)	56.05183:44 59.05204:18 75.04429:18 79.5152:17 79.90983:20 84.08281:22 106.0684:18 108.0862:30 109.0624:27 110.0975:400 110.1483:17 111.1031:25 115.0423:46 116.0495:48 117.0586:44 119.0556:17 121.06:27 122.0955:19 124.0933:30 124.1147:61 126.0533:32 129.0519:64 129.0594:98 130.06509:54 131.0675:18 132.0464:32 132.4351:19 133.0433:19 133.05251:20 134.0556:65 134.06329:62 135.10001:20 136.11:19 138…
00084_Conessine; PlaSMA ID-1999	Annotation level-1; PlaSMA ID-1999; ID title-Conessine; Max plant tissue-Standard only	84	Conessine; PlaSMA ID-1999	3.35	357.326	[M+H]+	C24H40N2		GPLGAQQQNWMVMM-UHFFFAOYNA-N	C1=C2CC(N(C)C)CCC2(C)C3CCC45CN(C)C(C)C5CCC4C3C1	rgb(128, 128, 128)	81.06757:23 134.0997:20 146.106:25 147.11659:37 157.1086:19 159.11099:17 159.1194:33 161.1403:25 162.13161:17 162.1395:34 173.1313:25 187.14861:18 188.1534:21 188.23621:18 269.22061:17 270.22821:23 312.26111:92 312.27811:72 313.26971:53 343.19781:33 356.31921:31 357.32581:1471
00085_Cinchonine; PlaSMA ID-1510	Annotation level-1; PlaSMA ID-1510; ID title-Cinchonine; Max plant tissue-Standard only	85	Cinchonine; PlaSMA ID-1510	3.09	295.18	[M+H]+	C19H22N2O		KMPWYEUPVWOPIM-UHFFFAOYNA-N	OC(C=1C=CN=C2C=CC=CC21)C3N4CCC(C3)C(C=C)C4	rgb(128, 128, 128)	80.0496:20 81.07608:39 84.52991:17 93.48596:21 96.08214:24 106.0702:21 109.0857:20 119.0721:20 120.0888:18 129.0576:17 130.05769:68 130.0661:90 132.08211:24 135.0963:71 136.11349:17 142.0585:52 142.07001:50 143.08459:29 144.0788:22 154.0621:22 154.0695:36 156.08389:96 156.66969:17 162.0831:20 166.11749:27 166.12621:54 167.0735:71 168.0744:56 168.08971:60 169.08141:50 170.0686:27 172.0824:43 178.0…
00086_Cinchonidine; PlaSMA ID-1512	Annotation level-1; PlaSMA ID-1512; ID title-Cinchonidine; Max plant tissue-Standard only	86	Cinchonidine; PlaSMA ID-1512	3.15	295.18	[M+H]+	C19H22N2O		KMPWYEUPVWOPIM-UHFFFAOYNA-N	OC(C=1C=CN=C2C=CC=CC21)C3N4CCC(C3)C(C=C)C4	rgb(128, 128, 128)	51.49275:27 79.06018:24 81.07053:71 81.07536:75 82.07188:25 82.0768:22 83.08184:24 91.05659:25 95.07132:23 95.07693:44 95.0826:29 105.0683:21 107.0643:17 110.0967:115 112.8681:27 115.0548:22 117.0706:26 122.1:46 124.0654:19 124.11:55 127.0564:30 128.0518:28 129.0623:54 130.0657:261 130.0719:72 132.0787:47 132.11031:21 134.0981:48 135.1124:40 136.1165:30 142.06419:133 142.0696:52 143.073:139 144.0…
00087_Quinidine; PlaSMA ID-1753	Annotation level-1; PlaSMA ID-1753; ID title-Quinidine; Max plant tissue-Standard only	87	Quinidine; PlaSMA ID-1753	3.31	325.191	[M+H]+	C20H24N2O2		LOUPRKONTZGTKE-UHFFFAOYNA-N	OC(C=1C=CN=C2C=CC(OC)=CC21)C3N4CCC(C3)C(C=C)C4	rgb(128, 128, 128)	53.04023:22 55.43606:22 79.05728:41 81.06864:30 81.07326:49 93.70005:20 95.07173:19 96.08354:23 105.0743:17 108.0842:41 110.0938:40 110.1051:25 117.0532:17 118.0732:18 122.0959:73 124.1086:18 131.0256:28 133.0869:25 134.0997:47 135.1059:50 136.10381:20 138.1286:82 143.077:26 144.0786:21 145.05521:24 152.0985:30 154.0705:21 158.05611:45 159.05029:35 159.0607:29 160.0591:46 160.07159:127 160.07899:…
00088_Germbudine; PlaSMA ID-3197	Annotation level-1; PlaSMA ID-3197; ID title-Germbudine; Max plant tissue-Standard only	88	Germbudine; PlaSMA ID-3197	4.65	710.411	[M+H]+	C37H59NO12		LWSPRPDSPCBAKK-UHFFFAOYNA-N	O=C(OC1C(O)C2C(CN3CC(C)CCC3C2(O)C)C4CC56OC7(O)C(OC(=O)C(O)(C)C(O)C)CCC6(C)C7CC(O)C5C14O)C(C)CC	rgb(128, 128, 128)	89.06099:23 98.75224:19 105.0326:23 112.1118:25 126.0884:22 136.1114:21 154.11121:35 154.12621:313 155.12801:60 172.1302:22 202.1203:26 207.10271:30 210.1548:48 211.8476:18 218.886:29 227.125:24 231.79131:17 240.13319:23 245.7691:23 260.17249:41 264.15659:25 265.8566:21 267.1196:20 273.5687:24 279.13791:68 279.15179:18 281.14001:28 290.38831:24 291.13931:18 294.97159:18 297.14459:40 310.88379:20 …
00089_Germinaline; PlaSMA ID-3267	Annotation level-1; PlaSMA ID-3267; ID title-Germinaline; Max plant tissue-Standard only	89	Germinaline; PlaSMA ID-3267	5.04	752.422	[M+H]+	C39H61NO13		CPINTEKYWNYXNP-UHFFFAOYNA-N	O=C(OC(C)C(O)(C(=O)OC1CCC2(C)C3CC(O)C4C5(O)C(OC(=O)C(C)CC)C(O)C6C(CN7CC(C)CCC7C6(O)C)C5CC42OC13O)C)C	rgb(128, 128, 128)	63.94351:27 98.09578:24 99.04277:27 112.7992:23 117.0576:20 128.10831:27 154.1216:61 154.1367:20 177.1485:21 287.69269:26 352.22351:27 377.37289:30 378.5025:38 392.23569:17 409.01361:33 420.2482:40 420.26279:20 438.25311:38 438.28159:29 439.2756:23 444.93121:36 456.23929:40 456.27319:120 457.2659:18 457.28439:25 462.0481:26 468.54559:20 474.2861:19 508.3403:20 522.27667:18 522.42743:20 554.33972:…
00090_Anabasamine; PlaSMA ID-1085	Annotation level-1; PlaSMA ID-1085; ID title-Anabasamine; Max plant tissue-Standard only	90	Anabasamine; PlaSMA ID-1085	2.37	254.165	[M+H]+	C16H19N3		TZRDBHMKTWECOV-UHFFFAOYNA-N	N1=CC=CC(=C1)C=2N=CC(=CC2)C3N(C)CCCC3	rgb(128, 128, 128)	52.59699:18 70.07003:27 84.0859:48 85.07634:24 92.04914:18 96.06498:21 96.08075:93 98.11651:20 103.059:21 115.0586:41 116.0402:20 116.0497:21 116.0627:29 117.057:18 123.0989:20 124.9763:30 128.0446:17 129.1539:20 130.06979:103 134.0975:25 135.0995:21 140.0506:18 142.0596:49 142.0667:81 143.0578:18 143.0692:65 144.069:21 144.08141:125 144.3719:17 145.0704:27 145.0865:39 148.1167:20 155.0741:19 156…
00091_Papaverine; PlaSMA ID-1865	Annotation level-1; PlaSMA ID-1865; ID title-Papaverine; Max plant tissue-Standard only	91	Papaverine; PlaSMA ID-1865	4.49	340.154	[M+H]+	C20H21NO4		XQYZDYMELSJDRZ-UHFFFAOYSA-N	N=1C=CC=2C=C(OC)C(OC)=CC2C1CC3=CC=C(OC)C(OC)=C3	rgb(128, 128, 128)	71.90758:24 75.03912:25 91.05379:52 95.03867:17 95.04929:110 95.0556:17 97.71223:19 101.6074:27 103.0593:37 106.9176:27 107.0491:23 107.0538:17 107.3663:20 108.0572:78 114.0509:18 115.0414:17 115.0531:126 116.0509:24 117.0703:25 117.0762:21 119.0726:25 121.0601:34 121.0685:57 122.036:21 122.0668:26 123.032:82 123.0423:355 123.0508:164 124.0498:69 124.0583:25 127.0368:21 128.0349:25 128.047:134 12…
00092_Laudanosine; PlaSMA ID-2002	Annotation level-1; PlaSMA ID-2002; ID title-Laudanosine; Max plant tissue-Standard only	92	Laudanosine; PlaSMA ID-2002	4.26	358.201	[M+H]+	C21H27NO4		KGPAYJZAMGEDIQ-UHFFFAOYNA-N	O(C1=CC=C(C=C1OC)CC2C3=CC(OC)=C(OC)C=C3CCN2C)C	rgb(128, 128, 128)	75.5304:20 79.05361:52 91.04743:27 91.0522:47 91.05758:38 92.06171:33 94.56095:19 95.05298:34 95.93555:29 98.02866:20 103.0465:21 103.0658:21 105.0293:21 105.0343:25 105.0628:20 105.0727:41 106.0467:21 106.0784:27 107.0478:107 107.0585:17 108.0503:42 108.058:83 112.2303:17 115.0549:28 116.0621:73 117.0569:19 117.0633:28 117.0745:27 118.9635:18 119.0305:31 121.0583:44 121.0642:60 122.0617:28 122.0…
00093_Hetisine; PlaSMA ID-1787	Annotation level-1; PlaSMA ID-1787; ID title-Hetisine; Max plant tissue-Standard only	93	Hetisine; PlaSMA ID-1787	3.07	330.206	[M+H]+	C20H27NO3		PIWJSAMCEMZIDO-UHFFFAOYNA-N	OC1CC2(C)CN3C4CC56CC(=C)C7C(O)C6C3C(C1)(C5C7O)C42	rgb(128, 128, 128)	67.05592:22 70.57107:24 79.05325:21 84.04025:22 91.05336:45 93.06477:20 93.06975:17 94.06082:43 94.0647:72 95.04789:49 95.08926:25 95.53297:18 97.03157:20 105.0684:19 106.0711:17 107.0911:60 114.5261:21 115.0543:20 116.0573:24 117.0715:35 118.0616:44 119.0905:20 120.0726:26 120.0826:104 121.077:31 121.0866:24 122.0518:20 127.5884:19 128.06149:20 129.0704:54 129.0743:20 130.06:18 130.0752:21 131.0…
00094_Guan-fu base Y; PlaSMA ID-2138	Annotation level-1; PlaSMA ID-2138; ID title-Guan-fu base Y; Max plant tissue-Standard only	94	Guan-fu base Y; PlaSMA ID-2138	3.03	388.212	[M+H]+	C22H29NO5		XGTNTUKODZZCGL-UHFFFAOYNA-N	O=C(OC1CC2(C)CN3C4CC56CC(=C)C7C(O)C6C(C1)(C3C5(O)C7O)C42)C	rgb(128, 128, 128)	57.02919:20 57.03294:24 69.0301:21 79.05467:52 84.04556:22 91.03821:36 91.06326:19 93.07156:196 93.53223:19 95.07165:21 96.07106:24 98.86169:18 101.3454:19 105.0716:576 106.0749:69 106.3307:17 107.0726:21 107.0857:39 107.0905:80 111.2685:57 117.0682:41 119.0639:25 119.0832:48 120.0894:25 121.061:54 121.101:165 121.1094:18 122.0947:20 122.1056:62 122.1101:29 126.0906:17 128.1646:20 129.06039:20 12…
00095_Pseudocopsinine; PlaSMA ID-1861	Annotation level-1; PlaSMA ID-1861; ID title-Pseudocopsinine; Max plant tissue-Standard only	95	Pseudocopsinine; PlaSMA ID-1861	4.24	339.207	[M+H]+	C21H26N2O2		CZLWGXKWXLVFJU-UHFFFAOYNA-N	O=C(OC)C1CC23CCCN4CCC5(C=6C=CC=CC6NC15C2C)C43	rgb(128, 128, 128)	95.0842:18 96.08184:782 96.09504:17 97.08063:89 97.08755:78 98.00323:44 106.0655:27 122.0962:24 129.07179:23 130.0634:20 138.1273:20 144.0807:41 147.0768:20 151.0737:26 154.0659:73 162.1272:18 169.067:29 169.0771:21 170.06371:74 183.099:21 184.06731:36 186.1469:17 195.08791:17 202.086:21 205.0851:24 216.10229:77 217.1035:29 221.118:44 221.13251:30 223.1097:18 225.1385:17 234.0928:17 234.989:19 23…
00096_Subsessiline; PlaSMA ID-3209	Annotation level-1; PlaSMA ID-3209; ID title-Subsessiline; Max plant tissue-Standard only	96	Subsessiline; PlaSMA ID-3209	5.79	717.365	[M+H]+	C43H48N4O6		RZBFPDQKWUWUCK-UHFFFAOYNA-N	O=C(OC)C1=C2NC=3C=CC=CC3C24CCN5C6OC78N9C=%10C(OC)=CC=CC%10C%118CCN%12CCC%13OCCC%13(CC7CC6(C9)C%14OCCC%14(C1)C54)C%12%11	rgb(128, 128, 128)	55.57854:29 110.0623:17 144.0872:43 148.85941:17 148.8793:17 168.0804:22 168.09309:23 176.1086:42 190.0961:17 196.0744:61 197.0726:24 200.1019:20 215.0955:25 217.10139:27 225.98441:38 227.2253:47 228.0988:395 228.11411:24 228.1246:33 229.0677:24 229.0833:32 229.1049:17 229.12131:21 229.1328:28 230.243:17 243.1011:33 243.9136:41 245.0864:37 245.09641:34 245.13029:674 245.14481:67 246.11819:54 246.…
00097_Kopsinine; PlaSMA ID-1860	Annotation level-1; PlaSMA ID-1860; ID title-Kopsinine; Max plant tissue-Standard only	97	Kopsinine; PlaSMA ID-1860	3.92	339.207	[M+H]+	C21H26N2O2		IYLRRIUNGGQRTN-UHFFFAOYNA-N	O=C(OC)C1CC23CCCN4CCC5(C=6C=CC=CC6NC15CC2)C43	rgb(128, 128, 128)	67.05035:25 70.0648:23 77.04037:23 87.04442:38 87.05065:18 91.05062:43 96.06898:21 96.08005:224 97.08514:43 97.09102:39 108.0801:26 110.0736:27 110.0917:169 115.0546:46 118.0534:29 118.0645:22 119.0807:19 120.0787:19 120.084:31 122.0893:54 123.1018:20 124.0745:20 124.1196:33 129.0683:50 130.0643:46 131.07001:20 131.0853:22 136.1105:17 136.11681:25 142.0612:21 144.08051:93 145.10159:22 148.0739:27…
00098_Kopsinoline; PlaSMA ID-1983	Annotation level-1; PlaSMA ID-1983; ID title-Kopsinoline; Max plant tissue-Standard only	98	Kopsinoline; PlaSMA ID-1983	4.18	355.202	[M+H]+	C21H26N2O3		KWXHCCIXBUPHTG-UHFFFAOYNA-N	O=C(OC)C1CC23CCCN4(=O)CCC5(C=6C=CC=CC6NC15CC2)C34	rgb(128, 128, 128)	56.05075:20 64.15833:23 65.06002:17 69.11017:19 70.05583:33 70.06674:29 70.49576:20 72.77912:34 81.06541:17 81.07219:25 82.06055:20 85.08993:22 86.09274:18 95.06612:26 95.08384:23 96.07771:30 98.10458:20 98.56947:27 106.0654:21 108.0762:28 108.0805:80 109.0741:39 109.0894:991 110.0841:20 110.0926:32 110.1001:37 111.0936:34 121.0875:55 121.7505:18 122.0946:92 122.6173:20 122.9333:41 123.1057:18 12…
00099_11,12-Methylenedioxykopsinaline; PlaSMA ID-2186	Annotation level-1; PlaSMA ID-2186; ID title-11,12-Methylenedioxykopsinaline; Max plant tissue-Standard only	99	11,12-Methylenedioxykopsinaline; PlaSMA ID-2186	3.61	399.191	[M+H]+	C22H26N2O5		JVIKUDVTJCANPX-UHFFFAOYNA-N	O=C(OC)C1(O)CC23CCCN4CCC5(C6=CC=C7OCOC7=C6NC15CC2)C43	rgb(128, 128, 128)	95.04823:19 103.0387:76 109.0876:23 109.0919:51 110.0957:24 115.7531:25 116.0682:23 119.0879:31 120.0838:60 122.0906:81 124.1181:35 132.20329:20 132.9303:20 134.1012:42 135.0771:24 136.073:51 136.10831:23 136.1152:34 138.0786:65 138.088:59 138.09509:17 138.1143:17 140.0739:17 146.0556:41 148.0627:21 150.0537:18 152.06551:17 158.05321:20 158.06219:56 158.1039:33 160.0712:30 160.1105:31 161.0463:39…
00100_Remerine; PlaSMA ID-1342	Annotation level-1; PlaSMA ID-1342; ID title-Remerine; Max plant tissue-Standard only	100	Remerine; PlaSMA ID-1342	4.89	280.133	[M+H]+	C18H17NO2		JCTYWRARKVGOBK-UHFFFAOYNA-N	O1C=2C=C3C4=C(C2OC1)C5=CC=CC=C5CC4N(C)CC3	rgb(128, 128, 128)	103.4679:24 109.39:21 121.6715:17 141.06821:21 151.054:24 152.0632:22 153.0687:17 162.1234:21 162.50661:21 165.0479:27 165.0564:20 165.06911:350 166.0748:86 166.9998:17 169.7614:17 169.84641:17 174.9756:17 176.0545:20 176.0681:17 177.0688:17 178.0647:130 178.0773:1197 179.0858:664 180.0909:51 181.0833:26 181.2048:18 182.6947:20 186.12331:19 186.5009:31 189.0712:932 189.11951:19 189.14999:26 190.0…
00101_Boldine; PlaSMA ID-1768	Annotation level-1; PlaSMA ID-1768; ID title-Boldine; Max plant tissue-Standard only	101	Boldine; PlaSMA ID-1768	3.35	328.154	[M+H]+	C19H21NO4		LZJRNLRASBVRRX-UHFFFAOYNA-N	OC1=CC2=C(C=C1OC)C3=C(OC)C(O)=CC4=C3C(N(C)CC4)C2	rgb(128, 128, 128)	68.52914:27 120.5458:24 137.0743:27 138.4409:18 139.39639:19 139.4882:20 141.063:18 141.073:28 151.0459:30 151.05499:22 152.0618:20 155.07829:30 155.0883:22 155.3593:18 165.007:19 165.0334:21 165.0665:95 165.07561:140 165.83881:20 166.07651:182 166.08859:71 167.08141:68 167.09019:25 168.05881:18 169.09129:37 170.17709:18 173.5984:41 176.063:300 177.0545:52 177.06979:1680 177.783:39 177.8425:18 17…
00102_Nantenine; PlaSMA ID-1864	Annotation level-1; PlaSMA ID-1864; ID title-Nantenine; Max plant tissue-Standard only	102	Nantenine; PlaSMA ID-1864	4.89	340.154	[M+H]+	C20H21NO4		WSVWKHTVFGTTKJ-UHFFFAOYNA-N	O(C=1C=C2C3=C(C1OC)C4=CC=5OCOC5C=C4CC3N(C)CC2)C	rgb(128, 128, 128)	71.12127:25 89.39894:19 104.494:21 108.5448:26 127.8209:21 129.8102:21 133.92261:43 147.5302:26 152.7428:21 153.06:52 157.0952:19 157.11099:30 157.1395:18 158.411:43 160.38229:17 164.77859:25 165.0641:219 165.0732:401 165.8241:24 166.0769:137 167.0768:46 167.2675:36 167.84711:20 168.185:38 171.1106:32 171.26849:24 172.8228:27 173.85429:22 176.07539:29 177.06281:131 177.0714:253 178.0536:25 178.06…
00103_Isocorydine; PlaSMA ID-1885	Annotation level-1; PlaSMA ID-1885; ID title-Isocorydine; Max plant tissue-Standard only	103	Isocorydine; PlaSMA ID-1885	3.92	342.17	[M+H]+	C20H23NO4		QELDJEKNFOQJOY-UHFFFAOYNA-N	OC=1C(OC)=CC=C2C1C=3C(OC)=C(OC)C=C4C3C(N(C)CC4)C2	rgb(128, 128, 128)	88.33728:18 90.92408:17 91.22727:18 115.059:25 123.5114:20 136.0314:27 138.18829:25 140.0553:24 147.0556:17 152.0475:20 152.0627:24 153.0649:24 153.13699:21 154.0811:18 160.97099:23 161.8078:17 162.8549:21 164.0591:20 164.3607:19 165.0717:383 165.1116:19 166.0787:63 166.0907:21 167.06039:25 167.08771:46 167.79379:32 168.0531:18 168.8597:37 169.064:18 170.3:20 173.5466:17 175.10831:21 177.06779:64…
00104_Calycanthine; PlaSMA ID-1908	Annotation level-1; PlaSMA ID-1908; ID title-Calycanthine; Max plant tissue-Standard only	104	Calycanthine; PlaSMA ID-1908	2.57	347.223	[M+H]+	C22H26N4		XSYCDVWYEVUDKQ-UHFFFAOYNA-N	C=1C=CC2=C(C1)NC3N(C)CCC24C5NC=6C=CC=CC6C34CCN5C	rgb(128, 128, 128)	96.08434:30 120.0729:41 120.0815:25 130.0643:276 130.47749:20 131.0694:48 132.06239:45 132.0748:141 132.08521:225 133.0778:22 139.52831:29 140.04539:25 142.0575:37 144.0815:253 145.0878:17 156.0732:60 156.08279:30 158.0802:21 159.08501:40 160.0981:20 166.3817:31 167.05099:29 168.082:236 168.0927:21 170.0929:37 172.0898:19 172.0977:35 173.1008:215 173.1102:227 174.10339:38 174.1115:60 175.1236:61 …
00105_DL-Coniine; PlaSMA ID-80	Annotation level-1; PlaSMA ID-80; ID title-DL-Coniine; Max plant tissue-Standard only	105	DL-Coniine; PlaSMA ID-80	2.78	128.143	[M+H]+	C8H17N		NDNUANOUGZGEPO-UHFFFAOYNA-N	N1CCCCC1CCC	rgb(128, 128, 128)	55.05771:27 57.0694:20 69.06039:43 69.07154:568 70.07704:20 75.93192:26 83.08236:21 84.09319:29 86.09702:24 95.03161:25 101.7498:32 101.9377:19 111.1204:47 115.1441:21 127.7081:18 128.1086:40 128.1254:23 128.14391:9970 128.16789:22 128.17619:36
00106_Pilocarpine; PlaSMA ID-738	Annotation level-1; PlaSMA ID-738; ID title-Pilocarpine; Max plant tissue-Standard only	106	Pilocarpine; PlaSMA ID-738	2.4	209.128	[M+H]+	C11H16N2O2		QCHFTSOMWOSFHM-UHFFFAOYNA-N	O=C1OCC(CC2=CN=CN2C)C1CC	rgb(128, 128, 128)	55.04084:40 61.93811:21 67.05805:46 67.66839:17 68.04741:26 80.04883:77 81.04507:20 81.05616:32 83.05888:26 84.02034:32 84.80145:19 93.2086:21 93.80584:20 94.04963:33 94.06738:132 94.77116:20 95.06063:2352 95.3769:20 95.86426:34 96.06879:1707 96.15086:21 96.96782:18 97.07205:235 98.05818:20 99.8045:17 102.8821:17 103.0592:26 104.0237:34 105.0549:20 105.072:33 108.077:16 108.0846:83 109.0503:44 10…
00107_Piperine; PlaSMA ID-1395	Annotation level-1; PlaSMA ID-1395; ID title-Piperine; Max plant tissue-Standard only	107	Piperine; PlaSMA ID-1395	7.84	286.144	[M+H]+	C17H19NO3		MXXWOMGUGJBKIW-UHFFFAOYSA-N	O=C(C=CC=CC1=CC=C2OCOC2=C1)N3CCCCC3	rgb(128, 128, 128)	63.02459:30 67.05336:25 67.69585:22 69.00239:18 69.06683:163 69.07232:366 70.07174:58 77.00774:25 77.01868:28 77.03737:98 78.04154:21 79.01663:44 79.05589:139 80.06303:28 81.05317:17 81.06098:21 84.07475:96 84.08169:283 86.09348:81 86.09963:325 86.53477:24 87.10024:90 89.03539:24 89.0416:43 94.06821:46 96.05018:56 98.45436:20 101.0413:20 101.5666:17 103.0563:177 104.0595:20 105.0293:99 105.0393:2…
00108_Rinderine; PlaSMA ID-1551	Annotation level-1; PlaSMA ID-1551; ID title-Rinderine; Max plant tissue-Standard only	108	Rinderine; PlaSMA ID-1551	2.75	300.18	[M+H]+	C15H25NO5		SFVVQRJOGUKCEG-UHFFFAOYNA-N	O=C(OCC1=CCN2CCC(O)C12)C(O)(C(O)C)C(C)C	rgb(128, 128, 128)	67.05303:66 67.05907:21 68.05069:41 73.06293:30 78.04082:46 80.04276:22 80.05038:134 80.05602:45 80.36929:37 81.04039:21 81.05611:29 81.06609:20 82.05737:36 82.06445:266 83.07248:29 84.0482:21 85.06293:33 86.0543:25 86.06201:22 90.36059:17 91.05267:72 92.05224:48 93.06789:37 94.04235:22 94.06667:872 95.07398:415 96.08147:910 97.08445:84 97.09086:21 98.05695:19 103.058:52 106.0489:27 106.0631:18 1…
00109_Seneciphyllin; PlaSMA ID-1820	Annotation level-1; PlaSMA ID-1820; ID title-Seneciphyllin; Max plant tissue-Standard only	109	Seneciphyllin; PlaSMA ID-1820	3.45	334.165	[M+H]+	C18H23NO5		FCEVNJIUIMLVML-UHFFFAOYNA-N	O=C1OC2CCN3CC=C(COC(=O)C(O)(C(=C)CC1=CC)C)C32	rgb(128, 128, 128)	66.51044:21 67.05385:65 67.05724:20 68.05444:19 71.8569:17 77.03618:48 77.04507:45 78.03123:18 78.04424:36 79.04111:22 79.0515:49 79.05769:29 80.0517:54 80.05724:49 81.03476:18 81.06732:20 82.04825:21 82.06358:17 82.07092:36 84.04651:42 91.057:133 91.06381:45 91.59922:17 92.04445:24 93.05298:30 93.06527:62 93.0728:147 94.05516:18 94.06543:566 94.06979:284 95.06897:55 95.08499:70 95.08929:44 96.07…
00110_Ajmaline; PlaSMA ID-1764	Annotation level-1; PlaSMA ID-1764; ID title-Ajmaline; Max plant tissue-Standard only	110	Ajmaline; PlaSMA ID-1764	4.13	327.207	[M+H]+	C20H26N2O2		CJDRUOGAGYHKKD-UHFFFAOYNA-N	OC1N2C3CC(C1CC)C4C(O)C5(C=6C=CC=CC6N(C)C35)CC24	rgb(128, 128, 128)	72.08338:28 73.07568:26 77.03882:19 78.0377:30 79.05635:57 80.04845:18 80.05447:20 81.03523:63 81.05752:64 81.07249:56 82.07172:19 84.03529:17 84.04469:76 84.08224:19 84.09358:36 85.03145:24 91.05561:25 93.07351:95 94.06437:36 94.07029:19 95.08537:20 96.04945:21 96.08624:22 97.06221:18 97.10304:19 98.09823:43 105.0737:20 106.066:36 106.0734:24 107.0412:21 107.0714:23 107.0826:41 108.0798:61 109.0…
00111_Karakoline; PlaSMA ID-2096	Annotation level-1; PlaSMA ID-2096; ID title-Karakoline; Max plant tissue-Standard only	111	Karakoline; PlaSMA ID-2096	2.89	378.264	[M+H]+	C22H35NO4		HKQZUYOVMYOFIT-UHFFFAOYNA-N	OC1CCC2(C)CN(CC)C3C4CC2C13C5CC6C(O)C5C4(O)CC6OC	rgb(128, 128, 128)	58.05909:25 58.06698:197 61.03249:36 67.0524:27 71.05069:22 71.73367:24 72.0481:18 72.05457:20 72.07905:17 72.08376:23 79.05724:29 82.00949:17 82.06694:17 84.06813:17 84.07558:22 84.08316:22 85.34259:21 91.05773:72 93.06999:41 95.0941:20 97.0802:23 98.0854:26 98.09673:244 99.08619:17 100.0531:25 103.0398:20 105.0707:53 106.0717:22 107.0494:23 108.0849:20 110.1001:100 111.1047:54 112.1122:24 113.0…
00112_Isotalatizidine; PlaSMA ID-2216	Annotation level-1; PlaSMA ID-2216; ID title-Isotalatizidine; Max plant tissue-Standard only	112	Isotalatizidine; PlaSMA ID-2216	2.91	408.274	[M+H]+	C23H37NO5		RBSZCNOWHDHRFZ-UHFFFAOYNA-N	OC1CCC2(COC)CN(CC)C3C4CC2C13C5CC6C(O)C5C4(O)CC6OC	rgb(128, 128, 128)	56.05008:21 58.05391:24 58.06651:285 58.92325:33 59.06769:22 62.67153:18 63.22071:17 66.37584:18 71.0127:26 71.04167:29 71.05196:17 72.06542:30 72.08252:244 79.05624:20 80.05034:48 83.05:25 84.07742:31 84.0816:76 85.06658:26 91.05157:18 93.06959:37 94.07407:55 94.63499:40 98.09775:767 99.01864:22 99.10152:62 99.15012:18 100.2152:25 100.5492:21 102.0837:28 102.0977:97 103.0395:60 103.0443:46 105.0…
00113_Lycoctonine; PlaSMA ID-2544	Annotation level-1; PlaSMA ID-2544; ID title-Lycoctonine; Max plant tissue-Standard only	113	Lycoctonine; PlaSMA ID-2544	3.67	468.296	[M+H]+	C25H41NO7		YOTUXHIWBVZAJQ-UHFFFAOYNA-N	OCC12CN(CC)C3C4(O)C(OC)C1C3(C(OC)CC2)C5CC6C(OC)CC4(O)C5C6OC	rgb(128, 128, 128)	55.01905:20 56.04695:22 58.06841:128 60.05881:18 60.08306:85 65.03773:25 68.73892:25 71.03632:19 71.05212:43 72.07567:20 72.08166:19 75.03633:25 75.04409:246 75.05139:43 76.04768:25 76.05336:39 79.05231:51 79.33613:29 81.07377:19 82.06645:30 84.07876:99 84.08495:86 85.02296:28 85.03127:22 85.05429:25 85.06627:108 86.06106:91 87.04514:20 88.07463:37 91.05603:128 91.89922:22 91.91965:21 93.06895:22…
00114_Anthranoyllycoctonine; PlaSMA ID-2956	Annotation level-1; PlaSMA ID-2956; ID title-Anthranoyllycoctonine; Max plant tissue-Standard only	114	Anthranoyllycoctonine; PlaSMA ID-2956	5.5	587.333	[M+H]+	C32H46N2O8		NNDHDYDFEDRMGH-UHFFFAOYNA-N	O=C(OCC12CN(CC)C3C4(O)C(OC)C1C3(C(OC)CC2)C5CC6C(OC)CC4(O)C5C6OC)C=7C=CC=CC7N	rgb(128, 128, 128)	58.06441:22 59.05033:24 61.04482:23 72.08203:27 75.04194:43 75.04856:65 79.04984:18 84.0841:35 87.07152:17 87.57155:44 88.32826:39 92.04278:20 93.06844:20 95.05328:18 95.68053:33 99.0826:24 99.10529:35 102.0936:30 105.0715:25 108.0806:856 108.6591:18 109.064:30 109.0848:23 109.091:23 110.0999:30 111.04:22 114.0923:20 117.0612:48 120.0299:43 120.045:1235 121.0453:27 121.0533:77 121.0631:19 121.446…
00115_Hypaconitine; PlaSMA ID-3047	Annotation level-1; PlaSMA ID-3047; ID title-Hypaconitine; Max plant tissue-Standard only	115	Hypaconitine; PlaSMA ID-3047	5.97	616.312	[M+H]+	C33H45NO10		FIDOCHXHMJHKRW-UHFFFAOYNA-N	O=C(OC1C2C3CC1(O)C(OC)C(O)C2(OC(=O)C)C4C(OC)C5C6(COC)CN(C)C4C35C(OC)CC6)C=7C=CC=CC7	rgb(128, 128, 128)	58.05944:42 66.20383:36 69.77207:101 70.0674:21 72.55499:18 75.0434:29 84.08289:25 86.06131:25 88.06742:25 88.07192:37 91.05464:18 94.06828:62 105.0063:20 105.0352:705 106.0361:39 106.0435:22 107.0496:18 108.0842:18 109.0837:24 114.0877:29 117.0556:30 118.0775:30 125.0693:23 126.0972:34 128.7437:31 129.0658:41 129.0753:38 131.0882:49 134.09441:62 135.08681:25 137.0569:20 140.0984:29 140.1105:23 1…
00116_Mesaconitine; PlaSMA ID-3085	Annotation level-1; PlaSMA ID-3085; ID title-Mesaconitine; Max plant tissue-Standard only	116	Mesaconitine; PlaSMA ID-3085	5.61	632.307	[M+H]+	C33H45NO11		XUHJBXVYNBQQBD-UHFFFAOYNA-N	O=C(OC1C2C3CC1(O)C(OC)C(O)C2(OC(=O)C)C4C(OC)C5C6(COC)CN(C)C4C35C(OC)CC6O)C=7C=CC=CC7	rgb(128, 128, 128)	75.04579:58 85.02888:48 88.07988:44 91.04781:20 97.09012:43 103.2041:23 105.0063:25 105.0342:752 106.0349:61 108.4942:29 109.0638:40 109.0713:60 111.0677:42 111.0765:51 111.0823:87 115.0479:25 115.0766:17 121.0726:40 126.0861:21 128.0676:23 128.1129:55 129.0722:22 131.0616:44 134.5948:33 137.0576:82 137.0643:62 137.0822:21 138.08859:39 141.09419:18 143.08611:34 148.08521:18 150.0497:20 150.08971:…
00117_Aconitine; PlaSMA ID-3119	Annotation level-1; PlaSMA ID-3119; ID title-Aconitine; Max plant tissue-Standard only	117	Aconitine; PlaSMA ID-3119	5.97	646.322	[M+H]+	C34H47NO11		XFSBVAOIAHNAPC-UHFFFAOYNA-N	O=C(OC1C2C3CC1(O)C(OC)C(O)C2(OC(=O)C)C4C(OC)C5C6(COC)CN(CC)C4C35C(OC)CC6O)C=7C=CC=CC7	rgb(128, 128, 128)	58.06814:49 60.06051:18 73.0857:37 75.03448:23 99.86422:20 101.3112:41 105.0342:306 106.0315:28 106.0386:73 108.0587:29 108.1972:24 111.075:18 112.0765:19 115.4697:27 115.5471:26 117.0638:48 119.0644:19 133.1002:50 136.1106:21 137.05991:41 140.10361:39 142.1216:74 143.12959:26 149.104:22 151.06689:23 153.1106:44 159.1138:30 163.0746:20 167.0843:63 168.0948:35 169.0692:28 171.0827:17 173.12579:27 …
00118_Acetylaconitine; PlaSMA ID-3173	Annotation level-1; PlaSMA ID-3173; ID title-Acetylaconitine; Max plant tissue-Standard only	118	Acetylaconitine; PlaSMA ID-3173	6.17	688.333	[M+H]+	C36H49NO12		RIPYIJVYDYCPKW-UHFFFAOYNA-N	O=C(OC1C2C3CC1(O)C(OC)C(O)C2(OC(=O)C)C4C(OC)C5C6(COC)CN(CC)C4C35C(OC)CC6OC(=O)C)C=7C=CC=CC7	rgb(128, 128, 128)	50.32804:34 58.06467:63 93.8904:33 103.9847:26 105.0147:24 105.0309:137 105.0361:202 106.0273:17 106.0386:40 106.5441:17 106.9965:25 108.081:20 109.063:24 109.0852:18 111.0792:76 121.0728:21 122.0893:20 122.0972:17 129.0666:22 135.0833:18 135.55859:19 137.05969:72 141.08749:44 142.07249:36 143.06931:21 152.0974:39 152.1089:68 152.1147:17 153.0968:20 154.1227:17 155.0847:23 156.537:27 159.0766:21 …
00119_Petiline; PlaSMA ID-2253	Annotation level-1; PlaSMA ID-2253; ID title-Petiline; Max plant tissue-Standard only	119	Petiline; PlaSMA ID-2253	4.95	414.337	[M+H]+	C27H43NO2		QAGPPGDCPAPQLW-UHFFFAOYNA-N	O=C1CC2C3CCC(C(C4=NCC(C)CC4)C)C3(C)CCC2C5(C)CCC(O)CC15	rgb(128, 128, 128)	56.04988:26 67.05002:62 67.05779:43 69.06439:27 69.07332:19 70.0648:50 71.04281:17 71.08565:23 77.03742:25 79.02665:19 79.04855:24 79.05222:48 81.07:269 82.06807:18 83.08789:27 84.083:48 91.05474:117 93.05067:29 93.06188:38 93.07102:342 93.07793:61 94.06327:40 94.07311:47 95.05027:36 95.08076:135 95.08767:148 96.08266:45 96.08906:22 97.0513:20 97.06496:56 97.08862:31 97.10261:34 98.09567:1256 99.…
00120_Carboline metabolite (C26H28N2O10); PlaSMA ID-2777	Annotation level-2.2; PlaSMA ID-2777; ID title-OP_Root_Pos-1821; Max plant tissue-OP_Root_Pos	120	Carboline metabolite (C26H28N2O10); PlaSMA ID-2777	3.69	529.182	[M+H]+	C26H28N2O10		SDJXJLVNEMUOTE-UHFFFAOYNA-N	O=C(O)C1=COC(OC2OC(CO)C(O)C(O)C2O)C(C=C)C1CC3=NC=CC=4C=5C=C(O)C=CC5NC34	rgb(128, 128, 128)	124.0397:433 125.0438:36 130.06129:16 130.0685:20 142.93159:33 145.0554:16 146.0529:16 148.07179:153 148.0788:86 149.0817:34 158.05589:16 160.0545:20 171.09821:18 175.0845:18 176.0665:36 176.0755:34 176.96851:16 194.0741:44 194.08859:16 206.08971:18 209.08279:16 214.05721:18 243.09019:21 271.09698:32 271.1084:100 271.12051:34 272.11081:66 279.0878:35 289.74869:20 295.1304:16 299.09921:60 300.0940…
00121_Deoxypumiloside; PlaSMA ID-2665	Annotation level-2.2; PlaSMA ID-2665; ID title-OP_Root_Pos-1628; Max plant tissue-OP_Root_Pos	121	Deoxypumiloside; PlaSMA ID-2665	5.27	497.196	[M+H]+	C26H28N2O8		BNDDTTIRGZIQSE-UHFFFAOYNA-N	O=C1C2=COC(OC3OC(CO)C(O)C(O)C3O)C(C=C)C2CC4C5=NC=6C=CC=CC6C=C5CN14	rgb(128, 128, 128)	71.05133:17 97.02865:40 107.0504:16 113.2389:16 120.0518:17 121.0686:29 122.0553:24 142.05479:34 142.0648:289 142.0761:29 143.06841:63 143.07851:21 145.0571:26 149.0643:21 149.0701:16 149.49541:28 150.065:51 158.05811:32 163.87061:16 169.05299:17 169.07739:1340 170.0388:21 170.0811:201 170.94701:19 171.0836:34 171.09419:16 178.14059:24 181.0748:17 182.0845:43 183.0905:16 194.09641:19 195.104:16 2…
00122_Pumiloside; PlaSMA ID-2720	Annotation level-2.2; PlaSMA ID-2720; ID title-OP_Root_Pos-1716; Max plant tissue-OP_Root_Pos	122	Pumiloside; PlaSMA ID-2720	4.07	513.191	[M+H]+	C26H28N2O9		ODQBQUXGRYBRTP-UHFFFAOYNA-N	O=C1C=2C=CC=CC2NC3=C1CN4C(=O)C5=COC(OC6OC(CO)C(O)C(O)C6O)C(C=C)C5CC34	rgb(128, 128, 128)	91.05442:17 108.1222:20 120.049:52 121.0494:27 122.0761:34 124.0311:37 124.0439:19 131.0864:25 138.41479:16 146.06261:16 148.07761:16 149.0555:36 149.06419:24 149.07851:18 150.06441:18 158.02541:22 158.0636:721 159.0609:19 160.07401:16 163.0417:20 172.07581:17 175.0571:17 176.0609:62 176.0705:65 176.0779:34 182.0607:34 183.0741:16 184.0612:32 184.075:39 184.08321:32 185.0473:18 185.07291:1445 185…
00123_Carboline metabolite (C26H28N2O9); PlaSMA ID-2719	Annotation level-2.2; PlaSMA ID-2719; ID title-OP_Root_Pos-1715; Max plant tissue-OP_Root_Pos	123	Carboline metabolite (C26H28N2O9); PlaSMA ID-2719	5.07	513.19	[M+H]+	C26H28N2O9		QJMQBJILYFAVTF-UHFFFAOYNA-N	O=C1C2=C(O)OC(OC3OC(CO)C(O)C(O)C3O)C(C=C)C2C=C4C=5NC=6C=CC=CC6C5CCN14	rgb(128, 128, 128)	127.0392:20 143.2475:21 152.2245:16 176.0603:17 183.088:71 186.0784:21 205.0676:24 207.0843:19 208.09241:17 209.4019:16 217.0708:20 217.1232:16 219.14:18 219.1508:55 233.5229:22 235.0873:469 236.089:99 236.1066:17 237.0981:17 245.10651:36 245.1221:37 246.1057:26 247.08859:35 248.09621:16 261.05319:17 261.0705:157 262.0694:17 262.116:16 262.76541:17 262.87811:16 263.02411:17 263.08179:5368 263.125…
00124_Carboline metabolite (C26H30N2O10); PlaSMA ID-2781	Annotation level-2.2; PlaSMA ID-2781; ID title-OP_Root_Pos-1831; Max plant tissue-OP_Root_Pos	124	Carboline metabolite (C26H30N2O10); PlaSMA ID-2781	3.77	531.198	[M+H]+	C26H30N2O10		VRNUZAWFZDQEGN-UHFFFAOYNA-N	O=C1C2=COC(OC3OC(CO)C(O)C(O)C3O)C(C=C)C2CC4C(=O)NC=5C=CC=CC5C(=O)CCN14	rgb(128, 128, 128)	124.0318:84 124.0418:148 125.0397:22 130.07111:22 148.06799:48 148.07719:177 149.06551:16 162.0602:18 165.05209:16 176.0643:17 176.07291:82 194.077:16 194.097:27 195.08859:20 222.08459:17 247.8495:18 271.11191:44 271.13089:16 272.1261:37 281.07571:27 287.11111:19 297.07431:16 299.1091:42 299.1199:68 309.12201:16 341.1456:33 351.13171:23 351.15729:41 369.11981:68 369.1413:551 369.1633:157 370.1275…
00125_Strictosamide; PlaSMA ID-2675	Annotation level-2.2; PlaSMA ID-2675; ID title-OP_Root_Pos-1646; Max plant tissue-OP_Root_Pos	125	Strictosamide; PlaSMA ID-2675	5.56	499.207	[M+H]+	C26H30N2O8		LBRPLJCNRZUXLS-UHFFFAOYNA-N	O=C1C2=COC(OC3OC(CO)C(O)C(O)C3O)C(C=C)C2CC4C=5NC=6C=CC=CC6C5CCN14	rgb(128, 128, 128)	58.06619:16 58.9133:21 65.51805:20 86.50787:37 92.0509:16 96.0433:16 105.9246:26 121.0636:37 122.0712:16 130.061:16 138.0948:20 143.9556:17 144.07581:289 144.0847:322 145.0822:19 145.08929:43 146.0938:46 146.10201:16 147.0531:16 149.05009:16 149.0621:83 150.06731:20 154.06531:32 162.11501:25 168.07719:27 169.0769:16 170.0833:20 170.0948:202 170.1067:80 170.39011:33 171.0705:24 171.09171:5396 171.…
00126_Carboline metabolite (C26H26N2O8); PlaSMA ID-2658	Annotation level-2.2; PlaSMA ID-2658; ID title-OP_Root_Pos-1620; Max plant tissue-OP_Root_Pos	126	Carboline metabolite (C26H26N2O8); PlaSMA ID-2658	5.46	495.177	[M+H]+	C26H26N2O8		QBVLOMJKKLVAPJ-UHFFFAOYNA-N	O=C1C2=C(C=C3C=4NC=5C=CC=CC5C4CCN13)C(C=C)C6OC2OC7C(O6)OC(CO)C(O)C7O	rgb(128, 128, 128)	158.0824:20 169.07961:24 207.09669:18 244.0963:18 247.0887:20 261.06961:39 263.0773:158 264.0639:17 264.08051:16 264.09149:18 265.10059:50 266.1087:18 285.08569:16 285.11319:16 287.11661:18 304.11829:34 315.11261:34 316.11441:17 317.11938:19 362.26431:21 494.18079:41 495.15729:35
00127_Strictosidinic acid; PlaSMA ID-2736	Annotation level-2.2; PlaSMA ID-2736; ID title-OP_Root_Pos-1746; Max plant tissue-OP_Root_Pos	127	Strictosidinic acid; PlaSMA ID-2736	3.94	517.22	[M+H]+	C26H32N2O9		CMMIVMFGFIBAGC-UHFFFAOYNA-N	O=C(O)C1=COC(OC2OC(CO)C(O)C(O)C2O)C(C=C)C1CC3NCCC=4C=5C=CC=CC5NC43	rgb(128, 128, 128)	69.03895:18 105.0761:17 109.0288:16 112.9652:16 127.0475:19 131.048:30 131.0809:16 134.06599:20 137.59:18 144.0721:91 144.08141:43 144.0903:65 145.0407:17 145.0555:17 145.0899:20 150.972:18 151.0359:39 152.07339:16 156.07581:58 157.0769:18 158.0871:16 158.0947:22 158.10561:18 168.08299:23 169.0455:17 169.09531:18 170.103:55 172.07401:18 172.1026:28 175.0466:17 176.07159:28 177.0502:16 177.0592:18…
00128_Strictosidine; PlaSMA ID-2782	Annotation level-2.2; PlaSMA ID-2782; ID title-OP_Root_Pos-1833; Max plant tissue-OP_Root_Pos	128	Strictosidine; PlaSMA ID-2782	4.36	531.236	[M+H]+	C27H34N2O9		XBAMJZTXGWPTRM-UHFFFAOYNA-N	O=C(OC)C1=COC(OC2OC(CO)C(O)C(O)C2O)C(C=C)C1CC3NCCC=4C=5C=CC=CC5NC43	rgb(128, 128, 128)	85.03226:41 92.04338:24 119.0583:20 127.0406:16 129.07069:18 130.0636:33 130.0723:18 133.0302:20 144.08051:117 151.0334:16 151.0408:50 153.0538:16 156.0609:16 156.0914:17 165.0486:18 165.0574:109 168.0677:17 170.09509:17 170.1057:16 171.1026:20 173.1001:17 174.0509:27 183.5452:17 184.0643:20 194.1028:20 195.1073:19 200.3586:16 204.08299:16 208.0956:16 210.1286:17 220.0643:17 230.1041:20 231.097:1…
00129_Paratunamide D (not validated); PlaSMA ID-2841	Annotation level-2.2; PlaSMA ID-2841; ID title-OP_Root_Pos-1942; Max plant tissue-OP_Root_Pos	129	Paratunamide D (not validated); PlaSMA ID-2841	4.99	549.211	[M+H]+	C26H32N2O11		QPIBCHJEPFSMPX-UHFFFAOYNA-N	O=C1C2=COC(OC3OC(CO)C(O)C(O)C3O)C(C=C)C2CC(O)N1CCC4(O)C(=O)NC=5C=CC=CC54	rgb(128, 128, 128)	100.1533:16 103.8192:58 105.4728:19 106.0557:36 108.083:20 123.0862:21 124.0357:102 124.0506:16 124.4523:25 130.0584:19 130.0656:64 130.0712:27 142.0495:30 145.1981:16 145.2948:23 148.0569:28 148.0719:175 148.07941:294 149.0764:38 149.3101:16 152.02769:16 152.11369:21 153.01331:17 154.04021:19 161.08279:17 170.0372:81 170.04781:532 171.03571:16 171.04359:17 171.0517:17 172.0575:18 176.0753:65 177…
00130_Camptothecin-OH; PlaSMA ID-1817	Annotation level-2.2; PlaSMA ID-1817; ID title-OP_Root_Pos-945; Max plant tissue-OP_Root_Pos	130	Camptothecin-OH; PlaSMA ID-1817	5.77	333.124	[M+H]+	C20H16N2O3		PEZXVOHRDBYBFR-UHFFFAOYNA-N	O=C1OCC=2C(=O)N3C(=CC2C1CC)C=4N=C5C=CC=CC5=CC4C3	rgb(128, 128, 128)	144.07899:18 244.10651:17 262.11279:20 271.07419:22 276.1347:20 277.2428:17 287.12051:31 332.2468:16 333.10999:18
00131_Camptothecin; PlaSMA ID-1917	Annotation level-2.2; PlaSMA ID-1917; ID title-OP_Root_Pos-1013; Max plant tissue-OP_Root_Pos	131	Camptothecin; PlaSMA ID-1917	5.4	349.119	[M+H]+	C20H16N2O4		VSJKWCGYPAHWDS-UHFFFAOYNA-N	O=C1OCC=2C(=O)N3C(=CC2C1(O)CC)C=4N=C5C=CC=CC5=CC4C3	rgb(128, 128, 128)	107.0485:20 143.0804:16 149.03:17 155.0634:18 166.0522:16 166.06779:21 167.0649:38 167.0845:22 168.0752:22 177.1302:24 178.06709:20 180.0663:23 180.08771:32 181.0753:137 181.0862:32 182.0813:21 184.09219:18 189.2605:16 191.0667:16 192.06911:17 193.078:18 194.49879:16 195.0986:17 198.44141:28 198.472:18 202.0685:18 203.05521:27 204.0699:81 204.0798:22 205.0602:17 205.0829:59 206.0901:32 209.0677:7…
00132_Acetylated camptothecin; PlaSMA ID-2219	Annotation level-2.2; PlaSMA ID-2219; ID title-OP_Root_Pos-1249; Max plant tissue-OP_Root_Pos	132	Acetylated camptothecin; PlaSMA ID-2219	5.4	409.139	[M+H]+	C22H20N2O6		ZXQLECPLGKEUQV-UHFFFAOYNA-N	O=C(O)C(O)(C=1C=C2C=3N=C4C=CC=CC4=CC3CN2C(=O)C1COC(=O)C)CC	rgb(128, 128, 128)	183.84731:17 183.9747:22 217.0842:19 218.0892:16 219.0854:18 219.16029:19 219.5508:23 220.09061:18 220.1039:43 221.10069:96 221.1124:19 224.28799:46 230.0988:22 232.093:17 232.1209:21 233.11349:27 238.7426:16 244.10001:112 245.0959:21 247.03999:30 247.08659:18 247.0932:41 247.12379:32 247.1461:17 248.0946:34 249.0993:17 252.11301:18 256.10129:16 257.1008:17 257.13071:20 258.0896:20 259.1113:33 25…
00133_Carboline base + 4H, carboxylic acid; PlaSMA ID-805	Annotation level-2.2; PlaSMA ID-805; ID title-OS_Root_Pos-610; Max plant tissue-NT_LeafStem_Pos	133	Carboline base + 4H, carboxylic acid; PlaSMA ID-805	3.35	217.101	[M+H]+	C12H12N2O2		FSNCEEGOMTYXKY-UHFFFAOYNA-N	O=C(O)C1NCC=2NC=3C=CC=CC3C2C1	rgb(128, 128, 128)	74.02632:18 86.09882:18 121.0611:42 125.9943:22 132.0699:17 133.9294:16 135.12801:19 144.0795:108 152.1436:25 165.4969:21 206.9847:20 216.1638:17 217.0985:39
00134_Rhoeadine; PlaSMA ID-2121	Annotation level-1; PlaSMA ID-2121; ID title-Rhoeadine; Max plant tissue-AT_Root_Pos	134	Rhoeadine; PlaSMA ID-2121	4.65	384.144	[M+H]+	C21H21NO6		XRBIHOLQAKITPP-UHFFFAOYNA-N	O1C2=CC=C3C(=C2OC1)C(OC)OC4C5=CC=6OCOC6C=C5CCN(C)C34	rgb(128, 128, 128)	91.05283:37 105.0682:20 105.0753:20 105.2726:37 115.4901:17 130.06129:79 131.05:76 132.0464:55 132.0567:45 132.0799:64 133.36681:33 135.0276:18 135.0473:19 135.0544:20 136.04781:20 140.04871:31 145.0706:18 147.0405:56 148.0204:20 148.0455:98 148.0555:39 149.02071:49 149.0367:33 149.06171:313 150.0694:23 151.6468:26 158.05949:17 159.04289:44 159.054:25 159.0696:61 160.07401:32 160.71201:29 161.026…

## Sheet: Edges
Source (title)	Target (title)	Source (Comment)	Target (Comment)	Source (ID)	Target (ID)	Score	Color	Edge information
00000_Ellipticine; PlaSMA ID-1034	00036_Neocuproine; PlaSMA ID-731	Annotation level-1; PlaSMA ID-1034; ID title-Ellipticine; Max plant tissue-Standard only	Annotation level-1; PlaSMA ID-731; ID title-Neocuproine; Max plant tissue-Standard only	0	36	0.914	red	MSMS similarity
00000_Ellipticine; PlaSMA ID-1034	00064_Harmane; PlaSMA ID-516	Annotation level-1; PlaSMA ID-1034; ID title-Ellipticine; Max plant tissue-Standard only	Annotation level-1; PlaSMA ID-516; ID title-Harmane; Max plant tissue-Standard only	0	64	0.81	red	MSMS similarity
00000_Ellipticine; PlaSMA ID-1034	00065_Ethylbeta-carboline; PlaSMA ID-628	Annotation level-1; PlaSMA ID-1034; ID title-Ellipticine; Max plant tissue-Standard only	Annotation level-1; PlaSMA ID-628; ID title-Ethylbeta-carboline; Max plant tissue-Standard only	0	65	0.969	red	MSMS similarity
00001_9-Nitro-20(S)-camptothecin; PlaSMA ID-2160	00049_Coralyne; PlaSMA ID-2030	Annotation level-1; PlaSMA ID-2160; ID title-9-Nitro-20(S)-camptothecin; Max plant tissue-Standard only	Annotation level-1; PlaSMA ID-2030; ID title-Coralyne; Max plant tissue-Standard only	1	49	0.838	red	MSMS similarity
00002_Norharman; PlaSMA ID-382	00004_Sempervirine; PlaSMA ID-1248	Annotation level-1; PlaSMA ID-382; ID title-Norharman; Max plant tissue-Standard only	Annotation level-1; PlaSMA ID-1248; ID title-Sempervirine; Max plant tissue-Standard only	2	4	0.813	red	MSMS similarity
00002_Norharman; PlaSMA ID-382	00036_Neocuproine; PlaSMA ID-731	Annotation level-1; PlaSMA ID-382; ID title-Norharman; Max plant tissue-Standard only	Annotation level-1; PlaSMA ID-731; ID title-Neocuproine; Max plant tissue-Standard only	2	36	0.865	red	MSMS similarity
00002_Norharman; PlaSMA ID-382	00037_Ormosanine; PlaSMA ID-1695	Annotation level-1; PlaSMA ID-382; ID title-Norharman; Max plant tissue-Standard only	Annotation level-1; PlaSMA ID-1695; ID title-Ormosanine; Max plant tissue-Standard only	2	37	0.838	red	MSMS similarity
00002_Norharman; PlaSMA ID-382	00064_Harmane; PlaSMA ID-516	Annotation level-1; PlaSMA ID-382; ID title-Norharman; Max plant tissue-Standard only	Annotation level-1; PlaSMA ID-516; ID title-Harmane; Max plant tissue-Standard only	2	64	0.943	red	MSMS similarity
00002_Norharman; PlaSMA ID-382	00086_Cinchonidine; PlaSMA ID-1512	Annotation level-1; PlaSMA ID-382; ID title-Norharman; Max plant tissue-Standard only	Annotation level-1; PlaSMA ID-1512; ID title-Cinchonidine; Max plant tissue-Standard only	2	86	0.806	red	MSMS similarity
00004_Sempervirine; PlaSMA ID-1248	00016_Strychnine; PlaSMA ID-1829	Annotation level-1; PlaSMA ID-1248; ID title-Sempervirine; Max plant tissue-Standard only	Annotation level-1; PlaSMA ID-1829; ID title-Strychnine; Max plant tissue-Standard only	4	16	0.807	red	MSMS similarity
00004_Sempervirine; PlaSMA ID-1248	00018_Sparteine; PlaSMA ID-946	Annotation level-1; PlaSMA ID-1248; ID title-Sempervirine; Max plant tissue-Standard only	Annotation level-1; PlaSMA ID-946; ID title-Sparteine; Max plant tissue-Standard only	4	18	0.832	red	MSMS similarity
00004_Sempervirine; PlaSMA ID-1248	00020_Desoxypeganine; PlaSMA ID-404	Annotation level-1; PlaSMA ID-1248; ID title-Sempervirine; Max plant tissue-Standard only	Annotation level-1; PlaSMA ID-404; ID title-Desoxypeganine; Max plant tissue-Standard only	4	20	0.876	red	MSMS similarity
00004_Sempervirine; PlaSMA ID-1248	00036_Neocuproine; PlaSMA ID-731	Annotation level-1; PlaSMA ID-1248; ID title-Sempervirine; Max plant tissue-Standard only	Annotation level-1; PlaSMA ID-731; ID title-Neocuproine; Max plant tissue-Standard only	4	36	0.859	red	MSMS similarity
00004_Sempervirine; PlaSMA ID-1248	00037_Ormosanine; PlaSMA ID-1695	Annotation level-1; PlaSMA ID-1248; ID title-Sempervirine; Max plant tissue-Standard only	Annotation level-1; PlaSMA ID-1695; ID title-Ormosanine; Max plant tissue-Standard only	4	37	0.808	red	MSMS similarity
00004_Sempervirine; PlaSMA ID-1248	00041_Matrine; PlaSMA ID-1050	Annotation level-1; PlaSMA ID-1248; ID title-Sempervirine; Max plant tissue-Standard only	Annotation level-1; PlaSMA ID-1050; ID title-Matrine; Max plant tissue-Standard only	4	41	0.827	red	MSMS similarity
00004_Sempervirine; PlaSMA ID-1248	00064_Harmane; PlaSMA ID-516	Annotation level-1; PlaSMA ID-1248; ID title-Sempervirine; Max plant tissue-Standard only	Annotation level-1; PlaSMA ID-516; ID title-Harmane; Max plant tissue-Standard only	4	64	0.838	red	MSMS similarity
00004_Sempervirine; PlaSMA ID-1248	00065_Ethylbeta-carboline; PlaSMA ID-628	Annotation level-1; PlaSMA ID-1248; ID title-Sempervirine; Max plant tissue-Standard only	Annotation level-1; PlaSMA ID-628; ID title-Ethylbeta-carboline; Max plant tissue-Standard only	4	65	0.962	red	MSMS similarity
00004_Sempervirine; PlaSMA ID-1248	00066_Harmol; PlaSMA ID-645	Annotation level-1; PlaSMA ID-1248; ID title-Sempervirine; Max plant tissue-Standard only	Annotation level-1; PlaSMA ID-645; ID title-Harmol; Max plant tissue-Standard only	4	66	0.858	red	MSMS similarity
00004_Sempervirine; PlaSMA ID-1248	00093_Hetisine; PlaSMA ID-1787	Annotation level-1; PlaSMA ID-1248; ID title-Sempervirine; Max plant tissue-Standard only	Annotation level-1; PlaSMA ID-1787; ID title-Hetisine; Max plant tissue-Standard only	4	93	0.878	red	MSMS similarity
00004_Sempervirine; PlaSMA ID-1248	00109_Seneciphyllin; PlaSMA ID-1820	Annotation level-1; PlaSMA ID-1248; ID title-Sempervirine; Max plant tissue-Standard only	Annotation level-1; PlaSMA ID-1820; ID title-Seneciphyllin; Max plant tissue-Standard only	4	109	0.806	red	MSMS similarity
00006_Tetrahydroalstonine; PlaSMA ID-1946	00007_Corynanthine; PlaSMA ID-1985	Annotation level-1; PlaSMA ID-1946; ID title-Tetrahydroalstonine; Max plant tissue-Standard only	Annotation level-1; PlaSMA ID-1985; ID title-Corynanthine; Max plant tissue-Standard only	6	7	0.926	red	MSMS similarity
00006_Tetrahydroalstonine; PlaSMA ID-1946	00020_Desoxypeganine; PlaSMA ID-404	Annotation level-1; PlaSMA ID-1946; ID title-Tetrahydroalstonine; Max plant tissue-Standard only	Annotation level-1; PlaSMA ID-404; ID title-Desoxypeganine; Max plant tissue-Standard only	6	20	0.811	red	MSMS similarity
00006_Tetrahydroalstonine; PlaSMA ID-1946	00051_Mitraphylline; PlaSMA ID-2063	Annotation level-1; PlaSMA ID-1946; ID title-Tetrahydroalstonine; Max plant tissue-Standard only	Annotation level-1; PlaSMA ID-2063; ID title-Mitraphylline; Max plant tissue-Standard only	6	51	0.812	red	MSMS similarity
00006_Tetrahydroalstonine; PlaSMA ID-1946	00053_Formosanine; PlaSMA ID-2065	Annotation level-1; PlaSMA ID-1946; ID title-Tetrahydroalstonine; Max plant tissue-Standard only	Annotation level-1; PlaSMA ID-2065; ID title-Formosanine; Max plant tissue-Standard only	6	53	0.836	red	MSMS similarity
00006_Tetrahydroalstonine; PlaSMA ID-1946	00055_Speciofiline; PlaSMA ID-2067	Annotation level-1; PlaSMA ID-1946; ID title-Tetrahydroalstonine; Max plant tissue-Standard only	Annotation level-1; PlaSMA ID-2067; ID title-Speciofiline; Max plant tissue-Standard only	6	55	0.809	red	MSMS similarity
00006_Tetrahydroalstonine; PlaSMA ID-1946	00078_Yohimbic Acid; PlaSMA ID-1880	Annotation level-1; PlaSMA ID-1946; ID title-Tetrahydroalstonine; Max plant tissue-Standard only	Annotation level-1; PlaSMA ID-1880; ID title-Yohimbic Acid; Max plant tissue-Standard only	6	78	0.933	red	MSMS similarity
00006_Tetrahydroalstonine; PlaSMA ID-1946	00079_Hirsuteine; PlaSMA ID-2049	Annotation level-1; PlaSMA ID-1946; ID title-Tetrahydroalstonine; Max plant tissue-Standard only	Annotation level-1; PlaSMA ID-2049; ID title-Hirsuteine; Max plant tissue-Standard only	6	79	0.87	red	MSMS similarity
00006_Tetrahydroalstonine; PlaSMA ID-1946	00080_Hirsutine; PlaSMA ID-2071	Annotation level-1; PlaSMA ID-1946; ID title-Tetrahydroalstonine; Max plant tissue-Standard only	Annotation level-1; PlaSMA ID-2071; ID title-Hirsutine; Max plant tissue-Standard only	6	80	0.866	red	MSMS similarity
00007_Corynanthine; PlaSMA ID-1985	00078_Yohimbic Acid; PlaSMA ID-1880	Annotation level-1; PlaSMA ID-1985; ID title-Corynanthine; Max plant tissue-Standard only	Annotation level-1; PlaSMA ID-1880; ID title-Yohimbic Acid; Max plant tissue-Standard only	7	78	0.95	red	MSMS similarity
00007_Corynanthine; PlaSMA ID-1985	00079_Hirsuteine; PlaSMA ID-2049	Annotation level-1; PlaSMA ID-1985; ID title-Corynanthine; Max plant tissue-Standard only	Annotation level-1; PlaSMA ID-2049; ID title-Hirsuteine; Max plant tissue-Standard only	7	79	0.818	red	MSMS similarity
00008_Isoreserpin; PlaSMA ID-3023	00009_Syrosingopine; PlaSMA ID-3154	Annotation level-1; PlaSMA ID-3023; ID title-Isoreserpin; Max plant tissue-Standard only	Annotation level-1; PlaSMA ID-3154; ID title-Syrosingopine; Max plant tissue-Standard only	8	9	0.921	red	MSMS similarity
00011_Homatropine; PlaSMA ID-1288	00034_Convolvamine; PlaSMA ID-1596	Annotation level-1; PlaSMA ID-1288; ID title-Homatropine; Max plant tissue-Standard only	Annotation level-1; PlaSMA ID-1596; ID title-Convolvamine; Max plant tissue-Standard only	11	34	0.891	red	MSMS similarity
00012_Hyoscyamine; PlaSMA ID-1441	00013_Atropine; PlaSMA ID-1442	Annotation level-1; PlaSMA ID-1441; ID title-Hyoscyamine; Max plant tissue-Standard only	Annotation level-1; PlaSMA ID-1442; ID title-Atropine; Max plant tissue-Standard only	12	13	0.988	red	MSMS similarity
00012_Hyoscyamine; PlaSMA ID-1441	00034_Convolvamine; PlaSMA ID-1596	Annotation level-1; PlaSMA ID-1441; ID title-Hyoscyamine; Max plant tissue-Standard only	Annotation level-1; PlaSMA ID-1596; ID title-Convolvamine; Max plant tissue-Standard only	12	34	0.956	red	MSMS similarity
00013_Atropine; PlaSMA ID-1442	00034_Convolvamine; PlaSMA ID-1596	Annotation level-1; PlaSMA ID-1442; ID title-Atropine; Max plant tissue-Standard only	Annotation level-1; PlaSMA ID-1596; ID title-Convolvamine; Max plant tissue-Standard only	13	34	0.959	red	MSMS similarity
00014_Vincanidine; PlaSMA ID-1624	00016_Strychnine; PlaSMA ID-1829	Annotation level-1; PlaSMA ID-1624; ID title-Vincanidine; Max plant tissue-Standard only	Annotation level-1; PlaSMA ID-1829; ID title-Strychnine; Max plant tissue-Standard only	14	16	0.81	red	MSMS similarity
00015_Tubotaiwine; PlaSMA ID-1751	00017_19S-Methoxytubotaiwine; PlaSMA ID-1982	Annotation level-1; PlaSMA ID-1751; ID title-Tubotaiwine; Max plant tissue-Standard only	Annotation level-1; PlaSMA ID-1982; ID title-19S-Methoxytubotaiwine; Max plant tissue-Standard only	15	17	0.88	red	MSMS similarity
00016_Strychnine; PlaSMA ID-1829	00020_Desoxypeganine; PlaSMA ID-404	Annotation level-1; PlaSMA ID-1829; ID title-Strychnine; Max plant tissue-Standard only	Annotation level-1; PlaSMA ID-404; ID title-Desoxypeganine; Max plant tissue-Standard only	16	20	0.861	red	MSMS similarity
00016_Strychnine; PlaSMA ID-1829	00041_Matrine; PlaSMA ID-1050	Annotation level-1; PlaSMA ID-1829; ID title-Strychnine; Max plant tissue-Standard only	Annotation level-1; PlaSMA ID-1050; ID title-Matrine; Max plant tissue-Standard only	16	41	0.841	red	MSMS similarity
00016_Strychnine; PlaSMA ID-1829	00042_Koumidine; PlaSMA ID-1509	Annotation level-1; PlaSMA ID-1829; ID title-Strychnine; Max plant tissue-Standard only	Annotation level-1; PlaSMA ID-1509; ID title-Koumidine; Max plant tissue-Standard only	16	42	0.803	red	MSMS similarity
00016_Strychnine; PlaSMA ID-1829	00066_Harmol; PlaSMA ID-645	Annotation level-1; PlaSMA ID-1829; ID title-Strychnine; Max plant tissue-Standard only	Annotation level-1; PlaSMA ID-645; ID title-Harmol; Max plant tissue-Standard only	16	66	0.879	red	MSMS similarity
00016_Strychnine; PlaSMA ID-1829	00085_Cinchonine; PlaSMA ID-1510	Annotation level-1; PlaSMA ID-1829; ID title-Strychnine; Max plant tissue-Standard only	Annotation level-1; PlaSMA ID-1510; ID title-Cinchonine; Max plant tissue-Standard only	16	85	0.802	red	MSMS similarity
00016_Strychnine; PlaSMA ID-1829	00087_Quinidine; PlaSMA ID-1753	Annotation level-1; PlaSMA ID-1829; ID title-Strychnine; Max plant tissue-Standard only	Annotation level-1; PlaSMA ID-1753; ID title-Quinidine; Max plant tissue-Standard only	16	87	0.806	red	MSMS similarity
00016_Strychnine; PlaSMA ID-1829	00093_Hetisine; PlaSMA ID-1787	Annotation level-1; PlaSMA ID-1829; ID title-Strychnine; Max plant tissue-Standard only	Annotation level-1; PlaSMA ID-1787; ID title-Hetisine; Max plant tissue-Standard only	16	93	0.863	red	MSMS similarity
00016_Strychnine; PlaSMA ID-1829	00099_11,12-Methylenedioxykopsinaline; PlaSMA ID-2186	Annotation level-1; PlaSMA ID-1829; ID title-Strychnine; Max plant tissue-Standard only	Annotation level-1; PlaSMA ID-2186; ID title-11,12-Methylenedioxykopsinaline; Max plant tissue-Standard only	16	99	0.802	red	MSMS similarity
00016_Strychnine; PlaSMA ID-1829	00110_Ajmaline; PlaSMA ID-1764	Annotation level-1; PlaSMA ID-1829; ID title-Strychnine; Max plant tissue-Standard only	Annotation level-1; PlaSMA ID-1764; ID title-Ajmaline; Max plant tissue-Standard only	16	110	0.824	red	MSMS similarity
00016_Strychnine; PlaSMA ID-1829	00114_Anthranoyllycoctonine; PlaSMA ID-2956	Annotation level-1; PlaSMA ID-1829; ID title-Strychnine; Max plant tissue-Standard only	Annotation level-1; PlaSMA ID-2956; ID title-Anthranoyllycoctonine; Max plant tissue-Standard only	16	114	0.827	red	MSMS similarity
00016_Strychnine; PlaSMA ID-1829	00119_Petiline; PlaSMA ID-2253	Annotation level-1; PlaSMA ID-1829; ID title-Strychnine; Max plant tissue-Standard only	Annotation level-1; PlaSMA ID-2253; ID title-Petiline; Max plant tissue-Standard only	16	119	0.843	red	MSMS similarity
00018_Sparteine; PlaSMA ID-946	00020_Desoxypeganine; PlaSMA ID-404	Annotation level-1; PlaSMA ID-946; ID title-Sparteine; Max plant tissue-Standard only	Annotation level-1; PlaSMA ID-404; ID title-Desoxypeganine; Max plant tissue-Standard only	18	20	0.885	red	MSMS similarity
00018_Sparteine; PlaSMA ID-946	00036_Neocuproine; PlaSMA ID-731	Annotation level-1; PlaSMA ID-946; ID title-Sparteine; Max plant tissue-Standard only	Annotation level-1; PlaSMA ID-731; ID title-Neocuproine; Max plant tissue-Standard only	18	36	0.808	red	MSMS similarity
00018_Sparteine; PlaSMA ID-946	00037_Ormosanine; PlaSMA ID-1695	Annotation level-1; PlaSMA ID-946; ID title-Sparteine; Max plant tissue-Standard only	Annotation level-1; PlaSMA ID-1695; ID title-Ormosanine; Max plant tissue-Standard only	18	37	0.861	red	MSMS similarity
00018_Sparteine; PlaSMA ID-946	00041_Matrine; PlaSMA ID-1050	Annotation level-1; PlaSMA ID-946; ID title-Sparteine; Max plant tissue-Standard only	Annotation level-1; PlaSMA ID-1050; ID title-Matrine; Max plant tissue-Standard only	18	41	0.905	red	MSMS similarity
00018_Sparteine; PlaSMA ID-946	00119_Petiline; PlaSMA ID-2253	Annotation level-1; PlaSMA ID-946; ID title-Sparteine; Max plant tissue-Standard only	Annotation level-1; PlaSMA ID-2253; ID title-Petiline; Max plant tissue-Standard only	18	119	0.878	red	MSMS similarity
00019_Ethylrhoeagenine; PlaSMA ID-2180	00134_Rhoeadine; PlaSMA ID-2121	Annotation level-1; PlaSMA ID-2180; ID title-Ethylrhoeagenine; Max plant tissue-Standard only	Annotation level-1; PlaSMA ID-2121; ID title-Rhoeadine; Max plant tissue-AT_Root_Pos	19	134	0.979	red	MSMS similarity
00020_Desoxypeganine; PlaSMA ID-404	00022_Vasicine; PlaSMA ID-545	Annotation level-1; PlaSMA ID-404; ID title-Desoxypeganine; Max plant tissue-Standard only	Annotation level-1; PlaSMA ID-545; ID title-Vasicine; Max plant tissue-Standard only	20	22	0.87	red	MSMS similarity
00020_Desoxypeganine; PlaSMA ID-404	00036_Neocuproine; PlaSMA ID-731	Annotation level-1; PlaSMA ID-404; ID title-Desoxypeganine; Max plant tissue-Standard only	Annotation level-1; PlaSMA ID-731; ID title-Neocuproine; Max plant tissue-Standard only	20	36	0.849	red	MSMS similarity
00020_Desoxypeganine; PlaSMA ID-404	00037_Ormosanine; PlaSMA ID-1695	Annotation level-1; PlaSMA ID-404; ID title-Desoxypeganine; Max plant tissue-Standard only	Annotation level-1; PlaSMA ID-1695; ID title-Ormosanine; Max plant tissue-Standard only	20	37	0.86	red	MSMS similarity
00020_Desoxypeganine; PlaSMA ID-404	00041_Matrine; PlaSMA ID-1050	Annotation level-1; PlaSMA ID-404; ID title-Desoxypeganine; Max plant tissue-Standard only	Annotation level-1; PlaSMA ID-1050; ID title-Matrine; Max plant tissue-Standard only	20	41	0.881	red	MSMS similarity
00020_Desoxypeganine; PlaSMA ID-404	00066_Harmol; PlaSMA ID-645	Annotation level-1; PlaSMA ID-404; ID title-Desoxypeganine; Max plant tissue-Standard only	Annotation level-1; PlaSMA ID-645; ID title-Harmol; Max plant tissue-Standard only	20	66	0.913	red	MSMS similarity
00020_Desoxypeganine; PlaSMA ID-404	00074_(-)-Eburnamonine; PlaSMA ID-1511	Annotation level-1; PlaSMA ID-404; ID title-Desoxypeganine; Max plant tissue-Standard only	Annotation level-1; PlaSMA ID-1511; ID title-(-)-Eburnamonine; Max plant tissue-Standard only	20	74	0.821	red	MSMS similarity
00020_Desoxypeganine; PlaSMA ID-404	00075_14,15-Dehydro-16-epi-vincamine; PlaSMA ID-1944	Annotation level-1; PlaSMA ID-404; ID title-Desoxypeganine; Max plant tissue-Standard only	Annotation level-1; PlaSMA ID-1944; ID title-14,15-Dehydro-16-epi-vincamine; Max plant tissue-Standard only	20	75	0.828	red	MSMS similarity
00020_Desoxypeganine; PlaSMA ID-404	00093_Hetisine; PlaSMA ID-1787	Annotation level-1; PlaSMA ID-404; ID title-Desoxypeganine; Max plant tissue-Standard only	Annotation level-1; PlaSMA ID-1787; ID title-Hetisine; Max plant tissue-Standard only	20	93	0.928	red	MSMS similarity
00020_Desoxypeganine; PlaSMA ID-404	00094_Guan-fu base Y; PlaSMA ID-2138	Annotation level-1; PlaSMA ID-404; ID title-Desoxypeganine; Max plant tissue-Standard only	Annotation level-1; PlaSMA ID-2138; ID title-Guan-fu base Y; Max plant tissue-Standard only	20	94	0.844	red	MSMS similarity
00020_Desoxypeganine; PlaSMA ID-404	00097_Kopsinine; PlaSMA ID-1860	Annotation level-1; PlaSMA ID-404; ID title-Desoxypeganine; Max plant tissue-Standard only	Annotation level-1; PlaSMA ID-1860; ID title-Kopsinine; Max plant tissue-Standard only	20	97	0.81	red	MSMS similarity
00020_Desoxypeganine; PlaSMA ID-404	00110_Ajmaline; PlaSMA ID-1764	Annotation level-1; PlaSMA ID-404; ID title-Desoxypeganine; Max plant tissue-Standard only	Annotation level-1; PlaSMA ID-1764; ID title-Ajmaline; Max plant tissue-Standard only	20	110	0.861	red	MSMS similarity
00020_Desoxypeganine; PlaSMA ID-404	00113_Lycoctonine; PlaSMA ID-2544	Annotation level-1; PlaSMA ID-404; ID title-Desoxypeganine; Max plant tissue-Standard only	Annotation level-1; PlaSMA ID-2544; ID title-Lycoctonine; Max plant tissue-Standard only	20	113	0.842	red	MSMS similarity
00020_Desoxypeganine; PlaSMA ID-404	00114_Anthranoyllycoctonine; PlaSMA ID-2956	Annotation level-1; PlaSMA ID-404; ID title-Desoxypeganine; Max plant tissue-Standard only	Annotation level-1; PlaSMA ID-2956; ID title-Anthranoyllycoctonine; Max plant tissue-Standard only	20	114	0.857	red	MSMS similarity
00022_Vasicine; PlaSMA ID-545	00038_Napelline; PlaSMA ID-2016	Annotation level-1; PlaSMA ID-545; ID title-Vasicine; Max plant tissue-Standard only	Annotation level-1; PlaSMA ID-2016; ID title-Napelline; Max plant tissue-Standard only	22	38	0.874	red	MSMS similarity
00022_Vasicine; PlaSMA ID-545	00066_Harmol; PlaSMA ID-645	Annotation level-1; PlaSMA ID-545; ID title-Vasicine; Max plant tissue-Standard only	Annotation level-1; PlaSMA ID-645; ID title-Harmol; Max plant tissue-Standard only	22	66	0.85	red	MSMS similarity
00022_Vasicine; PlaSMA ID-545	00088_Germbudine; PlaSMA ID-3197	Annotation level-1; PlaSMA ID-545; ID title-Vasicine; Max plant tissue-Standard only	Annotation level-1; PlaSMA ID-3197; ID title-Germbudine; Max plant tissue-Standard only	22	88	0.828	red	MSMS similarity
00022_Vasicine; PlaSMA ID-545	00093_Hetisine; PlaSMA ID-1787	Annotation level-1; PlaSMA ID-545; ID title-Vasicine; Max plant tissue-Standard only	Annotation level-1; PlaSMA ID-1787; ID title-Hetisine; Max plant tissue-Standard only	22	93	0.872	red	MSMS similarity
00022_Vasicine; PlaSMA ID-545	00111_Karakoline; PlaSMA ID-2096	Annotation level-1; PlaSMA ID-545; ID title-Vasicine; Max plant tissue-Standard only	Annotation level-1; PlaSMA ID-2096; ID title-Karakoline; Max plant tissue-Standard only	22	111	0.858	red	MSMS similarity
00022_Vasicine; PlaSMA ID-545	00112_Isotalatizidine; PlaSMA ID-2216	Annotation level-1; PlaSMA ID-545; ID title-Vasicine; Max plant tissue-Standard only	Annotation level-1; PlaSMA ID-2216; ID title-Isotalatizidine; Max plant tissue-Standard only	22	112	0.854	red	MSMS similarity
00024_Chelerythrine; PlaSMA ID-1910	00029_Palmatine; PlaSMA ID-1936	Annotation level-1; PlaSMA ID-1910; ID title-Chelerythrine; Max plant tissue-Standard only	Annotation level-1; PlaSMA ID-1936; ID title-Palmatine; Max plant tissue-Standard only	24	29	0.822	red	MSMS similarity
00024_Chelerythrine; PlaSMA ID-1910	00030_Dehydrocorydaline; PlaSMA ID-2039	Annotation level-1; PlaSMA ID-1910; ID title-Chelerythrine; Max plant tissue-Standard only	Annotation level-1; PlaSMA ID-2039; ID title-Dehydrocorydaline; Max plant tissue-Standard only	24	30	0.879	red	MSMS similarity
00027_Trachelanthine; PlaSMA ID-1561	00108_Rinderine; PlaSMA ID-1551	Annotation level-1; PlaSMA ID-1561; ID title-Trachelanthine; Max plant tissue-Standard only	Annotation level-1; PlaSMA ID-1551; ID title-Rinderine; Max plant tissue-Standard only	27	108	0.845	red	MSMS similarity
00028_Protopine; PlaSMA ID-1962	00063_(+)-Chelidonine; PlaSMA ID-1961	Annotation level-1; PlaSMA ID-1962; ID title-Protopine; Max plant tissue-Standard only	Annotation level-1; PlaSMA ID-1961; ID title-(+)-Chelidonine; Max plant tissue-Standard only	28	63	0.817	red	MSMS similarity
00029_Palmatine; PlaSMA ID-1936	00030_Dehydrocorydaline; PlaSMA ID-2039	Annotation level-1; PlaSMA ID-1936; ID title-Palmatine; Max plant tissue-Standard only	Annotation level-1; PlaSMA ID-2039; ID title-Dehydrocorydaline; Max plant tissue-Standard only	29	30	0.922	red	MSMS similarity
00029_Palmatine; PlaSMA ID-1936	00049_Coralyne; PlaSMA ID-2030	Annotation level-1; PlaSMA ID-1936; ID title-Palmatine; Max plant tissue-Standard only	Annotation level-1; PlaSMA ID-2030; ID title-Coralyne; Max plant tissue-Standard only	29	49	0.892	red	MSMS similarity
00030_Dehydrocorydaline; PlaSMA ID-2039	00049_Coralyne; PlaSMA ID-2030	Annotation level-1; PlaSMA ID-2039; ID title-Dehydrocorydaline; Max plant tissue-Standard only	Annotation level-1; PlaSMA ID-2030; ID title-Coralyne; Max plant tissue-Standard only	30	49	0.891	red	MSMS similarity
00036_Neocuproine; PlaSMA ID-731	00037_Ormosanine; PlaSMA ID-1695	Annotation level-1; PlaSMA ID-731; ID title-Neocuproine; Max plant tissue-Standard only	Annotation level-1; PlaSMA ID-1695; ID title-Ormosanine; Max plant tissue-Standard only	36	37	0.843	red	MSMS similarity
00036_Neocuproine; PlaSMA ID-731	00041_Matrine; PlaSMA ID-1050	Annotation level-1; PlaSMA ID-731; ID title-Neocuproine; Max plant tissue-Standard only	Annotation level-1; PlaSMA ID-1050; ID title-Matrine; Max plant tissue-Standard only	36	41	0.811	red	MSMS similarity
00036_Neocuproine; PlaSMA ID-731	00064_Harmane; PlaSMA ID-516	Annotation level-1; PlaSMA ID-731; ID title-Neocuproine; Max plant tissue-Standard only	Annotation level-1; PlaSMA ID-516; ID title-Harmane; Max plant tissue-Standard only	36	64	0.806	red	MSMS similarity
00036_Neocuproine; PlaSMA ID-731	00065_Ethylbeta-carboline; PlaSMA ID-628	Annotation level-1; PlaSMA ID-731; ID title-Neocuproine; Max plant tissue-Standard only	Annotation level-1; PlaSMA ID-628; ID title-Ethylbeta-carboline; Max plant tissue-Standard only	36	65	0.859	red	MSMS similarity
00036_Neocuproine; PlaSMA ID-731	00093_Hetisine; PlaSMA ID-1787	Annotation level-1; PlaSMA ID-731; ID title-Neocuproine; Max plant tissue-Standard only	Annotation level-1; PlaSMA ID-1787; ID title-Hetisine; Max plant tissue-Standard only	36	93	0.844	red	MSMS similarity
00037_Ormosanine; PlaSMA ID-1695	00041_Matrine; PlaSMA ID-1050	Annotation level-1; PlaSMA ID-1695; ID title-Ormosanine; Max plant tissue-Standard only	Annotation level-1; PlaSMA ID-1050; ID title-Matrine; Max plant tissue-Standard only	37	41	0.852	red	MSMS similarity
00037_Ormosanine; PlaSMA ID-1695	00064_Harmane; PlaSMA ID-516	Annotation level-1; PlaSMA ID-1695; ID title-Ormosanine; Max plant tissue-Standard only	Annotation level-1; PlaSMA ID-516; ID title-Harmane; Max plant tissue-Standard only	37	64	0.801	red	MSMS similarity
00037_Ormosanine; PlaSMA ID-1695	00093_Hetisine; PlaSMA ID-1787	Annotation level-1; PlaSMA ID-1695; ID title-Ormosanine; Max plant tissue-Standard only	Annotation level-1; PlaSMA ID-1787; ID title-Hetisine; Max plant tissue-Standard only	37	93	0.869	red	MSMS similarity
00037_Ormosanine; PlaSMA ID-1695	00119_Petiline; PlaSMA ID-2253	Annotation level-1; PlaSMA ID-1695; ID title-Ormosanine; Max plant tissue-Standard only	Annotation level-1; PlaSMA ID-2253; ID title-Petiline; Max plant tissue-Standard only	37	119	0.867	red	MSMS similarity
00038_Napelline; PlaSMA ID-2016	00085_Cinchonine; PlaSMA ID-1510	Annotation level-1; PlaSMA ID-2016; ID title-Napelline; Max plant tissue-Standard only	Annotation level-1; PlaSMA ID-1510; ID title-Cinchonine; Max plant tissue-Standard only	38	85	0.867	red	MSMS similarity
00038_Napelline; PlaSMA ID-2016	00086_Cinchonidine; PlaSMA ID-1512	Annotation level-1; PlaSMA ID-2016; ID title-Napelline; Max plant tissue-Standard only	Annotation level-1; PlaSMA ID-1512; ID title-Cinchonidine; Max plant tissue-Standard only	38	86	0.877	red	MSMS similarity
00039_Sinomenine; PlaSMA ID-1786	00093_Hetisine; PlaSMA ID-1787	Annotation level-1; PlaSMA ID-1786; ID title-Sinomenine; Max plant tissue-Standard only	Annotation level-1; PlaSMA ID-1787; ID title-Hetisine; Max plant tissue-Standard only	39	93	0.853	red	MSMS similarity
00041_Matrine; PlaSMA ID-1050	00061_7alpha-Voacangine hydroxyindolenine; PlaSMA ID-2131	Annotation level-1; PlaSMA ID-1050; ID title-Matrine; Max plant tissue-Standard only	Annotation level-1; PlaSMA ID-2131; ID title-7alpha-Voacangine hydroxyindolenine; Max plant tissue-Standard only	41	61	0.812	red	MSMS similarity
00041_Matrine; PlaSMA ID-1050	00095_Pseudocopsinine; PlaSMA ID-1861	Annotation level-1; PlaSMA ID-1050; ID title-Matrine; Max plant tissue-Standard only	Annotation level-1; PlaSMA ID-1861; ID title-Pseudocopsinine; Max plant tissue-Standard only	41	95	0.818	red	MSMS similarity
00042_Koumidine; PlaSMA ID-1509	00093_Hetisine; PlaSMA ID-1787	Annotation level-1; PlaSMA ID-1509; ID title-Koumidine; Max plant tissue-Standard only	Annotation level-1; PlaSMA ID-1787; ID title-Hetisine; Max plant tissue-Standard only	42	93	0.837	red	MSMS similarity
00042_Koumidine; PlaSMA ID-1509	00108_Rinderine; PlaSMA ID-1551	Annotation level-1; PlaSMA ID-1509; ID title-Koumidine; Max plant tissue-Standard only	Annotation level-1; PlaSMA ID-1551; ID title-Rinderine; Max plant tissue-Standard only	42	108	0.833	red	MSMS similarity
00042_Koumidine; PlaSMA ID-1509	00111_Karakoline; PlaSMA ID-2096	Annotation level-1; PlaSMA ID-1509; ID title-Koumidine; Max plant tissue-Standard only	Annotation level-1; PlaSMA ID-2096; ID title-Karakoline; Max plant tissue-Standard only	42	111	0.855	red	MSMS similarity
00042_Koumidine; PlaSMA ID-1509	00112_Isotalatizidine; PlaSMA ID-2216	Annotation level-1; PlaSMA ID-1509; ID title-Koumidine; Max plant tissue-Standard only	Annotation level-1; PlaSMA ID-2216; ID title-Isotalatizidine; Max plant tissue-Standard only	42	112	0.816	red	MSMS similarity
00046_Senecionine; PlaSMA ID-1833	00047_Retrorsine; PlaSMA ID-1937	Annotation level-1; PlaSMA ID-1833; ID title-Senecionine; Max plant tissue-Standard only	Annotation level-1; PlaSMA ID-1937; ID title-Retrorsine; Max plant tissue-Standard only	46	47	0.892	red	MSMS similarity
00046_Senecionine; PlaSMA ID-1833	00066_Harmol; PlaSMA ID-645	Annotation level-1; PlaSMA ID-1833; ID title-Senecionine; Max plant tissue-Standard only	Annotation level-1; PlaSMA ID-645; ID title-Harmol; Max plant tissue-Standard only	46	66	0.826	red	MSMS similarity
00046_Senecionine; PlaSMA ID-1833	00114_Anthranoyllycoctonine; PlaSMA ID-2956	Annotation level-1; PlaSMA ID-1833; ID title-Senecionine; Max plant tissue-Standard only	Annotation level-1; PlaSMA ID-2956; ID title-Anthranoyllycoctonine; Max plant tissue-Standard only	46	114	0.807	red	MSMS similarity
00047_Retrorsine; PlaSMA ID-1937	00066_Harmol; PlaSMA ID-645	Annotation level-1; PlaSMA ID-1937; ID title-Retrorsine; Max plant tissue-Standard only	Annotation level-1; PlaSMA ID-645; ID title-Harmol; Max plant tissue-Standard only	47	66	0.808	red	MSMS similarity
00047_Retrorsine; PlaSMA ID-1937	00114_Anthranoyllycoctonine; PlaSMA ID-2956	Annotation level-1; PlaSMA ID-1937; ID title-Retrorsine; Max plant tissue-Standard only	Annotation level-1; PlaSMA ID-2956; ID title-Anthranoyllycoctonine; Max plant tissue-Standard only	47	114	0.802	red	MSMS similarity
00050_Isoformosanine; PlaSMA ID-2062	00051_Mitraphylline; PlaSMA ID-2063	Annotation level-1; PlaSMA ID-2062; ID title-Isoformosanine; Max plant tissue-Standard only	Annotation level-1; PlaSMA ID-2063; ID title-Mitraphylline; Max plant tissue-Standard only	50	51	0.844	red	MSMS similarity
00050_Isoformosanine; PlaSMA ID-2062	00052_Pteropodine; PlaSMA ID-2064	Annotation level-1; PlaSMA ID-2062; ID title-Isoformosanine; Max plant tissue-Standard only	Annotation level-1; PlaSMA ID-2064; ID title-Pteropodine; Max plant tissue-Standard only	50	52	0.883	red	MSMS similarity
00050_Isoformosanine; PlaSMA ID-2062	00053_Formosanine; PlaSMA ID-2065	Annotation level-1; PlaSMA ID-2062; ID title-Isoformosanine; Max plant tissue-Standard only	Annotation level-1; PlaSMA ID-2065; ID title-Formosanine; Max plant tissue-Standard only	50	53	0.911	red	MSMS similarity
00050_Isoformosanine; PlaSMA ID-2062	00055_Speciofiline; PlaSMA ID-2067	Annotation level-1; PlaSMA ID-2062; ID title-Isoformosanine; Max plant tissue-Standard only	Annotation level-1; PlaSMA ID-2067; ID title-Speciofiline; Max plant tissue-Standard only	50	55	0.924	red	MSMS similarity
00050_Isoformosanine; PlaSMA ID-2062	00057_Isorhynchophylline; PlaSMA ID-2130	Annotation level-1; PlaSMA ID-2062; ID title-Isoformosanine; Max plant tissue-Standard only	Annotation level-1; PlaSMA ID-2130; ID title-Isorhynchophylline; Max plant tissue-Standard only	50	57	0.884	red	MSMS similarity
00050_Isoformosanine; PlaSMA ID-2062	00058_Isomajdine; PlaSMA ID-2326	Annotation level-1; PlaSMA ID-2062; ID title-Isoformosanine; Max plant tissue-Standard only	Annotation level-1; PlaSMA ID-2326; ID title-Isomajdine; Max plant tissue-Standard only	50	58	0.856	red	MSMS similarity
00051_Mitraphylline; PlaSMA ID-2063	00052_Pteropodine; PlaSMA ID-2064	Annotation level-1; PlaSMA ID-2063; ID title-Mitraphylline; Max plant tissue-Standard only	Annotation level-1; PlaSMA ID-2064; ID title-Pteropodine; Max plant tissue-Standard only	51	52	0.89	red	MSMS similarity
00051_Mitraphylline; PlaSMA ID-2063	00053_Formosanine; PlaSMA ID-2065	Annotation level-1; PlaSMA ID-2063; ID title-Mitraphylline; Max plant tissue-Standard only	Annotation level-1; PlaSMA ID-2065; ID title-Formosanine; Max plant tissue-Standard only	51	53	0.972	red	MSMS similarity
00051_Mitraphylline; PlaSMA ID-2063	00055_Speciofiline; PlaSMA ID-2067	Annotation level-1; PlaSMA ID-2063; ID title-Mitraphylline; Max plant tissue-Standard only	Annotation level-1; PlaSMA ID-2067; ID title-Speciofiline; Max plant tissue-Standard only	51	55	0.862	red	MSMS similarity
00052_Pteropodine; PlaSMA ID-2064	00053_Formosanine; PlaSMA ID-2065	Annotation level-1; PlaSMA ID-2064; ID title-Pteropodine; Max plant tissue-Standard only	Annotation level-1; PlaSMA ID-2065; ID title-Formosanine; Max plant tissue-Standard only	52	53	0.896	red	MSMS similarity
00052_Pteropodine; PlaSMA ID-2064	00054_Speciophylline; PlaSMA ID-2066	Annotation level-1; PlaSMA ID-2064; ID title-Pteropodine; Max plant tissue-Standard only	Annotation level-1; PlaSMA ID-2066; ID title-Speciophylline; Max plant tissue-Standard only	52	54	0.862	red	MSMS similarity
00052_Pteropodine; PlaSMA ID-2064	00055_Speciofiline; PlaSMA ID-2067	Annotation level-1; PlaSMA ID-2064; ID title-Pteropodine; Max plant tissue-Standard only	Annotation level-1; PlaSMA ID-2067; ID title-Speciofiline; Max plant tissue-Standard only	52	55	0.903	red	MSMS similarity
00052_Pteropodine; PlaSMA ID-2064	00056_Rhynchophylline; PlaSMA ID-2129	Annotation level-1; PlaSMA ID-2064; ID title-Pteropodine; Max plant tissue-Standard only	Annotation level-1; PlaSMA ID-2129; ID title-Rhynchophylline; Max plant tissue-Standard only	52	56	0.804	red	MSMS similarity
00052_Pteropodine; PlaSMA ID-2064	00058_Isomajdine; PlaSMA ID-2326	Annotation level-1; PlaSMA ID-2064; ID title-Pteropodine; Max plant tissue-Standard only	Annotation level-1; PlaSMA ID-2326; ID title-Isomajdine; Max plant tissue-Standard only	52	58	0.936	red	MSMS similarity
00053_Formosanine; PlaSMA ID-2065	00055_Speciofiline; PlaSMA ID-2067	Annotation level-1; PlaSMA ID-2065; ID title-Formosanine; Max plant tissue-Standard only	Annotation level-1; PlaSMA ID-2067; ID title-Speciofiline; Max plant tissue-Standard only	53	55	0.878	red	MSMS similarity
00053_Formosanine; PlaSMA ID-2065	00057_Isorhynchophylline; PlaSMA ID-2130	Annotation level-1; PlaSMA ID-2065; ID title-Formosanine; Max plant tissue-Standard only	Annotation level-1; PlaSMA ID-2130; ID title-Isorhynchophylline; Max plant tissue-Standard only	53	57	0.808	red	MSMS similarity
00053_Formosanine; PlaSMA ID-2065	00058_Isomajdine; PlaSMA ID-2326	Annotation level-1; PlaSMA ID-2065; ID title-Formosanine; Max plant tissue-Standard only	Annotation level-1; PlaSMA ID-2326; ID title-Isomajdine; Max plant tissue-Standard only	53	58	0.839	red	MSMS similarity
00054_Speciophylline; PlaSMA ID-2066	00055_Speciofiline; PlaSMA ID-2067	Annotation level-1; PlaSMA ID-2066; ID title-Speciophylline; Max plant tissue-Standard only	Annotation level-1; PlaSMA ID-2067; ID title-Speciofiline; Max plant tissue-Standard only	54	55	0.896	red	MSMS similarity
00054_Speciophylline; PlaSMA ID-2066	00058_Isomajdine; PlaSMA ID-2326	Annotation level-1; PlaSMA ID-2066; ID title-Speciophylline; Max plant tissue-Standard only	Annotation level-1; PlaSMA ID-2326; ID title-Isomajdine; Max plant tissue-Standard only	54	58	0.866	red	MSMS similarity
00055_Speciofiline; PlaSMA ID-2067	00056_Rhynchophylline; PlaSMA ID-2129	Annotation level-1; PlaSMA ID-2067; ID title-Speciofiline; Max plant tissue-Standard only	Annotation level-1; PlaSMA ID-2129; ID title-Rhynchophylline; Max plant tissue-Standard only	55	56	0.868	red	MSMS similarity
00055_Speciofiline; PlaSMA ID-2067	00057_Isorhynchophylline; PlaSMA ID-2130	Annotation level-1; PlaSMA ID-2067; ID title-Speciofiline; Max plant tissue-Standard only	Annotation level-1; PlaSMA ID-2130; ID title-Isorhynchophylline; Max plant tissue-Standard only	55	57	0.828	red	MSMS similarity
00055_Speciofiline; PlaSMA ID-2067	00058_Isomajdine; PlaSMA ID-2326	Annotation level-1; PlaSMA ID-2067; ID title-Speciofiline; Max plant tissue-Standard only	Annotation level-1; PlaSMA ID-2326; ID title-Isomajdine; Max plant tissue-Standard only	55	58	0.889	red	MSMS similarity
00055_Speciofiline; PlaSMA ID-2067	00067_Harmalol; PlaSMA ID-658	Annotation level-1; PlaSMA ID-2067; ID title-Speciofiline; Max plant tissue-Standard only	Annotation level-1; PlaSMA ID-658; ID title-Harmalol; Max plant tissue-Standard only	55	67	0.807	red	MSMS similarity
00056_Rhynchophylline; PlaSMA ID-2129	00080_Hirsutine; PlaSMA ID-2071	Annotation level-1; PlaSMA ID-2129; ID title-Rhynchophylline; Max plant tissue-Standard only	Annotation level-1; PlaSMA ID-2071; ID title-Hirsutine; Max plant tissue-Standard only	56	80	0.846	red	MSMS similarity
00060_Voacristine; PlaSMA ID-2128	00061_7alpha-Voacangine hydroxyindolenine; PlaSMA ID-2131	Annotation level-1; PlaSMA ID-2128; ID title-Voacristine; Max plant tissue-Standard only	Annotation level-1; PlaSMA ID-2131; ID title-7alpha-Voacangine hydroxyindolenine; Max plant tissue-Standard only	60	61	0.813	red	MSMS similarity
00060_Voacristine; PlaSMA ID-2128	00111_Karakoline; PlaSMA ID-2096	Annotation level-1; PlaSMA ID-2128; ID title-Voacristine; Max plant tissue-Standard only	Annotation level-1; PlaSMA ID-2096; ID title-Karakoline; Max plant tissue-Standard only	60	111	0.837	red	MSMS similarity
00060_Voacristine; PlaSMA ID-2128	00112_Isotalatizidine; PlaSMA ID-2216	Annotation level-1; PlaSMA ID-2128; ID title-Voacristine; Max plant tissue-Standard only	Annotation level-1; PlaSMA ID-2216; ID title-Isotalatizidine; Max plant tissue-Standard only	60	112	0.846	red	MSMS similarity
00061_7alpha-Voacangine hydroxyindolenine; PlaSMA ID-2131	00088_Germbudine; PlaSMA ID-3197	Annotation level-1; PlaSMA ID-2131; ID title-7alpha-Voacangine hydroxyindolenine; Max plant tissue-Standard only	Annotation level-1; PlaSMA ID-3197; ID title-Germbudine; Max plant tissue-Standard only	61	88	0.801	red	MSMS similarity
00061_7alpha-Voacangine hydroxyindolenine; PlaSMA ID-2131	00099_11,12-Methylenedioxykopsinaline; PlaSMA ID-2186	Annotation level-1; PlaSMA ID-2131; ID title-7alpha-Voacangine hydroxyindolenine; Max plant tissue-Standard only	Annotation level-1; PlaSMA ID-2186; ID title-11,12-Methylenedioxykopsinaline; Max plant tissue-Standard only	61	99	0.845	red	MSMS similarity
00061_7alpha-Voacangine hydroxyindolenine; PlaSMA ID-2131	00111_Karakoline; PlaSMA ID-2096	Annotation level-1; PlaSMA ID-2131; ID title-7alpha-Voacangine hydroxyindolenine; Max plant tissue-Standard only	Annotation level-1; PlaSMA ID-2096; ID title-Karakoline; Max plant tissue-Standard only	61	111	0.825	red	MSMS similarity
00061_7alpha-Voacangine hydroxyindolenine; PlaSMA ID-2131	00112_Isotalatizidine; PlaSMA ID-2216	Annotation level-1; PlaSMA ID-2131; ID title-7alpha-Voacangine hydroxyindolenine; Max plant tissue-Standard only	Annotation level-1; PlaSMA ID-2216; ID title-Isotalatizidine; Max plant tissue-Standard only	61	112	0.816	red	MSMS similarity
00061_7alpha-Voacangine hydroxyindolenine; PlaSMA ID-2131	00119_Petiline; PlaSMA ID-2253	Annotation level-1; PlaSMA ID-2131; ID title-7alpha-Voacangine hydroxyindolenine; Max plant tissue-Standard only	Annotation level-1; PlaSMA ID-2253; ID title-Petiline; Max plant tissue-Standard only	61	119	0.824	red	MSMS similarity
00062_(+)-Chelidonine; PlaSMA ID-1960	00063_(+)-Chelidonine; PlaSMA ID-1961	Annotation level-1; PlaSMA ID-1960; ID title-(+)-Chelidonine; Max plant tissue-Standard only	Annotation level-1; PlaSMA ID-1961; ID title-(+)-Chelidonine; Max plant tissue-Standard only	62	63	0.945	red	MSMS similarity
00064_Harmane; PlaSMA ID-516	00065_Ethylbeta-carboline; PlaSMA ID-628	Annotation level-1; PlaSMA ID-516; ID title-Harmane; Max plant tissue-Standard only	Annotation level-1; PlaSMA ID-628; ID title-Ethylbeta-carboline; Max plant tissue-Standard only	64	65	0.847	red	MSMS similarity
00064_Harmane; PlaSMA ID-516	00066_Harmol; PlaSMA ID-645	Annotation level-1; PlaSMA ID-516; ID title-Harmane; Max plant tissue-Standard only	Annotation level-1; PlaSMA ID-645; ID title-Harmol; Max plant tissue-Standard only	64	66	0.901	red	MSMS similarity
00064_Harmane; PlaSMA ID-516	00067_Harmalol; PlaSMA ID-658	Annotation level-1; PlaSMA ID-516; ID title-Harmane; Max plant tissue-Standard only	Annotation level-1; PlaSMA ID-658; ID title-Harmalol; Max plant tissue-Standard only	64	67	0.815	red	MSMS similarity
00065_Ethylbeta-carboline; PlaSMA ID-628	00066_Harmol; PlaSMA ID-645	Annotation level-1; PlaSMA ID-628; ID title-Ethylbeta-carboline; Max plant tissue-Standard only	Annotation level-1; PlaSMA ID-645; ID title-Harmol; Max plant tissue-Standard only	65	66	0.904	red	MSMS similarity
00065_Ethylbeta-carboline; PlaSMA ID-628	00068_Harmine; PlaSMA ID-781	Annotation level-1; PlaSMA ID-628; ID title-Ethylbeta-carboline; Max plant tissue-Standard only	Annotation level-1; PlaSMA ID-781; ID title-Harmine; Max plant tissue-Standard only	65	68	0.958	red	MSMS similarity
00065_Ethylbeta-carboline; PlaSMA ID-628	00110_Ajmaline; PlaSMA ID-1764	Annotation level-1; PlaSMA ID-628; ID title-Ethylbeta-carboline; Max plant tissue-Standard only	Annotation level-1; PlaSMA ID-1764; ID title-Ajmaline; Max plant tissue-Standard only	65	110	0.824	red	MSMS similarity
00066_Harmol; PlaSMA ID-645	00093_Hetisine; PlaSMA ID-1787	Annotation level-1; PlaSMA ID-645; ID title-Harmol; Max plant tissue-Standard only	Annotation level-1; PlaSMA ID-1787; ID title-Hetisine; Max plant tissue-Standard only	66	93	0.907	red	MSMS similarity
00066_Harmol; PlaSMA ID-645	00109_Seneciphyllin; PlaSMA ID-1820	Annotation level-1; PlaSMA ID-645; ID title-Harmol; Max plant tissue-Standard only	Annotation level-1; PlaSMA ID-1820; ID title-Seneciphyllin; Max plant tissue-Standard only	66	109	0.833	red	MSMS similarity
00066_Harmol; PlaSMA ID-645	00114_Anthranoyllycoctonine; PlaSMA ID-2956	Annotation level-1; PlaSMA ID-645; ID title-Harmol; Max plant tissue-Standard only	Annotation level-1; PlaSMA ID-2956; ID title-Anthranoyllycoctonine; Max plant tissue-Standard only	66	114	0.802	red	MSMS similarity
00069_Gelsemine; PlaSMA ID-1732	00085_Cinchonine; PlaSMA ID-1510	Annotation level-1; PlaSMA ID-1732; ID title-Gelsemine; Max plant tissue-Standard only	Annotation level-1; PlaSMA ID-1510; ID title-Cinchonine; Max plant tissue-Standard only	69	85	0.812	red	MSMS similarity
00074_(-)-Eburnamonine; PlaSMA ID-1511	00078_Yohimbic Acid; PlaSMA ID-1880	Annotation level-1; PlaSMA ID-1511; ID title-(-)-Eburnamonine; Max plant tissue-Standard only	Annotation level-1; PlaSMA ID-1880; ID title-Yohimbic Acid; Max plant tissue-Standard only	74	78	0.817	red	MSMS similarity
00074_(-)-Eburnamonine; PlaSMA ID-1511	00080_Hirsutine; PlaSMA ID-2071	Annotation level-1; PlaSMA ID-1511; ID title-(-)-Eburnamonine; Max plant tissue-Standard only	Annotation level-1; PlaSMA ID-2071; ID title-Hirsutine; Max plant tissue-Standard only	74	80	0.802	red	MSMS similarity
00074_(-)-Eburnamonine; PlaSMA ID-1511	00093_Hetisine; PlaSMA ID-1787	Annotation level-1; PlaSMA ID-1511; ID title-(-)-Eburnamonine; Max plant tissue-Standard only	Annotation level-1; PlaSMA ID-1787; ID title-Hetisine; Max plant tissue-Standard only	74	93	0.803	red	MSMS similarity
00078_Yohimbic Acid; PlaSMA ID-1880	00079_Hirsuteine; PlaSMA ID-2049	Annotation level-1; PlaSMA ID-1880; ID title-Yohimbic Acid; Max plant tissue-Standard only	Annotation level-1; PlaSMA ID-2049; ID title-Hirsuteine; Max plant tissue-Standard only	78	79	0.841	red	MSMS similarity
00078_Yohimbic Acid; PlaSMA ID-1880	00080_Hirsutine; PlaSMA ID-2071	Annotation level-1; PlaSMA ID-1880; ID title-Yohimbic Acid; Max plant tissue-Standard only	Annotation level-1; PlaSMA ID-2071; ID title-Hirsutine; Max plant tissue-Standard only	78	80	0.86	red	MSMS similarity
00079_Hirsuteine; PlaSMA ID-2049	00080_Hirsutine; PlaSMA ID-2071	Annotation level-1; PlaSMA ID-2049; ID title-Hirsuteine; Max plant tissue-Standard only	Annotation level-1; PlaSMA ID-2071; ID title-Hirsutine; Max plant tissue-Standard only	79	80	0.919	red	MSMS similarity
00080_Hirsutine; PlaSMA ID-2071	00081_Mitragynine; PlaSMA ID-2187	Annotation level-1; PlaSMA ID-2071; ID title-Hirsutine; Max plant tissue-Standard only	Annotation level-1; PlaSMA ID-2187; ID title-Mitragynine; Max plant tissue-Standard only	80	81	0.94	red	MSMS similarity
00080_Hirsutine; PlaSMA ID-2071	00083_7-Hydroxymitragynine; PlaSMA ID-2263	Annotation level-1; PlaSMA ID-2071; ID title-Hirsutine; Max plant tissue-Standard only	Annotation level-1; PlaSMA ID-2263; ID title-7-Hydroxymitragynine; Max plant tissue-Standard only	80	83	0.814	red	MSMS similarity
00081_Mitragynine; PlaSMA ID-2187	00082_Reserpic acid; PlaSMA ID-2195	Annotation level-1; PlaSMA ID-2187; ID title-Mitragynine; Max plant tissue-Standard only	Annotation level-1; PlaSMA ID-2195; ID title-Reserpic acid; Max plant tissue-Standard only	81	82	0.856	red	MSMS similarity
00081_Mitragynine; PlaSMA ID-2187	00083_7-Hydroxymitragynine; PlaSMA ID-2263	Annotation level-1; PlaSMA ID-2187; ID title-Mitragynine; Max plant tissue-Standard only	Annotation level-1; PlaSMA ID-2263; ID title-7-Hydroxymitragynine; Max plant tissue-Standard only	81	83	0.844	red	MSMS similarity
00085_Cinchonine; PlaSMA ID-1510	00086_Cinchonidine; PlaSMA ID-1512	Annotation level-1; PlaSMA ID-1510; ID title-Cinchonine; Max plant tissue-Standard only	Annotation level-1; PlaSMA ID-1512; ID title-Cinchonidine; Max plant tissue-Standard only	85	86	0.858	red	MSMS similarity
00085_Cinchonine; PlaSMA ID-1510	00093_Hetisine; PlaSMA ID-1787	Annotation level-1; PlaSMA ID-1510; ID title-Cinchonine; Max plant tissue-Standard only	Annotation level-1; PlaSMA ID-1787; ID title-Hetisine; Max plant tissue-Standard only	85	93	0.83	red	MSMS similarity
00085_Cinchonine; PlaSMA ID-1510	00111_Karakoline; PlaSMA ID-2096	Annotation level-1; PlaSMA ID-1510; ID title-Cinchonine; Max plant tissue-Standard only	Annotation level-1; PlaSMA ID-2096; ID title-Karakoline; Max plant tissue-Standard only	85	111	0.833	red	MSMS similarity
00085_Cinchonine; PlaSMA ID-1510	00112_Isotalatizidine; PlaSMA ID-2216	Annotation level-1; PlaSMA ID-1510; ID title-Cinchonine; Max plant tissue-Standard only	Annotation level-1; PlaSMA ID-2216; ID title-Isotalatizidine; Max plant tissue-Standard only	85	112	0.802	red	MSMS similarity
00085_Cinchonine; PlaSMA ID-1510	00119_Petiline; PlaSMA ID-2253	Annotation level-1; PlaSMA ID-1510; ID title-Cinchonine; Max plant tissue-Standard only	Annotation level-1; PlaSMA ID-2253; ID title-Petiline; Max plant tissue-Standard only	85	119	0.805	red	MSMS similarity
00086_Cinchonidine; PlaSMA ID-1512	00087_Quinidine; PlaSMA ID-1753	Annotation level-1; PlaSMA ID-1512; ID title-Cinchonidine; Max plant tissue-Standard only	Annotation level-1; PlaSMA ID-1753; ID title-Quinidine; Max plant tissue-Standard only	86	87	0.842	red	MSMS similarity
00086_Cinchonidine; PlaSMA ID-1512	00093_Hetisine; PlaSMA ID-1787	Annotation level-1; PlaSMA ID-1512; ID title-Cinchonidine; Max plant tissue-Standard only	Annotation level-1; PlaSMA ID-1787; ID title-Hetisine; Max plant tissue-Standard only	86	93	0.823	red	MSMS similarity
00086_Cinchonidine; PlaSMA ID-1512	00111_Karakoline; PlaSMA ID-2096	Annotation level-1; PlaSMA ID-1512; ID title-Cinchonidine; Max plant tissue-Standard only	Annotation level-1; PlaSMA ID-2096; ID title-Karakoline; Max plant tissue-Standard only	86	111	0.805	red	MSMS similarity
00087_Quinidine; PlaSMA ID-1753	00093_Hetisine; PlaSMA ID-1787	Annotation level-1; PlaSMA ID-1753; ID title-Quinidine; Max plant tissue-Standard only	Annotation level-1; PlaSMA ID-1787; ID title-Hetisine; Max plant tissue-Standard only	87	93	0.815	red	MSMS similarity
00088_Germbudine; PlaSMA ID-3197	00110_Ajmaline; PlaSMA ID-1764	Annotation level-1; PlaSMA ID-3197; ID title-Germbudine; Max plant tissue-Standard only	Annotation level-1; PlaSMA ID-1764; ID title-Ajmaline; Max plant tissue-Standard only	88	110	0.804	red	MSMS similarity
00088_Germbudine; PlaSMA ID-3197	00111_Karakoline; PlaSMA ID-2096	Annotation level-1; PlaSMA ID-3197; ID title-Germbudine; Max plant tissue-Standard only	Annotation level-1; PlaSMA ID-2096; ID title-Karakoline; Max plant tissue-Standard only	88	111	0.881	red	MSMS similarity
00088_Germbudine; PlaSMA ID-3197	00112_Isotalatizidine; PlaSMA ID-2216	Annotation level-1; PlaSMA ID-3197; ID title-Germbudine; Max plant tissue-Standard only	Annotation level-1; PlaSMA ID-2216; ID title-Isotalatizidine; Max plant tissue-Standard only	88	112	0.866	red	MSMS similarity
00093_Hetisine; PlaSMA ID-1787	00097_Kopsinine; PlaSMA ID-1860	Annotation level-1; PlaSMA ID-1787; ID title-Hetisine; Max plant tissue-Standard only	Annotation level-1; PlaSMA ID-1860; ID title-Kopsinine; Max plant tissue-Standard only	93	97	0.824	red	MSMS similarity
00093_Hetisine; PlaSMA ID-1787	00105_DL-Coniine; PlaSMA ID-80	Annotation level-1; PlaSMA ID-1787; ID title-Hetisine; Max plant tissue-Standard only	Annotation level-1; PlaSMA ID-80; ID title-DL-Coniine; Max plant tissue-Standard only	93	105	0.907	red	MSMS similarity
00093_Hetisine; PlaSMA ID-1787	00106_Pilocarpine; PlaSMA ID-738	Annotation level-1; PlaSMA ID-1787; ID title-Hetisine; Max plant tissue-Standard only	Annotation level-1; PlaSMA ID-738; ID title-Pilocarpine; Max plant tissue-Standard only	93	106	0.837	red	MSMS similarity
00093_Hetisine; PlaSMA ID-1787	00109_Seneciphyllin; PlaSMA ID-1820	Annotation level-1; PlaSMA ID-1787; ID title-Hetisine; Max plant tissue-Standard only	Annotation level-1; PlaSMA ID-1820; ID title-Seneciphyllin; Max plant tissue-Standard only	93	109	0.901	red	MSMS similarity
00093_Hetisine; PlaSMA ID-1787	00110_Ajmaline; PlaSMA ID-1764	Annotation level-1; PlaSMA ID-1787; ID title-Hetisine; Max plant tissue-Standard only	Annotation level-1; PlaSMA ID-1764; ID title-Ajmaline; Max plant tissue-Standard only	93	110	0.85	red	MSMS similarity
00093_Hetisine; PlaSMA ID-1787	00112_Isotalatizidine; PlaSMA ID-2216	Annotation level-1; PlaSMA ID-1787; ID title-Hetisine; Max plant tissue-Standard only	Annotation level-1; PlaSMA ID-2216; ID title-Isotalatizidine; Max plant tissue-Standard only	93	112	0.928	red	MSMS similarity
00093_Hetisine; PlaSMA ID-1787	00119_Petiline; PlaSMA ID-2253	Annotation level-1; PlaSMA ID-1787; ID title-Hetisine; Max plant tissue-Standard only	Annotation level-1; PlaSMA ID-2253; ID title-Petiline; Max plant tissue-Standard only	93	119	0.919	red	MSMS similarity
00094_Guan-fu base Y; PlaSMA ID-2138	00113_Lycoctonine; PlaSMA ID-2544	Annotation level-1; PlaSMA ID-2138; ID title-Guan-fu base Y; Max plant tissue-Standard only	Annotation level-1; PlaSMA ID-2544; ID title-Lycoctonine; Max plant tissue-Standard only	94	113	0.835	red	MSMS similarity
00097_Kopsinine; PlaSMA ID-1860	00106_Pilocarpine; PlaSMA ID-738	Annotation level-1; PlaSMA ID-1860; ID title-Kopsinine; Max plant tissue-Standard only	Annotation level-1; PlaSMA ID-738; ID title-Pilocarpine; Max plant tissue-Standard only	97	106	0.836	red	MSMS similarity
00097_Kopsinine; PlaSMA ID-1860	00119_Petiline; PlaSMA ID-2253	Annotation level-1; PlaSMA ID-1860; ID title-Kopsinine; Max plant tissue-Standard only	Annotation level-1; PlaSMA ID-2253; ID title-Petiline; Max plant tissue-Standard only	97	119	0.805	red	MSMS similarity
00099_11,12-Methylenedioxykopsinaline; PlaSMA ID-2186	00116_Mesaconitine; PlaSMA ID-3085	Annotation level-1; PlaSMA ID-2186; ID title-11,12-Methylenedioxykopsinaline; Max plant tissue-Standard only	Annotation level-1; PlaSMA ID-3085; ID title-Mesaconitine; Max plant tissue-Standard only	99	116	0.83	red	MSMS similarity
00099_11,12-Methylenedioxykopsinaline; PlaSMA ID-2186	00118_Acetylaconitine; PlaSMA ID-3173	Annotation level-1; PlaSMA ID-2186; ID title-11,12-Methylenedioxykopsinaline; Max plant tissue-Standard only	Annotation level-1; PlaSMA ID-3173; ID title-Acetylaconitine; Max plant tissue-Standard only	99	118	0.807	red	MSMS similarity
00099_11,12-Methylenedioxykopsinaline; PlaSMA ID-2186	00119_Petiline; PlaSMA ID-2253	Annotation level-1; PlaSMA ID-2186; ID title-11,12-Methylenedioxykopsinaline; Max plant tissue-Standard only	Annotation level-1; PlaSMA ID-2253; ID title-Petiline; Max plant tissue-Standard only	99	119	0.831	red	MSMS similarity
00105_DL-Coniine; PlaSMA ID-80	00119_Petiline; PlaSMA ID-2253	Annotation level-1; PlaSMA ID-80; ID title-DL-Coniine; Max plant tissue-Standard only	Annotation level-1; PlaSMA ID-2253; ID title-Petiline; Max plant tissue-Standard only	105	119	0.89	red	MSMS similarity
00106_Pilocarpine; PlaSMA ID-738	00112_Isotalatizidine; PlaSMA ID-2216	Annotation level-1; PlaSMA ID-738; ID title-Pilocarpine; Max plant tissue-Standard only	Annotation level-1; PlaSMA ID-2216; ID title-Isotalatizidine; Max plant tissue-Standard only	106	112	0.832	red	MSMS similarity
00106_Pilocarpine; PlaSMA ID-738	00119_Petiline; PlaSMA ID-2253	Annotation level-1; PlaSMA ID-738; ID title-Pilocarpine; Max plant tissue-Standard only	Annotation level-1; PlaSMA ID-2253; ID title-Petiline; Max plant tissue-Standard only	106	119	0.833	red	MSMS similarity
00110_Ajmaline; PlaSMA ID-1764	00112_Isotalatizidine; PlaSMA ID-2216	Annotation level-1; PlaSMA ID-1764; ID title-Ajmaline; Max plant tissue-Standard only	Annotation level-1; PlaSMA ID-2216; ID title-Isotalatizidine; Max plant tissue-Standard only	110	112	0.822	red	MSMS similarity
00110_Ajmaline; PlaSMA ID-1764	00119_Petiline; PlaSMA ID-2253	Annotation level-1; PlaSMA ID-1764; ID title-Ajmaline; Max plant tissue-Standard only	Annotation level-1; PlaSMA ID-2253; ID title-Petiline; Max plant tissue-Standard only	110	119	0.825	red	MSMS similarity
00111_Karakoline; PlaSMA ID-2096	00112_Isotalatizidine; PlaSMA ID-2216	Annotation level-1; PlaSMA ID-2096; ID title-Karakoline; Max plant tissue-Standard only	Annotation level-1; PlaSMA ID-2216; ID title-Isotalatizidine; Max plant tissue-Standard only	111	112	0.947	red	MSMS similarity
00111_Karakoline; PlaSMA ID-2096	00119_Petiline; PlaSMA ID-2253	Annotation level-1; PlaSMA ID-2096; ID title-Karakoline; Max plant tissue-Standard only	Annotation level-1; PlaSMA ID-2253; ID title-Petiline; Max plant tissue-Standard only	111	119	0.803	red	MSMS similarity
00112_Isotalatizidine; PlaSMA ID-2216	00113_Lycoctonine; PlaSMA ID-2544	Annotation level-1; PlaSMA ID-2216; ID title-Isotalatizidine; Max plant tissue-Standard only	Annotation level-1; PlaSMA ID-2544; ID title-Lycoctonine; Max plant tissue-Standard only	112	113	0.857	red	MSMS similarity
00112_Isotalatizidine; PlaSMA ID-2216	00119_Petiline; PlaSMA ID-2253	Annotation level-1; PlaSMA ID-2216; ID title-Isotalatizidine; Max plant tissue-Standard only	Annotation level-1; PlaSMA ID-2253; ID title-Petiline; Max plant tissue-Standard only	112	119	0.806	red	MSMS similarity
00113_Lycoctonine; PlaSMA ID-2544	00114_Anthranoyllycoctonine; PlaSMA ID-2956	Annotation level-1; PlaSMA ID-2544; ID title-Lycoctonine; Max plant tissue-Standard only	Annotation level-1; PlaSMA ID-2956; ID title-Anthranoyllycoctonine; Max plant tissue-Standard only	113	114	0.894	red	MSMS similarity
00113_Lycoctonine; PlaSMA ID-2544	00119_Petiline; PlaSMA ID-2253	Annotation level-1; PlaSMA ID-2544; ID title-Lycoctonine; Max plant tissue-Standard only	Annotation level-1; PlaSMA ID-2253; ID title-Petiline; Max plant tissue-Standard only	113	119	0.838	red	MSMS similarity
00114_Anthranoyllycoctonine; PlaSMA ID-2956	00119_Petiline; PlaSMA ID-2253	Annotation level-1; PlaSMA ID-2956; ID title-Anthranoyllycoctonine; Max plant tissue-Standard only	Annotation level-1; PlaSMA ID-2253; ID title-Petiline; Max plant tissue-Standard only	114	119	0.848	red	MSMS similarity
00115_Hypaconitine; PlaSMA ID-3047	00116_Mesaconitine; PlaSMA ID-3085	Annotation level-1; PlaSMA ID-3047; ID title-Hypaconitine; Max plant tissue-Standard only	Annotation level-1; PlaSMA ID-3085; ID title-Mesaconitine; Max plant tissue-Standard only	115	116	0.893	red	MSMS similarity
00115_Hypaconitine; PlaSMA ID-3047	00117_Aconitine; PlaSMA ID-3119	Annotation level-1; PlaSMA ID-3047; ID title-Hypaconitine; Max plant tissue-Standard only	Annotation level-1; PlaSMA ID-3119; ID title-Aconitine; Max plant tissue-Standard only	115	117	0.929	red	MSMS similarity
00115_Hypaconitine; PlaSMA ID-3047	00118_Acetylaconitine; PlaSMA ID-3173	Annotation level-1; PlaSMA ID-3047; ID title-Hypaconitine; Max plant tissue-Standard only	Annotation level-1; PlaSMA ID-3173; ID title-Acetylaconitine; Max plant tissue-Standard only	115	118	0.924	red	MSMS similarity
00116_Mesaconitine; PlaSMA ID-3085	00117_Aconitine; PlaSMA ID-3119	Annotation level-1; PlaSMA ID-3085; ID title-Mesaconitine; Max plant tissue-Standard only	Annotation level-1; PlaSMA ID-3119; ID title-Aconitine; Max plant tissue-Standard only	116	117	0.918	red	MSMS similarity
00116_Mesaconitine; PlaSMA ID-3085	00118_Acetylaconitine; PlaSMA ID-3173	Annotation level-1; PlaSMA ID-3085; ID title-Mesaconitine; Max plant tissue-Standard only	Annotation level-1; PlaSMA ID-3173; ID title-Acetylaconitine; Max plant tissue-Standard only	116	118	0.886	red	MSMS similarity
00117_Aconitine; PlaSMA ID-3119	00118_Acetylaconitine; PlaSMA ID-3173	Annotation level-1; PlaSMA ID-3119; ID title-Aconitine; Max plant tissue-Standard only	Annotation level-1; PlaSMA ID-3173; ID title-Acetylaconitine; Max plant tissue-Standard only	117	118	0.93	red	MSMS similarity
00121_Deoxypumiloside; PlaSMA ID-2665	00122_Pumiloside; PlaSMA ID-2720	Annotation level-2.2; PlaSMA ID-2665; ID title-OP_Root_Pos-1628; Max plant tissue-OP_Root_Pos	Annotation level-2.2; PlaSMA ID-2720; ID title-OP_Root_Pos-1716; Max plant tissue-OP_Root_Pos	121	122	0.831	red	MSMS similarity
